# Supplementary material for: PNP-type ligands enabled copper-catalyzed N-formylation of amines with CO2 in the presence of silanes
Source: Royal Society of Chemistry journal article supplement (doi:10.1039/d2ob01986h), 2022-12-22

# **PNP Type Ligands Enabled Copper-catalyzed *N*-Formylation of Amines with CO<sub>2</sub> in Presence of Silanes**

Zijie Song, Jun Liu, Shuya Xing, Xinxin Shao\*, Jiayun Li, Jiajian Peng\*, and Ying Bai\*

---

College of Material, Chemistry and Chemical Engineering, Key Laboratory of Organosilicon Chemistry and Material Technology of Ministry of Education, Key Laboratory of Organosilicon Material Technology of Zhejiang Province, Hangzhou Normal University, Hangzhou 311121, Zhejiang, People's Republic of China.

E-mail: yingbai@hznu.edu.cn, jjpeng@hznu.edu.cn, xxshao@hznu.edu.cn

## **Contents**

|                                                      |           |
|------------------------------------------------------|-----------|
| <b>I. General information .....</b>                  | <b>2</b>  |
| <b>II. Synthesis of ligands .....</b>                | <b>3</b>  |
| <b>III. Optimization of the reaction conditions.</b> | <b>11</b> |
| <b>IV. Substrate scope.....</b>                      | <b>16</b> |
| <b>V. Mechanistic studies .....</b>                  | <b>22</b> |
| <b>VI. NMR spectra .....</b>                         | <b>24</b> |

## I. General information

**General procedures.** General Information Unless specifically stated, all reagents were commercially obtained and where appropriate, purified prior to use. For example, toluene, ether (Et<sub>2</sub>O) was dried and distilled from metal sodium and benzophenone. Other commercially available reagents and solvents were used directly without purification. Reactions were monitored by GC. Flash column chromatography was performed over silica (200 – 300 mesh). <sup>1</sup>H, <sup>13</sup>C, <sup>31</sup>P NMR spectra were recorded on a Bruker 400 MHz or 500 MHz spectrometer in CDCl<sub>3</sub>, *d*<sub>6</sub>-DMSO or C<sub>6</sub>D<sub>6</sub>. Multiplicities were given as: s (singlet); d (doublet); dd (doublets of doublet); t (triplet); q (quartet); td (triplet of doublets); tt (triplet of triplets) ddd (doublet of doublet of doublets) or m (multiplets).

**Reagents.** The following chemicals were used as received: Formaldehyde (Aladdin), Diphenylphosphine (Meirui), Polyethylene glycol monomethylether, 350 (Alfa Aesar), Polyethylene glycol monomethylether, 750 (Alfa Aesar), Pyridine (J&K Scientific), Methylsulfonyl chloride (J&K Scientific), Ammonium hydroxide (Hannuo-Chemical), N-Butylamine (Alfa Aesar), 2-Aminopyridine (Yien-Chemical), 2,2'-Dipicolylamine (Aladdin), Aniline (Aladdin), Benzylamine (Aladdin), 4-Methoxyaniline (Yien-Chemical), Ethylenediamine (Meirui), 1,2-Diaminocyclohexane (J&K Scientific), N-Methylaniline (Macklin), N-Ethylaniline (Macklin), N-Ethylbenzylamine (Meirui), N-Methylcyclohexylamine (Energy-Chemical), Diethylamine (Aladdin), p-Toluidine (Aladdin), 4-Chloroaniline (Macklin), 4-Bromoaniline (Energy-Chemical), 4-Iodoaniline (Aladdin), 2,6-Dimethylaniline (Aladdin), 2,4,6-Trimethylaniline (Alfa Aesar), 2-Phenylethylamine (Aladdin), 2,6-Diethylaniline (Meirui), Octylamine (Aladdin), Dodecylamine (Alfa Aesar), Cupric acetate (Aladdin), Ferrous acetate (Energy-Chemical), Cobalt(II) acetate tetrahydrate (Aladdin), Nickel(II) acetate tetrahydrate (Macklin), Cupric acetylacetonate (Aladdin), Ferric acetylacetonate (Aladdin), Bis(acetylacetonato)cobalt (Macklin), Nickel(II) acetylacetonate (SCRC), Cupric bromide (SCRC), Cuprous bromide

(Meirui), Cuprous iodide (Macklin), Trimethoxysilane (Meirui), Phenylsilane (Energy-Chemical), Diphenylsilane (J&K Scientific), Triethoxysilane (Meirui), Triethylsilane (Macklin).

## II. Synthesis of ligands

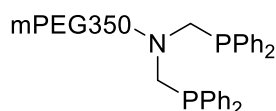

**L1**

Synthesis of polyethylene glycol monomethyl ether-methanesulfonic ester: 17.5 g (0.0500 mol) mPEG350, 40.0 mL toluene resealed, 7.91 g (0.100 mol) pyridine were successively added into 250 mL three-necked flask the mixture was heated to 88 °C under argon, and then 11.45 g (0.100 mol) methyl sulfonyl chloride was added drop by drop. The reaction was kept at 88 °C for 30 h, cooled to room temperature, and then the mixture of 8.00 mL concentrated hydrochloric acid and 16.0 mL water was added. Solid precipitate appeared, and the precipitate disappeared after agitation. Placed without moving and the solution is stratified, the lower layer is pyridine salt. The lower layer was separated, extracted twice with toluene, and merged with the upper layer. Toluene was removed by vacuum distillation and 12.12 g product was obtained, with yield of 57.0%.

Synthesis of mPEG350-NH<sub>2</sub>: polyethylene glycol monomethyl ether methyl sulfonate (7.00 mmol, 3.00 g) was added into ammonia (15.0 mmol, 0.530 g) drop by drop at 50 °C, and reacted for 5 h. The excess ammonia water was removed by vacuum at 50 °C, The product is 2.15 g, yield of 71.7%.

Synthesis of polyethylene glycol N,P ligand **mPEG350-C<sub>26</sub>H<sub>24</sub>NP<sub>2</sub> L1**: Argon gas was pumped into 30.0 mL of resealed toluene in a dried 100 mL two-necked flask for about 10 minutes. Under argon atmosphere, 2.15 g (5.00 mmol) MPEG350-NH<sub>2</sub> and 1.22 g (15.0 mmol, 50% excess) 37% formaldehyde solution were successively added into the toluene, heated up to 60 – 63 °C, and injected diphenylphosphine (10.0 mmol, 1.86g) in while stirring, and stirred for 6 h. After cooling to room temperature,

the upper layer was separated out by a separation funnel, anhydrous sodium sulfate was added and then filtrated. At last, toluene was removed by vacuum distillation. Vacuum drying at 60 °C, the compound was isolated as a light yellow oil (2.86 g, 3.835 mmol, 76.7% yield).

**L1** :  $^1\text{H}$  NMR (400 MHz,  $\text{CDCl}_3$ )  $\delta$  7.49 – 7.16 (20H, m), 3.66 (2H, t,  $J$  = 5.9 Hz), 3.56 (26H, q,  $J$  = 5.9, 5.1 Hz), 3.29 (3H, s);  $^{13}\text{C}$  NMR (101 MHz,  $\text{CDCl}_3$ )  $\delta$  138.2, 133.2, 128.7, 71.9, 70.6, 70.6, 70.3, 62.6, 59.1;  $^{31}\text{P}$  NMR (162 MHz,  $\text{CDCl}_3$ )  $\delta$  – 12.6.

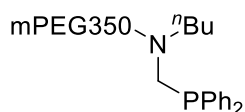

**L2**

Synthesis of mPEG350-NHC<sub>4</sub>H<sub>9</sub>: polyethylene glycol monomethyl ether methyl sulfonate (14.0 mmol, 6.00 g) was added into N-butyl amine (20.0 mmol, 1.46 g) drop by drop at 50 °C, and reacted for 5 h. Wash three times with anhydrous ether to remove excess N-butylamine. Anhydrous ether was removed by vacuum at 50 °C. The product is 4.26 g, yield of 75.0%.

Synthesis of polyethylene glycol N,P ligand **mPEG350-C<sub>17</sub>H<sub>21</sub>NP L2**: Argon gas was pumped into 30.0 mL of resteamed toluene in a dried 100 mL two-necked flask for about 10 minutes. Under argon atmosphere, 4.26g (10 mmol) MPEG350-NHC<sub>4</sub>H<sub>9</sub> and 1.22 g (15.0 mmol, 50% excess) 37% formaldehyde solution were successively added into the toluene, heated up to 60 – 63 °C, and injected diphenylphosphine (10.0 mmol, 1.86g) in while stirring, and stirred for 6 h. After cooling to room temperature, the upper layer was separated out by a separation funnel, anhydrous sodium sulfate was added and then filtrated. At last, toluene was removed by vacuum distillation. Vacuum drying at 60 °C, the compound was isolated as a light yellow oil (5.30 g, 8.5 mmol, 85.0% yield).

**L2** :  $^1\text{H}$  NMR (400 MHz,  $\text{CDCl}_3$ )  $\delta$  7.41 – 7.30 (10H, m), 3.65 (2H, t,  $J$  = 5.9 Hz), 3.58 – 3.52 (26H, m), 3.28 (3H, s), 2.75 (2H, q,  $J$  = 8.2, 7.5 Hz), 2.33 (2H, s), 1.34 – 1.18 (2H, m), 1.08 (2H, dt,  $J$  = 15.0, 7.3 Hz), 0.74 (3H, dd,  $J$  = 16.8, 7.3 Hz);  $^{13}\text{C}$

**NMR** (101 MHz, CDCl<sub>3</sub>)  $\delta$  137.2, 132.0, 127.3, 70.9, 70.3, 69.6, 69.5, 69.5, 58.0, 57.8, 57.8, 55.1, 27.6, 19.3, 13.0; **<sup>31</sup>P NMR** (162 MHz, CDCl<sub>3</sub>)  $\delta$  – 28.6.

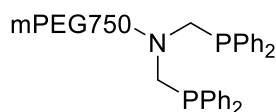

**L3**

Synthesis of polyethylene glycol N,P ligand **mPEG750-C<sub>26</sub>H<sub>24</sub>NP<sub>2</sub> L3**: Argon gas was pumped into 30 mL of resealed toluene in a dried 100 mL two-necked flask for about 10 minutes. Under argon atmosphere, 3.75 g (5.00 mmol) MPEG750-NH<sub>2</sub> and 1.22 g (15.0 mmol, 50% excess) 37% formaldehyde solution were successively added into the toluene, heated up to 60 – 63 °C, and injected diphenylphosphine (10.0 mmol, 1.86 g) in while stirring, and stirred for 6 h. After cooling to room temperature, the upper layer was separated out by a separation funnel, anhydrous sodium sulfate was added and then filtrated. At last, toluene was removed by vacuum distillation. Vacuum drying at 60 °C, the compound was isolated as a light yellow oil (4.61 g, 4.0 mmol, 80.0% yield).

**L3** : **<sup>1</sup>H NMR** (400 MHz, CDCl<sub>3</sub>)  $\delta$  7.45 – 7.27 (20H, m), 3.68 (2H, t,  $J$  = 6.0 Hz), 3.64 – 3.48 (62H, m), 3.31 (3H, s), 2.15 – 1.98 (2H, s), 1.70 (2H, s); **<sup>13</sup>C NMR** (101 MHz, CDCl<sub>3</sub>)  $\delta$  135.8, 133.0, 128.6, 128.5, 71.9, 71.3, 70.6, 70.5, 62.7, 59.0; **<sup>31</sup>P NMR** (162 MHz, CDCl<sub>3</sub>)  $\delta$  – 11.6.

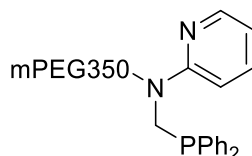

**L4**

Synthesis of mPEG350-NHC<sub>5</sub>H<sub>4</sub>: polyethylene glycol monomethyl ether methyl sulfonate (14.0 mmol, 6.00 g) was added into 2-aminopyridine (20.0 mmol, 1.88 g) drop by drop at 50 °C, and reacted for 5 h. Wash three times with anhydrous ether to remove excess 2-aminopyridine. Anhydrous ether was removed by vacuum at 50 °C. The product is 4.43 g, yield of 73.2%.

Synthesis of polyethylene glycol N,P ligand **mPEG350-C<sub>18</sub>H<sub>16</sub>N<sub>2</sub>P L4**: Argon gas

was pumped into 30.0 mL of resteamed toluene in a dried 100 mL two-necked flask for about 10 minutes. Under argon atmosphere, 4.32g (10.0 mmol) MPEG350-NHC<sub>5</sub>H<sub>4</sub> and 1.22 (15.0 mmol, 50% excess) 37% formaldehyde solution were successively added into the toluene, heated up to 60 – 63 °C, and injected diphenylphosphine (10.0 mmol, 1.86 g) in while stirring, and stirred for 6 h. After cooling to room temperature, the upper layer was separated out by a separation funnel, anhydrous sodium sulfate was added and then filtrated. At last, toluene was removed by vacuum distillation. Vacuum drying at 60 °C, the compound was isolated as a light yellow oil (5.20 g, 8.25 mmol, 82.5% yield).

**L4** : <sup>1</sup>H NMR (400 MHz, CDCl<sub>3</sub>) δ 7.82 (1H, d, *J* = 11.8 Hz), 7.77 (1H, d, *J* = 11.3 Hz), 7.51 – 7.27 (12H, m), 3.76 (2H, t, *J* = 5.9 Hz), 3.65 (26H, s), 3.38 (3H, s), 2.37 (2H, d, *J* = 10.2 Hz); <sup>13</sup>C NMR (101 MHz, CDCl<sub>3</sub>) δ 137.4, 137.1, 133.0, 132.8, 129.1, 128.7, 113.2, 107.6, 71.9, 71.4, 70.7, 70.6, 70.5, 59.1, 53.5; <sup>31</sup>P NMR (162 MHz, CDCl<sub>3</sub>) δ – 23.4.

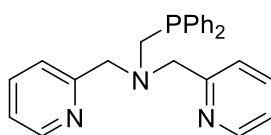

**L5**

#### **Synthesis of 1-(diphenylphosphanyl)-*N,N*-bis(pyridin-2-ylmethyl)methanamine**

**L5**: Argon gas was pumped into 30.0 mL of resteamed toluene in a dried 100 mL two-necked flask for about 10 minutes. Under argon atmosphere, 1.99 g (10.0 mmol) 2,2'-dimethylpyridine amine and 1.22 g (15.0 mmol, 50% excess) 37% formaldehyde solution were successively added into the toluene, heated up to 60 – 63 °C, and injected diphenylphosphine (10.0 mmol, 1.86 g) in while stirring, and stirred for 4 h. After cooling to room temperature, the upper layer was separated out by a separation funnel, anhydrous sodium sulfate was added and then filtrated, toluene was removed by vacuum distillation, attained the gooey substance. Vacuum drying at 60 °C, the compound was isolated as a white solid (3.23 g, 8.12 mmol, 81.2% yield).

**1-(diphenylphosphanyl)-*N,N*-bis(pyridin-2-ylmethyl)methanamine L5** : <sup>1</sup>H NMR (400 MHz, CDCl<sub>3</sub>) δ 8.41 (2H, d, *J* = 5.4 Hz), 7.43 (2H, td, *J* = 7.7, 1.8 Hz), 7.30 –

7.11 (14H, m), 3.94 (4H, s), 3.34 (2H, d,  $J = 3.9$  Hz);  $^{13}\text{C}$  NMR (101 MHz,  $\text{CDCl}_3$ )  $\delta$  159.1, 148.8, 137.7, 136.4, 133.2, 133.0, 128.6, 128.4, 128.3, 123.2, 122.0, 61.3, 57.3;  $^{31}\text{P}$  NMR (162 MHz,  $\text{CDCl}_3$ )  $\delta$  -26.4.

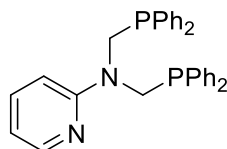

**L6**

Synthesis of *N,N*-bis((diphenylphosphanyl)methyl)pyridin-2-amine **L6**: Argon gas was pumped into 30.0 mL of resealed toluene in a dried 100 mL two-necked flask for about 10 minutes. Under argon atmosphere, 0.940 g (10.0 mmol) 2-aminopyridine and 2.43 g (30.0 mmol, 50% excess) 37% formaldehyde solution were successively added into the toluene, heated up to 60–63 °C, and injected diphenylphosphine (20.0 mmol, 3.72 g) in while stirring, and stirred for 4 h. After cooling to room temperature, the upper layer was separated out by a separation funnel, anhydrous sodium sulfate was added and then filtrated, toluene was removed by vacuum distillation, attained the gooey substance. After cooling to room temperature, dichloromethane was added to dissolve all the viscous substances and then anhydrous ethanol was added, white substances appeared. Continue to standing for 2 – 5 h, white crystal appeared, filtered and washed with anhydrous ethanol, vacuum drying at 60 °C, the compound was isolated as a white solid (4.09 g, 8.34 mmol, 83.4% yield).

*N,N*-bis((diphenylphosphanyl)methyl)pyridin-2-amine **L6**:  $^1\text{H}$  NMR (400 MHz,  $\text{CDCl}_3$ )  $\delta$  8.06 (1H, dd,  $J = 4.8, 1.1$  Hz), 7.45 – 7.37 (1H, m), 7.33 – 7.21 (20H, m), 6.50 – 6.43 (2H, m), 4.13 (4H, d,  $J = 3.3$  Hz);  $^{13}\text{C}$  NMR (101 MHz,  $\text{CDCl}_3$ )  $\delta$  147.7, 137.4, 136.9, 133.3, 128.8, 128.5, 112.2, 107.2, 50.8;  $^{31}\text{P}$  NMR (162 MHz,  $\text{CDCl}_3$ )  $\delta$  -23.5.

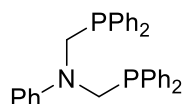

**L7**

Synthesis of *N,N*-bis((diphenylphosphanyl)methyl)aniline **L7**: Argon gas was

pumped into 30.0 mL of resealed toluene in a dried 100 mL two-necked flask for about 10 minutes. Under argon atmosphere, 0.930 g (10.0 mmol) phenylamine and 2.43 g (30.0 mmol, 50% excess) 37% formaldehyde solution were successively added into the toluene, heated up to 60 – 63 °C, and injected diphenylphosphine (20.0 mmol, 3.72 g) in while stirring, and stirred for 4 h. After cooling to room temperature, the upper layer was separated out by a separation funnel, anhydrous sodium sulfate was added and then filtrated, toluene was removed by vacuum distillation, attained the gooey substance. After cooling to room temperature, dichloromethane was added to dissolve all the viscous substances and then anhydrous ethanol was added, white substances appeared. Continue to standing for 2 – 5 h, white crystal appeared, filtered and washed with anhydrous ethanol, vacuum drying at 60 °C, the compound was isolated as a white solid (4.18 g, 8.54 mmol, 85.4% yield).

***N, N*-bis((diphenylphosphanyl)methyl)aniline L7:**  $^1\text{H}$  NMR (400 MHz,  $\text{CDCl}_3$ )  $\delta$  7.55 – 7.41 (20H, m), 7.35 (2H, dd,  $J = 8.7, 7.3$  Hz), 7.01 (2H, d,  $J = 8.0$  Hz), 6.90 (1H, t,  $J = 7.3$  Hz), 4.15 (4H, d,  $J = 4.5$  Hz);  $^{13}\text{C}$  NMR (101 MHz,  $\text{CDCl}_3$ )  $\delta$  148.2, 137.6, 133.3, 129.1, 128.7, 117.8, 114.8, 54.2;  $^{31}\text{P}$  NMR (162 MHz,  $\text{CDCl}_3$ )  $\delta$  – 27.6.

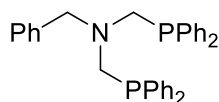

**L8**

**Synthesis of *N*-benzyl-1-((diphenylphosphanyl)-*N*-((diphenylphosphanyl)methyl)-methanamine L8:** Argon gas was pumped into 30.0 mL of resealed toluene in a dried 100 mL two-necked flask for about 10 minutes. Under argon atmosphere, 1.07 g (10.0 mmol) benzylamine and 2.43 g (30.0 mmol, 50% excess) 37% formaldehyde solution were successively added into the toluene, heated up to 60 – 63 °C, and injected diphenylphosphine (20.0 mmol, 3.72 g) in while stirring, and stirred for 4 h. After cooling to room temperature, the upper layer was separated out by a separation funnel, anhydrous sodium sulfate was added and then filtrated, toluene was removed by vacuum distillation, attained the gooey substance. After cooling to room temperature, dichloromethane was added to dissolve all the viscous substances and



then anhydrous ethanol was added, white substances appeared. Continue to standing for 2 – 5 h, white crystal appeared, filtered and washed with anhydrous ethanol, vacuum drying at 60 °C, the compound was isolated as a white solid (4.19 g, 8.32 mmol, 83.2% yield).

***N*-benzyl-1-(diphenylphosphanyl)-*N*-((diphenylphosphanyl)methyl)methanamine**

**L8:**  $^1\text{H}$  NMR (400 MHz,  $\text{CDCl}_3$ )  $\delta$  7.54 (8H, td,  $J = 7.4, 1.7$  Hz), 7.45 – 7.36 (15H, m), 7.30 (2H, dd,  $J = 6.4, 2.7$  Hz), 4.22 (2H, d,  $J = 8.6$  Hz), 3.79 (4H, d,  $J = 3.0$  Hz);  $^{13}\text{C}$  NMR (101 MHz,  $\text{CDCl}_3$ )  $\delta$  138.6, 138.1, 133.3, 129.6, 128.6, 128.3, 127.2, 60.9, 58.5;  $^{31}\text{P}$  NMR (162 MHz,  $\text{CDCl}_3$ )  $\delta$  – 28.6.

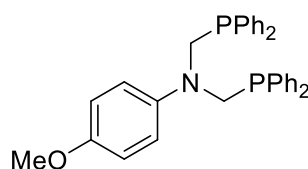

**L9**

**Synthesis of *N,N*-bis((diphenylphosphanyl)methyl)-4-methoxyaniline L9:** Argon gas was pumped into 30.0 mL of resteamed toluene in a dried 100 mL two-necked flask for about 10 minutes. Under argon atmosphere, 1.23 g (10.0 mmol) *p*-methoxyaniline and 2.43 g (30.0 mmol, 50% excess) 37% formaldehyde solution were successively added into the toluene, heated up to 60 – 63 °C, and injected diphenylphosphine (20.0 mmol, 3.72 g) in while stirring, and stirred for 4 h. After cooling to room temperature, the upper layer was separated out by a separation funnel, anhydrous sodium sulfate was added and then filtrated, toluene was removed by vacuum distillation, attained the gooey substance. After cooling to room temperature, dichloromethane was added to dissolve all the viscous substances and then anhydrous ethanol was added, white substances appeared. Continue to standing for 2 – 5 h, white crystal appeared, filtered and washed with anhydrous ethanol, vacuum drying at 60 °C, the compound was isolated as a white solid (4.53 g, 8.72 mmol, 87.2% yield).

***N,N*-bis((diphenylphosphanyl)methyl)-4-methoxyaniline L9:**  $^1\text{H}$  NMR (400 MHz,  $\text{CDCl}_3$ )  $\delta$  7.44 – 7.37 (8H, m), 7.33 (12H, dd,  $J = 9.6, 5.0$  Hz), 6.88 (2H, dd,  $J = 9.6, 2.7$  Hz), 6.84 – 6.79 (2H, m), 4.08 (4H, t,  $J = 6.9$  Hz), 3.78 (3H, d,  $J = 6.4$  Hz);  $^{13}\text{C}$  NMR (101 MHz,  $\text{CDCl}_3$ )  $\delta$  153.2, 143.4, 137.9, 137.7, 133.4, 128.8, 118.7, 114.5,

55.7;  $^{31}\text{P}$  NMR (162 MHz,  $\text{CDCl}_3$ )  $\delta$  – 27.4.

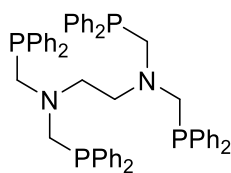

**L10**

**Synthesis of  $N^1,N^1,N^2,N^2$ -tetrakis((diphenylphosphanyl)methyl)ethane-**

**1,2-diamine L10:** Argon gas was pumped into 30.0 mL of resteamed toluene in a dried 100 mL two-necked flask for about 10 minutes. Under argon atmosphere, 0.60 g (10.0 mmol) ethylenediamine and 4.87 g (60.0 mmol, 50% excess) 37% formaldehyde solution were successively added into the toluene, heated up to 60 – 63 °C, and injected diphenylphosphine (40.0 mmol, 7.45 g) in while stirring, and stirred for 4 h. After cooling to room temperature, the upper layer was separated out by a separation funnel, anhydrous sodium sulfate was added and then filtrated, toluene was removed by vacuum distillation, attained the gooey substance. After cooling to room temperature, dichloromethane was added to dissolve all the viscous substances and then anhydrous ethanol was added, white substances appeared. Continue to standing for 2 – 5 h, white crystal appeared, filtered and washed with anhydrous ethanol, vacuum drying at 60 °C, the compound was isolated as a white solid (7.72 g, 9.05 mmol, 90.5% yield).

**$N^1,N^1,N^2,N^2$ -tetrakis((diphenylphosphanyl)methyl)ethane-1,2-diamine L10:**  $^1\text{H}$  NMR (400 MHz,  $\text{CDCl}_3$ )  $\delta$  7.31 – 7.23 (16H, m), 7.19 – 7.10 (24H, m), 3.42 (8H, d,  $J$  = 3.1 Hz), 2.80 (4H, s);  $^{13}\text{C}$  NMR (101 MHz,  $\text{CDCl}_3$ )  $\delta$  138.2, 133.3, 133.1, 128.4, 58.9, 53.2;  $^{31}\text{P}$  NMR (162 MHz,  $\text{CDCl}_3$ )  $\delta$  – 28.4.

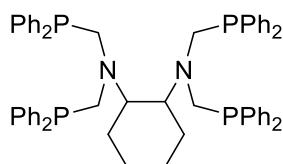

**L11**

**Synthesis of  $N^1,N^1,N^2,N^2$ -tetrakis((diphenylphosphanyl)methyl)cyclohexane-1,2-diamine L11:** Argon gas was pumped into 30.0 mL of resteamed toluene in a dried

100 mL two-necked flask for about 10 minutes. Under argon atmosphere, 1.14 g (10.0 mmol) 1,2-cyclohexanediamine and 4.87 g (60.0 mmol, 50% excess) 37% formaldehyde solution were successively added into the toluene, heated up to 60 – 63 °C, and injected diphenylphosphine (40.0 mmol, 7.45 g) in while stirring, and stirred for 4 h. After cooling to room temperature, the upper layer was separated out by a separation funnel, anhydrous sodium sulfate was added and then filtrated, toluene was removed by vacuum distillation, attained the gooey substance. After cooling to room temperature, dichloromethane was added to dissolve all the viscous substances and then anhydrous ethanol was added, white substances appeared. Continue to standing for 2 – 5 h, white crystal appeared, filtered and washed with anhydrous ethanol, vacuum drying at 60 °C, the compound was isolated as a white solid (8.27 g, 9.12 mmol, 91.2% yield).

***N*<sup>1</sup>,*N*<sup>1</sup>,*N*<sup>2</sup>,*N*<sup>2</sup>-tetrakis((diphenylphosphanyl)methyl)cyclohexane-1,2-diamine L11:**

<sup>1</sup>H NMR (400 MHz, CDCl<sub>3</sub>) δ 7.53 – 7.43 (16H, m), 7.33 (24H, s), 3.92 – 3.74 (8H, m), 3.18 (2H, d, *J* = 9.2 Hz), 1.78 (2H, d, *J* = 12.3 Hz), 1.52 (2H, d, *J* = 7.4 Hz); <sup>13</sup>C NMR (101 MHz, CDCl<sub>3</sub>) δ 138.9, 133.9, 133.2, 128.7, 128.4, 61.8, 55.3, 28.0, 25.5; <sup>31</sup>P NMR (162 MHz, CDCl<sub>3</sub>) δ – 24.8.

### III. Optimization of the reaction conditions

**Table S1. Evaluation of different metal salts**

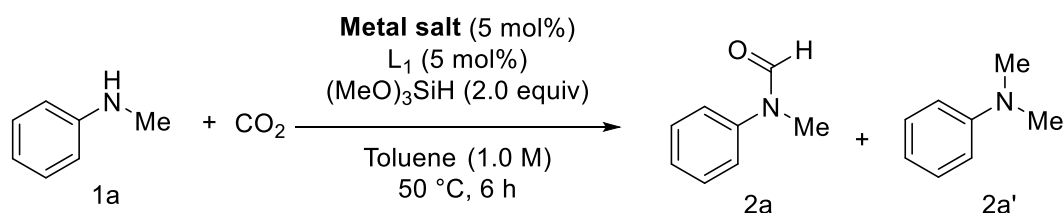

| Entry | Catalyst                  | Yield (%) | Select.(%) |     |
|-------|---------------------------|-----------|------------|-----|
|       |                           |           | 2a         | 2a' |
| 1     | Cu(OAc) <sub>2</sub> /L1  | 98.6      | 95.4       | 4.6 |
| 2     | Fe(OAc) <sub>2</sub> /L1  | -         | -          | -   |
| 3     | Co(OAc) <sub>2</sub> /L1  | -         | -          | -   |
| 4     | Ni(OAc) <sub>2</sub> /L1  | -         | -          | -   |
| 5     | Cu(acac) <sub>2</sub> /L1 | 81.8      | 97.7       | 2.3 |

|   |                           |     |      |      |
|---|---------------------------|-----|------|------|
| 6 | Fe(acac) <sub>3</sub> /L1 | 1.4 | 71.4 | 28.6 |
| 7 | Co(acac) <sub>2</sub> /L1 | 0.6 | 50.0 | 50.0 |
| 8 | Ni(acac) <sub>2</sub> /L1 | 2.1 | 9.5  | 90.5 |

Reaction conditions: **1a** (2.00 mmol), (MeO)<sub>3</sub>SiH (4.00 mmol), **metal salt** (0.100 mmol), L1 (0.100 mmol), toluene (2.00 mL) at 50 °C for 6 h. Yield was determined by GC.

**Table S2. Evaluation of different copper salts**

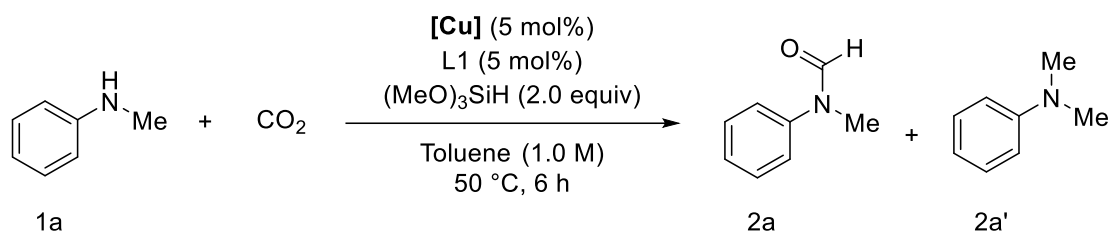

| Entry | Catalyst                  | Yield (%) | Select.(%) |      |
|-------|---------------------------|-----------|------------|------|
|       |                           |           | 2a         | 2a'  |
| 1     | Cu(OAc) <sub>2</sub>      | 0.3       | 66.7       | 33.3 |
| 2     | L1                        | 0.4       | 75.0       | 25.0 |
| 3     | Cu(OAc) <sub>2</sub> /L1  | 98.6      | 95.4       | 4.6  |
| 4     | Cu(acac) <sub>2</sub> /L1 | 81.8      | 97.7       | 2.3  |
| 5     | Cu(acac) <sub>2</sub> /L1 | 81.8      | 97.7       | 2.3  |
| 6     | CuBr <sub>2</sub> /L1     | 1.4       | 35.7       | 64.3 |
| 7     | CuI/L1                    | 0.3       | 33.3       | 66.7 |
| 8     | CuBr/L1                   | 0.2       | 50.0       | 50.0 |

Reaction conditions: **1a** (2.00 mmol), (MeO)<sub>3</sub>SiH (4.00 mmol), **[Cu]** (0.100 mmol), **L1** (0.100 mmol), toluene (2.00 mL) at 50 °C for 6 h. Yield was determined by GC.

**Table S3. Evaluation of different proportions of L1 and Cu(OAc)<sub>2</sub>**

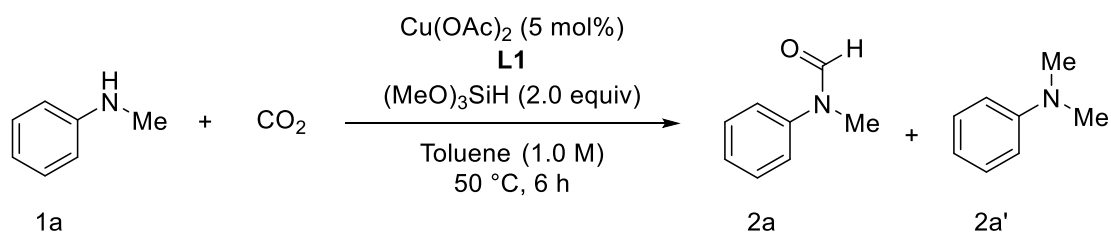

| Entry | Cu(OAc) <sub>2</sub> :L1 | Yield (%) | Select.(%) |     |
|-------|--------------------------|-----------|------------|-----|
|       |                          |           | 2a         | 2a' |
| 1     | 1:1                      | 98.6      | 95.4       | 4.6 |
| 2     | 1:2                      | 93.7      | 97.0       | 3.0 |
| 3     | 1:3                      | 86.3      | 95.7       | 4.3 |

Reaction conditions: **1a** (2.00 mmol), (MeO)<sub>3</sub>SiH (4.00 mmol), Cu(OAc)<sub>2</sub> (0.100 mmol), **L1** (0.100 mmol), toluene (2.00 mL) at 50 °C for 6 h. Yield was determined by GC.

**Table S4. Evaluation of different reductant**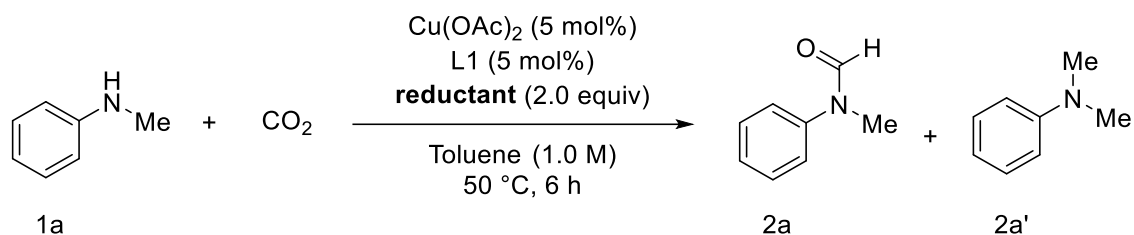

| Entry | reductant                  | Yield (%) | Select.(%) |     |
|-------|----------------------------|-----------|------------|-----|
|       |                            |           | 2a         | 2a' |
| 1     | $(\text{MeO})_3\text{SiH}$ | 98.6      | 95.4       | 4.6 |
| 2     | $\text{PhSiH}_3$           | 98.5      | 90.7       | 9.3 |
| 3     | $\text{Ph}_2\text{SiH}_2$  | 74.2      | 98.7       | 1.3 |
| 4     | $(\text{EtO})_3\text{SiH}$ | 69.2      | 98.6       | 1.4 |
| 5     | $\text{Et}_3\text{SiH}$    | -         | -          | -   |
| 6     | $\text{MeOH}$              | -         | -          | -   |
| 7     | H-bpin                     | -         | -          | -   |
| 8     | PMHS                       | -         | -          | -   |
| 9     | $\text{H}_2$               | -         | -          | -   |

Reaction conditions: **1a** (2.00 mmol), **Hydrosilane** (4.00 mmol),  $\text{Cu}(\text{OAc})_2$  (0.100 mmol), L1 (0.100 mmol), toluene (2.00 mL) at 50 °C for 6 h. Yield was determined by GC.

**Table S5. Evaluation of different amounts of reducing agents**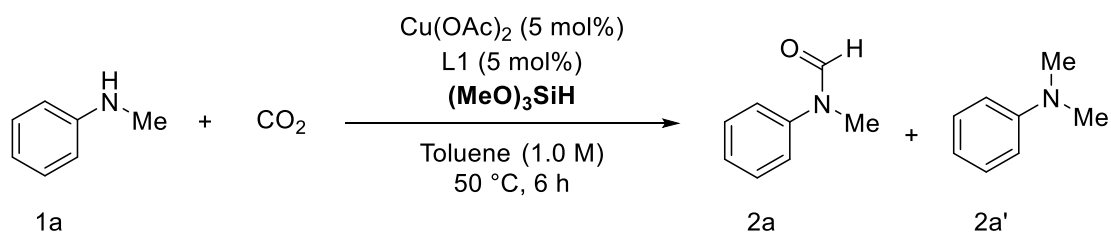

| Entry | $(\text{MeO})_3\text{SiH}$ (equiv.) | Yield (%) | Select.(%) |     |
|-------|-------------------------------------|-----------|------------|-----|
|       |                                     |           | 2a         | 2a' |
| 1     | 2.0                                 | 98.6      | 95.4       | 4.6 |
| 2     | 3.0                                 | 99.7      | 97.4       | 2.6 |
| 3     | 4.0                                 | 99.2      | 95.6       | 4.4 |

Reaction conditions: **1a** (2.00 mmol),  $\text{Cu}(\text{OAc})_2$  (0.100 mmol), L1 (0.100 mmol),  $(\text{MeO})_3\text{SiH}$  (equiv.) toluene (2.00 mL) at 50 °C for 6 h. Yield was determined by GC.

**Table S6. Evaluation of different amounts of catalyst**

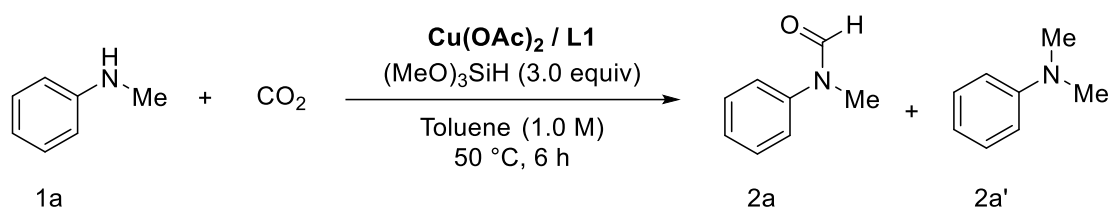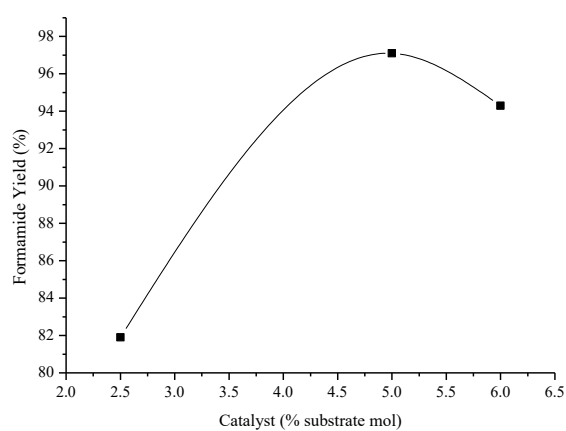

Reaction conditions: **1a** (2.00 mmol),  $(\text{MeO})_3\text{SiH}$  (6.00 mmol), toluene (2.00 mL) at 50 °C for 6 h.

Yield was determined by GC.

**Table S7. Evaluation of different reaction temperature and time**

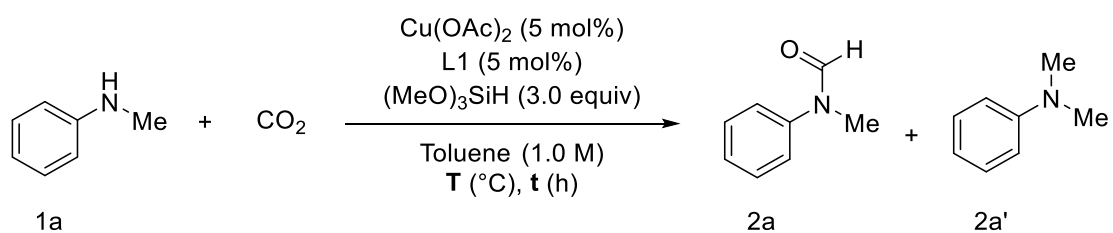

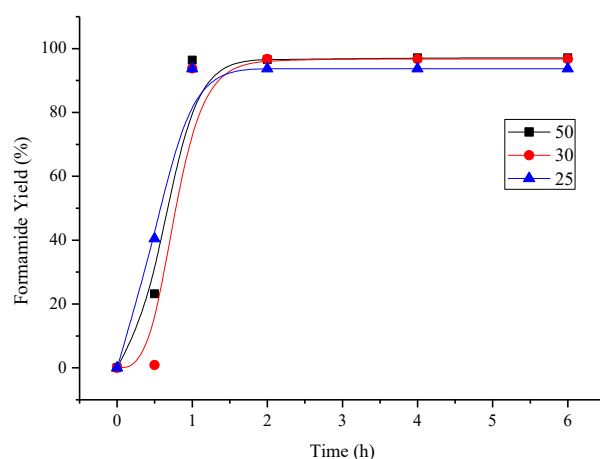

Reaction conditions: **1a** (2.00 mmol), (MeO)<sub>3</sub>SiH (6.00 mmol), toluene (2.00 mL) at **T** °C for **t** h.

Yield was determined by GC.

**Table S8. Evaluation of different solvents**

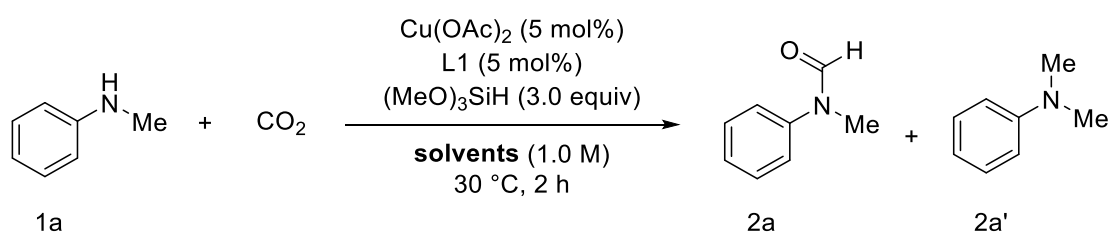

| Entry | Solvent                         | Yield (%) | Select.(%) |      |
|-------|---------------------------------|-----------|------------|------|
|       |                                 |           | 2a         | 2a'  |
| 1     | Toluene                         | 99.7      | 97.4       | 2.6  |
| 2     | THF                             | 89.3      | 96.2       | 3.8  |
| 3     | CH <sub>2</sub> Cl <sub>2</sub> | 79.2      | 93.2       | 6.8  |
| 4     | CH <sub>3</sub> CN              | 58.2      | 92.4       | 7.6  |
| 5     | DMF                             | 37.1      | 90.6       | 9.4  |
| 6     | DMSO                            | 20.2      | 84.7       | 15.3 |

Reaction conditions: **1a** (2.00 mmol), (MeO)<sub>3</sub>SiH (6.00 mmol), Cu(OAc)<sub>2</sub> (0.100 mmol), L1 (0.100 mmol), **solvent** (2.00 mL) at 30 °C for 2 h. Yield was determined by GC.

**Table S9. Evaluation of different ligands**

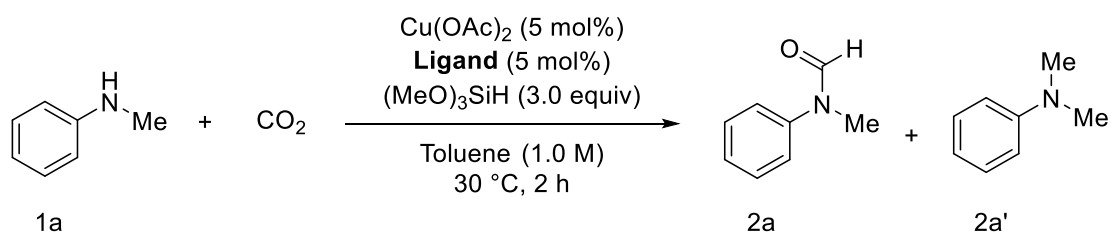

| Entry | Ligand | Yield (%) | Select.(%) |     |
|-------|--------|-----------|------------|-----|
|       |        |           | 2a         | 2a' |
| 1     | L1     | 99.7      | 97.4       | 2.6 |
| 2     | L2     | 92.6      | 98.6       | 1.4 |
| 3     | L3     | 99.8      | 97.0       | 3.0 |
| 4     | L4     | 74.3      | 97.7       | 2.3 |
| 5     | L5     | 12.4      | 97.6       | 2.4 |
| 6     | L6     | 95.4      | 99.8       | 0.2 |
| 7     | L7     | 99.6      | 97.4       | 2.6 |
| 8     | L8     | 99.5      | 98.1       | 1.9 |
| 9     | L9     | 99.5      | 97.4       | 2.6 |
| 10    | L10    | 95.2      | 97.5       | 2.5 |
| 11    | L11    | 95.9      | 94.3       | 5.7 |

Reaction conditions: **1a** (2.00 mmol), (MeO)<sub>3</sub>SiH (6.00 mmol), Cu(OAc)<sub>2</sub> (0.100 mmol), **Ligand** (0.100 mmol), toluene (2.00 mL) at 30 °C for 2 h. Yield was determined by GC.

## IV. Substrate scope

### General Method C :

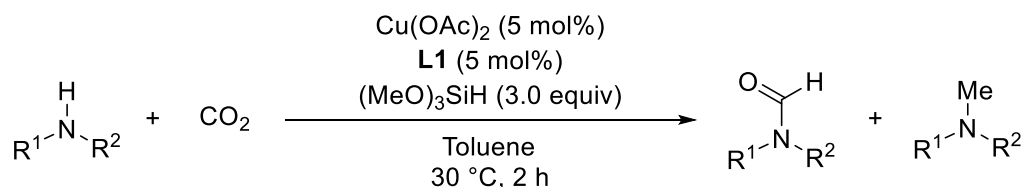

An 120 °C oven-dried 25-mL glass schlenck, equipped with a stirring bar, was charged with Cu(OAc)<sub>2</sub> (20.0 mg, 0.100 mmol, 0.0500 equiv), ligand L1 (74.5 mg, 0.100 mmol, 0.0500 equiv), amine (2.00 mmol, 1.00 equiv). The mixture was evacuated and backfilled with argon for three times. Then dry toluene (2.00 mL) was added under Ar. The schlenk tube was then connected to CO<sub>2</sub> gas and injected with (MeO)<sub>3</sub>SiH (733.2 mg, 6.00 mmol, 3.00 equiv). And the mixture was allowed to stir for 2 h at 30 °C. After the addition was complete, the mixture was diluted with saturated NaCl aqueous solution (15.0 mL) and ethyl acetate (15.0 mL). And the organic layers were separated. The aqueous layer was extracted with ethyl acetate (10.0 mL x 3). The combined organic layers were washed with saturated NaCl aqueous solution (15.0 mL x 3), dried over Na<sub>2</sub>SO<sub>4</sub> and filtered. The solvent was



removed by rotary evaporation and the residue was purified by flash silica gel chromatography.

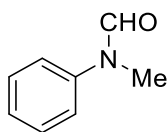

**N-methyl-N-phenylformamide 2a:** Prepared according to **General Method C** (Eluent: 100:1 to 10:1 petroleum ether: ethyl acetate) and the title compound was isolated as a light yellow liquid (210.9 mg, 1.560 mmol, 78.0%). **<sup>1</sup>H NMR** (400 MHz, CDCl<sub>3</sub>)  $\delta$  8.50 (1H, s), 7.44 (2H, t,  $J$  = 7.9 Hz), 7.34 – 7.26 (1H, m), 7.22 – 7.17 (2H, m), 3.34 (3H, s); **<sup>13</sup>C NMR** (101 MHz, CDCl<sub>3</sub>)  $\delta$  162.4, 142.2, 129.6, 126.4, 122.4, 32.1.

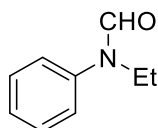

**N-ethyl-N-phenylformamide 2b:** Prepared according to **General Method C** (Eluent: 50:1 to 3:1 petroleum ether: ethyl acetate) and the title compound was isolated as a light yellow liquid (220.8 mg, 1.480 mmol, 74.0%). **<sup>1</sup>H NMR** (400 MHz, CDCl<sub>3</sub>)  $\delta$  8.32 (1H, s), 7.38 (2H, t,  $J$  = 7.8 Hz), 7.27 (1H, t,  $J$  = 7.4 Hz), 7.14 (2H, d,  $J$  = 7.4 Hz), 3.84 (2H, q,  $J$  = 7.2 Hz), 1.13 (3H, t,  $J$  = 7.2 Hz); **<sup>13</sup>C NMR** (101 MHz, CDCl<sub>3</sub>)  $\delta$  162.0, 140.8, 129.6, 126.8, 124.2, 40.0, 13.0.

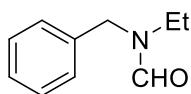

**N-benzyl-N-ethylformamide 2c:** Prepared according to **General Method C** (Eluent: 10:1 to 1:3 petroleum ether: ethyl acetate) and the title compound was isolated as a white solid (238.3 mg, 1.460 mmol, 73.0%). **<sup>1</sup>H NMR** (400 MHz, CDCl<sub>3</sub>)  $\delta$  8.18 (1H, d,  $J$  = 10.1 Hz), 7.34 – 7.11 (5H, m), 4.48 (1H, s), 4.32 (1H, s), 3.18 (2H, dq,  $J$  = 34.4, 7.2 Hz), 1.04 (3H, dt,  $J$  = 34.7, 7.2 Hz); **<sup>13</sup>C NMR** (101 MHz, CDCl<sub>3</sub>)  $\delta$  136.6, 136.3, 128.8, 128.6, 128.1, 128.0, 127.5, 127.5, 50.8, 44.8, 41.5, 36.8, 14.4, 12.2.

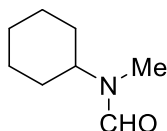

***N*-cyclohexyl-*N*-methylformamide (2d):** Prepared according to **General Method C** (Eluent: 5:1 to 1:5 petroleum ether: ethyl acetate) and the title compound was isolated as a colorless liquid (223.1 mg, 1.580 mmol, 79.0%). **<sup>1</sup>H NMR** (400 MHz, CDCl<sub>3</sub>)  $\delta$  8.08 (0.7H, s), 7.95 (0.3H, s), 4.17 – 4.09 (0.3H, m) 3.26 – 3.16 (0.7H, m), 2.77, 2.73 (3H, s), 1.81 – 0.99 (10H, m); **<sup>13</sup>C NMR** (101 MHz, CDCl<sub>3</sub>)  $\delta$  162.9, 162.5, 58.2, 50.8, 31.3, 30.2, 29.4, 25.9, 25.5, 25.4, 25.1.

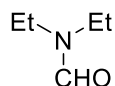

***N,N*-diethylformamide 2e:** Prepared according to **General Method C** (Eluent: 5:1 to 1:1 petroleum ether: ethyl acetate) and the title compound was isolated as a light yellow oil (169.9 mg, 1.680 mmol, 84.0%). **<sup>1</sup>H NMR** (400 MHz, CDCl<sub>3</sub>)  $\delta$  7.98 (1H, s), 3.26 (4H, dq,  $J$  = 34.2, 7.2 Hz), 1.10 (6H, dt,  $J$  = 24.4, 7.2 Hz); **<sup>13</sup>C NMR** (101 MHz, CDCl<sub>3</sub>)  $\delta$  161.3, 40.9, 35.6, 13.8, 11.7.

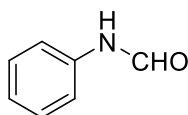

***N*-phenylformamide 2f:** Prepared according to **General Method C** (Eluent: 10:1 to 2:1 petroleum ether: ethyl acetate) and the title compound was isolated as a white solid (179.3 mg, 1.480 mmol, 74.0%). **<sup>1</sup>H NMR** (400 MHz, CDCl<sub>3</sub>)  $\delta$  9.30 (0.48H, s), 8.73 (1H, d,  $J$  = 11.3 Hz), 8.35 (0.52H, s), 7.63 – 7.56 (1H, m), 7.41 – 7.27 (2H, m), 7.25 – 7.09 (2H, m); **<sup>13</sup>C NMR** (101 MHz, CDCl<sub>3</sub>)  $\delta$  163.3, 159.9, 137.1, 136.9, 129.8, 129.1, 125.3, 124.8, 120.2, 118.8.

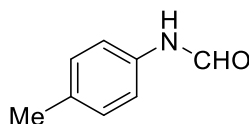

***N*-p-tolylformamide 2g:** Prepared according to **General Method C** (Eluent: 20:1 to 3:1 petroleum ether: ethyl acetate) and the title compound was isolated as a light yellow liquid (146.0 mg, 1.080 mmol, 54.0%). **<sup>1</sup>H NMR** (400 MHz, CDCl<sub>3</sub>)  $\delta$  8.85 (0.48H, d,  $J$  = 9.9 Hz), 8.55 (0.51H, d,  $J$  = 11.4 Hz), 8.21 (0.50H, d,  $J$  = 2.0 Hz), 8.07 (0.43H, s), 7.34 (1H, d,  $J$  = 8.4 Hz), 7.03 (2H, dd,  $J$  = 14.2, 8.2 Hz), 6.90 (1H, d,  $J$  = 8.4 Hz), 2.22 (3H, d,  $J$  = 9.7 Hz); **<sup>13</sup>C NMR** (101 MHz, CDCl<sub>3</sub>)  $\delta$  163.3, 159.6, 135.1,

134.5, 134.4, 134.3, 130.2, 129.5, 120.2, 119.1, 20.9, 20.8.

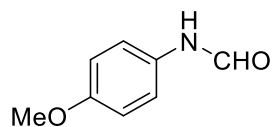

**N-(4-methoxyphenyl)formamide 2h:** Prepared according to **General Method C** (Eluent: 10:1 to 1:1 petroleum ether: ethyl acetate) and the title compound was isolated as a colorless liquid (151.2 mg, 1.000 mmol, 50.0%). **<sup>1</sup>H NMR** (400 MHz, CDCl<sub>3</sub>)  $\delta$  8.45 (0.45H, d,  $J$  = 11.6), 8.27 – 8.12 (1H, m), 7.47 (0.44H, s), 7.38 (1H, d,  $J$  = 9.0 Hz), 6.97 (1H, d,  $J$  = 8.9 Hz), 6.80 (2H, dd,  $J$  = 12.5, 8.9 Hz), 3.72 (3H, d,  $J$  = 6.1 Hz); **<sup>13</sup>C NMR** (101 MHz, CDCl<sub>3</sub>)  $\delta$  163.2, 159.1, 157.6, 156.7, 130.0, 129.6, 121.8, 121.6, 114.9, 114.2, 55.6, 55.5.

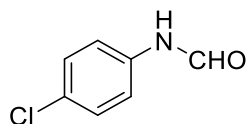

**N-(4-chlorophenyl)formamide 2i:** Prepared according to **General Method C** (Eluent: 10:1 to 3:1 petroleum ether: ethyl acetate) and the title compound was isolated as a white solid (205.4 mg, 1.320 mmol, 66.0%). **<sup>1</sup>H NMR** (400 MHz, CDCl<sub>3</sub>)  $\delta$  8.77 (0.43H, d,  $J$  = 11.6 Hz), 8.58 (0.5H, d,  $J$  = 11.3 Hz), 8.28 (0.66H, d,  $J$  = 1.8 Hz), 7.81 (0.61H, s), 7.43 (1H, d,  $J$  = 8.8 Hz), 7.23 (2H, dd,  $J$  = 17.2, 8.8 Hz), 6.97 (1H, d,  $J$  = 8.7 Hz); **<sup>13</sup>C NMR** (101 MHz, CDCl<sub>3</sub>)  $\delta$  162.8, 159.3, 135.5, 135.4, 130.7, 129.9, 129.1, 121.3, 120.0.

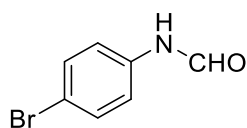

**N-(4-bromophenyl)formamide 2j:** Prepared according to **General Method C** (Eluent: 20:1 to 3:1 petroleum ether: ethyl acetate) and the title compound was isolated as a white solid (284.1 mg, 1.420 mmol, 71.0%). **<sup>1</sup>H NMR** (400 MHz, CDCl<sub>3</sub>)  $\delta$  8.73 – 8.54 (1H, m), 8.32 – 7.60 (1H, m), 7.43 – 7.33 (3H, m), 6.92 (1H, d,  $J$  = 8.8 Hz); **<sup>13</sup>C NMR** (101 MHz, CDCl<sub>3</sub>)  $\delta$  162.6, 159.2, 135.9, 135.9, 132.8, 132.1, 121.6, 120.3, 118.3, 117.5.

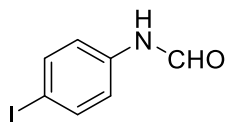

***N*-(4-iodophenyl)formamide 2k:** Prepared according to **General Method C** (Eluent: 20:1 to 3:1 petroleum ether: ethyl acetate) and the title compound was isolated as a white solid (281.6 mg, 1.140 mmol, 57.0%). **<sup>1</sup>H NMR** (400 MHz, CDCl<sub>3</sub>)  $\delta$  8.62 (1H, d,  $J$  = 10.6 Hz), 8.32 (1H, s), 7.58 (2H, dd,  $J$  = 12.0, 8.7 Hz), 7.26 (1H, d,  $J$  = 8.7 Hz), 6.80 (1H, d,  $J$  = 8.7 Hz); **<sup>13</sup>C NMR** (101 MHz, CDCl<sub>3</sub>)  $\delta$  162.4, 159.1, 138.7, 138.1, 136.6, 136.5, 121.8, 120.5, 88.7, 88.2.

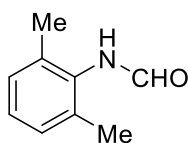

***N*-(2,6-dimethylphenyl)formamide 2l:** Prepared according to **General Method C** (Eluent: 20:1 to 1:1 petroleum ether: ethyl acetate) and the title compound was isolated as a white solid (217.8 mg, 1.460 mmol, 73.0%). **<sup>1</sup>H NMR** (400 MHz, DMSO-*d*<sub>6</sub>)  $\delta$  9.47 (0.79H, s), 9.30 (0.17H, d,  $J$  = 11.6 Hz), 8.25 (0.80H, s), 8.00 (0.15H, d,  $J$  = 11.6 Hz), 7.09 (3H, d,  $J$  = 15.8 Hz), 2.18 (6H, d,  $J$  = 25.6 Hz); **<sup>13</sup>C NMR** (101 MHz, DMSO-*d*<sub>6</sub>)  $\delta$  164.7, 159.3, 134.7, 134.5, 134.0, 128.3, 127.7, 126.5, 18.3.

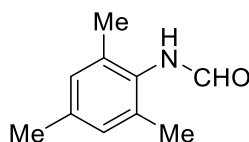

***N*-mesitylformamide 2m:** Prepared according to **General Method C** (Eluent: 20:1 to 1:1 petroleum ether: ethyl acetate) and the title compound was isolated as a white solid (274.2 mg, 1.680 mmol, 84.0%). **<sup>1</sup>H NMR** (400 MHz, DMSO-*d*<sub>6</sub>)  $\delta$  9.36 (0.75H, s), 9.19 (0.17H, d,  $J$  = 11.6 Hz), 8.23 (0.76H, s), 7.93 (0.16H, d,  $J$  = 11.5 Hz), 6.92 (0.34H, s), 6.87 (1.52H, s), 2.21 (3H, s), 2.17 (1H, s), 2.10 (5H, s); **<sup>13</sup>C NMR** (101 MHz, DMSO-*d*<sub>6</sub>)  $\delta$  164.7, 159.4, 135.5, 134.7, 134.4, 131.3, 128.8, 128.3, 20.4, 18.3, 18.2.

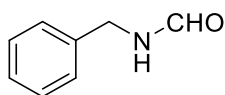

**N-benzylformamide 2n:** Prepared according to **General Method C** (Eluent: 10:1 to 1:3 petroleum ether: ethyl acetate) and the title compound was isolated as a white solid (205.5 mg, 1.520 mmol, 76.0%). **<sup>1</sup>H NMR** (400 MHz, CDCl<sub>3</sub>)  $\delta$  8.06 (0.83H, s), 7.97 (0.12H, d,  $J$  = 11.6), 7.20 (5H, dt,  $J$  = 23.6, 7.7 Hz), 6.56 (1H, s), 4.31 (1.7H, d,  $J$  = 6.1 Hz), 4.25 (0.28H, d,  $J$  = 6.4 Hz); **<sup>13</sup>C NMR** (101 MHz, CDCl<sub>3</sub>)  $\delta$  164.9, 161.4, 137.7, 128.9, 128.7, 127.7, 127.6, 127.0, 45.7, 42.1.

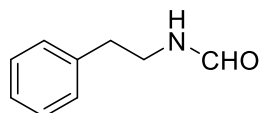

**N-phenethylformamide 2o:** Prepared according to **General Method C** (Eluent: 20:1 to 1:5 petroleum ether: ethyl acetate) and the title compound was isolated as a light yellow liquid (191.0 mg, 1.280 mmol, 64.0%). **<sup>1</sup>H NMR** (400 MHz, CDCl<sub>3</sub>)  $\delta$  8.05 (0.90H, s), 7.80 (0.17H, d,  $J$  = 12.5 Hz), 7.31 (2H, t,  $J$  = 7.2 Hz), 7.21 (3H, m), 6.34 (1H, s), 3.48 (2H, dq,  $J$  = 39.3, 6.6 Hz), 2.83 (2H, t,  $J$  = 7.1 Hz); **<sup>13</sup>C NMR** (101 MHz, CDCl<sub>3</sub>)  $\delta$  164.7, 161.5, 138.6, 128.9, 128.8, 128.8, 128.7, 126.9, 126.6, 43.3, 39.3, 37.7, 35.5.

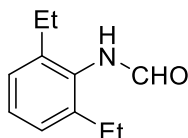

**N-(2,6-diethylphenyl)formamide 2p:** Prepared according to **General Method C** (Eluent: 20:1 to 1:1 petroleum ether: ethyl acetate) and the title compound was isolated as a white solid (251.7 mg, 1.420 mmol, 71.0%). **<sup>1</sup>H NMR** (400 MHz, CDCl<sub>3</sub>)  $\delta$  8.29 (0.42H, s), 7.99 (0.54H, d,  $J$  = 11.8 Hz), 7.56 (1H, s), 7.20 – 7.03 (3H, m), 2.59 (2H, q,  $J$  = 7.5 Hz), 2.52 (2H, q,  $J$  = 7.6 Hz), 1.12 (6H, q,  $J$  = 7.7 Hz); **<sup>13</sup>C NMR** (101 MHz, CDCl<sub>3</sub>)  $\delta$  165.4, 160.3, 142.0, 141.4, 131.8, 131.2, 128.5, 128.4, 126.9, 126.4, 25.0, 24.9, 14.8, 14.5.

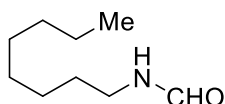

**N-octylformamide 2q:** Prepared according to **General Method C** (Eluent: 5:1 to 1:5 petroleum ether: ethyl acetate) and the title compound was isolated as a colorless liquid (257.9 mg, 1.640 mmol, 82.0%). **<sup>1</sup>H NMR** (400 MHz, CDCl<sub>3</sub>)  $\delta$  7.99 (0.82H, s),

7.89 (0.13H, d,  $J = 12.3$ ), 6.94 (1H, s), 3.12 (2H, q,  $J = 6.6$  Hz), 1.39 (2H, t,  $J = 7.0$  Hz), 1.27 – 1.05 (10H, m), 0.75 (3H, t,  $J = 6.4$  Hz);  $^{13}\text{C}$  NMR (101 MHz,  $\text{CDCl}_3$ )  $\delta$  161.6, 38.1, 31.7, 29.3, 29.1, 29.1, 26.8, 22.5, 14.0.

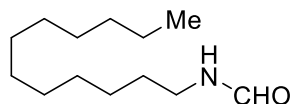

***N*-dodecylformamide 2r:** Prepared according to **General Method C** (Eluent: 1:1 to 1:2 petroleum ether: ethyl acetate) and the title compound was isolated as a white solid (341.4 mg, 1.600 mmol, 80.0%).  $^1\text{H}$  NMR (400 MHz,  $\text{CDCl}_3$ )  $\delta$  8.04 (1H, s), 6.66 (1H, s), 3.23 – 3.06 (2H, m), 1.43 (2H, t,  $J = 7.1$  Hz), 1.19 (18H, d,  $J = 14.6$  Hz), 0.79 (3H, t,  $J = 6.6$  Hz);  $^{13}\text{C}$  NMR (101 MHz,  $\text{CDCl}_3$ )  $\delta$  161.5, 38.2, 31.9, 29.6, 29.6, 29.6, 29.5, 29.5, 29.4, 29.3, 29.2, 26.9, 22.6, 14.1.

## V. Mechanistic studies

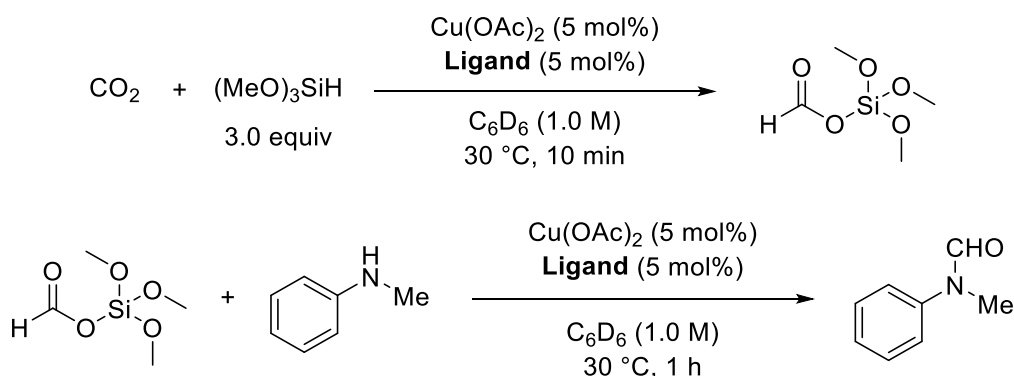

An 120 °C oven-dried 25-mL glass schlenck, equipped with a stirring bar, was charged with  $\text{Cu}(\text{OAc})_2$  (20.0 mg, 0.100 mmol, 0.0500 equiv), ligand L1 (74.5 mg, 0.100 mmol, 0.0500 equiv). The mixture was evacuated and backfilled with argon for three times. Then  $\text{C}_6\text{D}_6$  (2.00 mL) was added under Ar. The schlenk tube was then connected to  $\text{CO}_2$  gas and injected with  $(\text{MeO})_3\text{SiH}$  (733.2 mg, 6.00 mmol, 3.00 equiv). And the mixture was allowed to stir for 10 min at 30 °C. The mixture was analyzed by  $^1\text{H}$  NMR. Then add *N*-methylaniline and stir for 1h at 30 °C. The mixture was analyzed by  $^1\text{H}$  NMR.

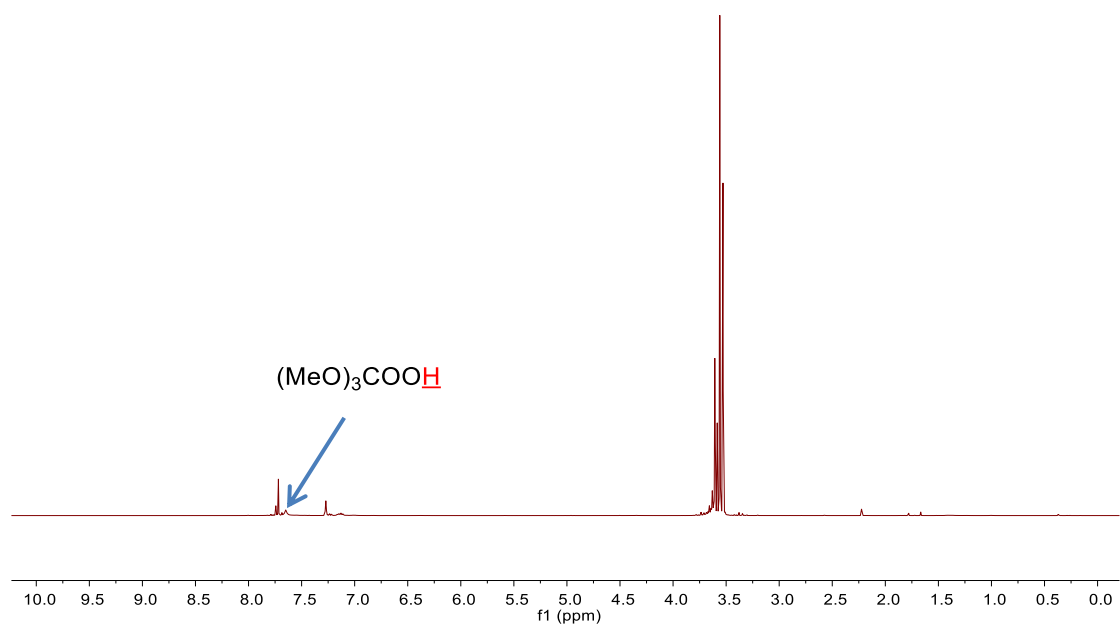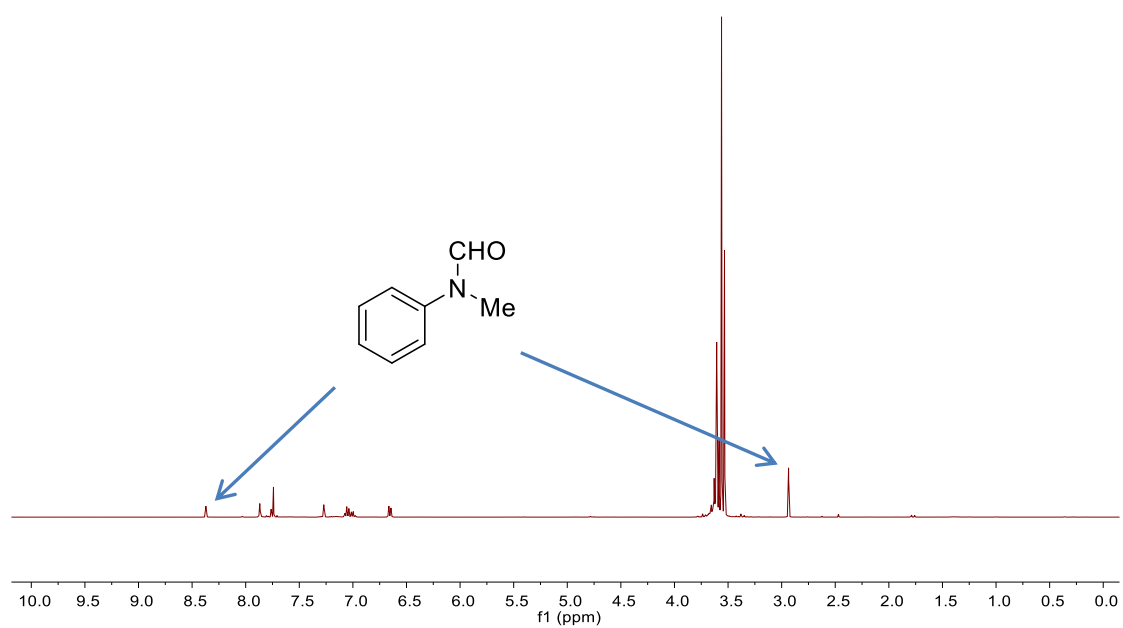

## VI. NMR spectra

$^1\text{H}$  NMR ( $\text{CDCl}_3$ ), 400 MHz

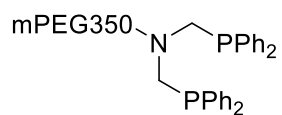

L1

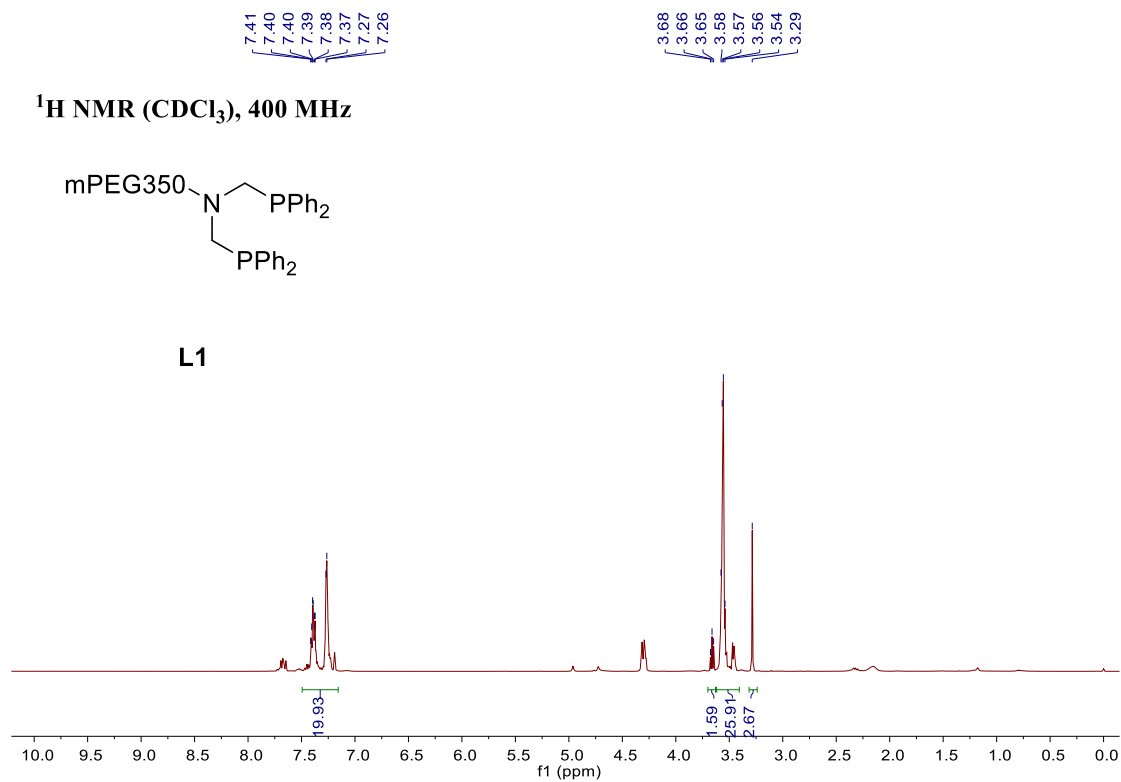

$^{13}\text{C}$  NMR ( $\text{CDCl}_3$ ), 101 MHz

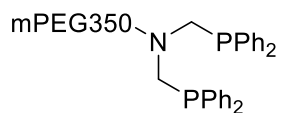

L1

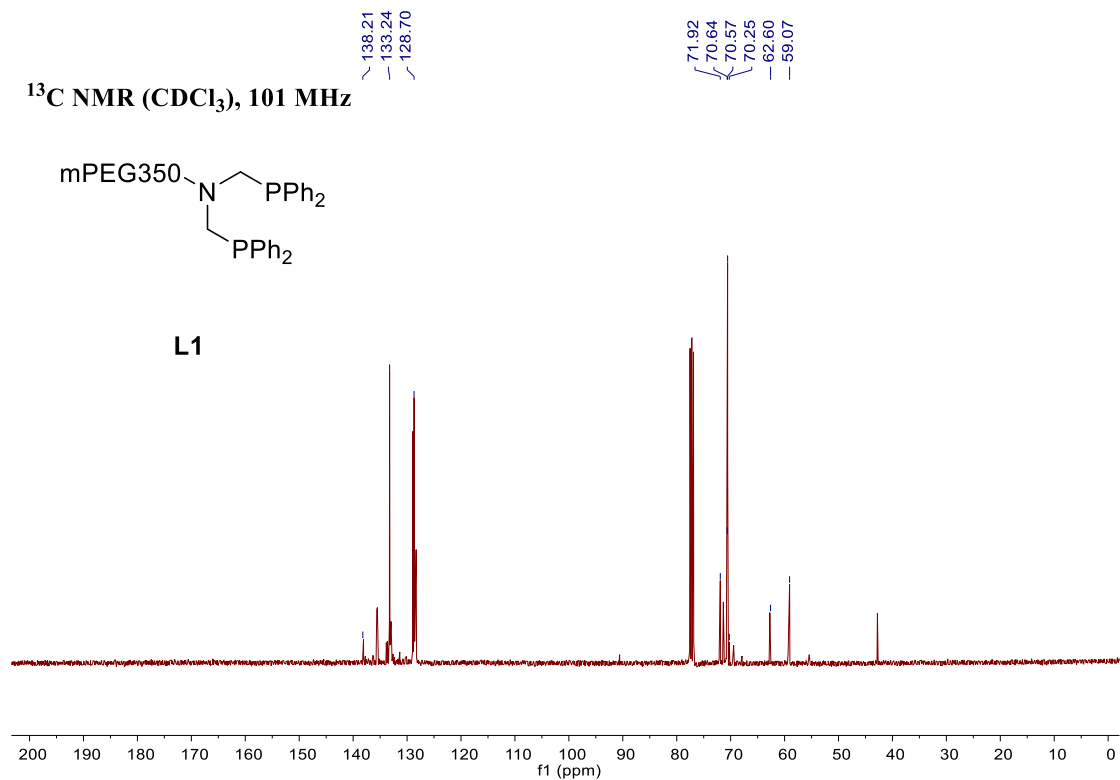



**$^{31}\text{P}$  NMR ( $\text{CDCl}_3$ ), 162 MHz**

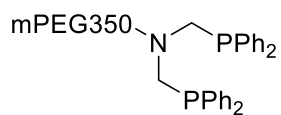

**L1**

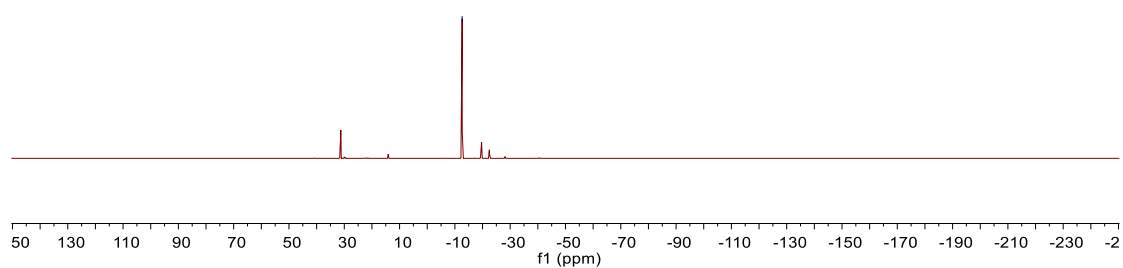

7.41  
7.40  
7.39  
7.38  
7.37  
7.33  
7.32  
7.31

3.67  
3.65  
3.64  
3.57  
3.56  
3.56  
3.28  
2.78  
2.76  
2.74  
2.72  
-2.33  
1.29  
1.28  
1.26  
1.25  
1.11  
1.10  
1.08  
1.06  
1.04  
0.77  
0.75  
0.73  
0.71

**$^1\text{H}$  NMR ( $\text{CDCl}_3$ ), 400 MHz**

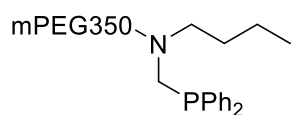

**L2**

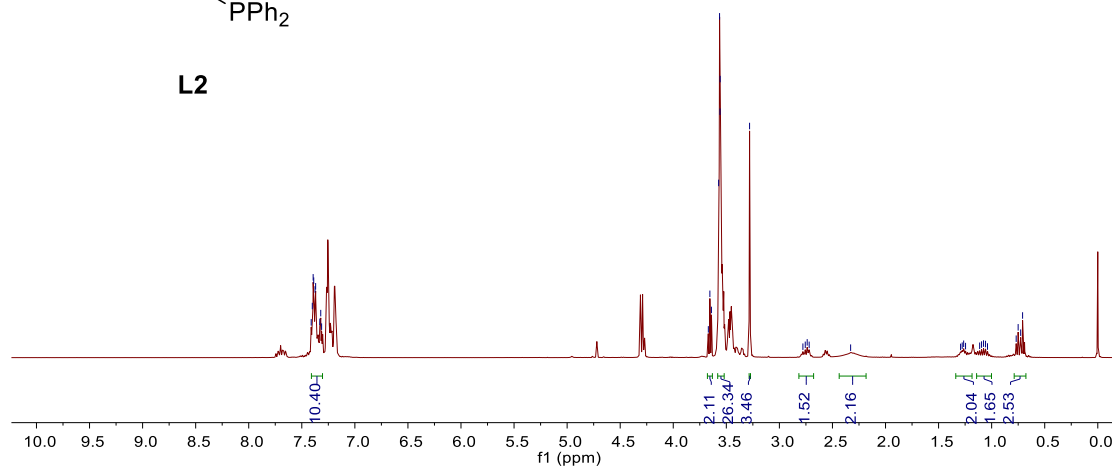

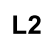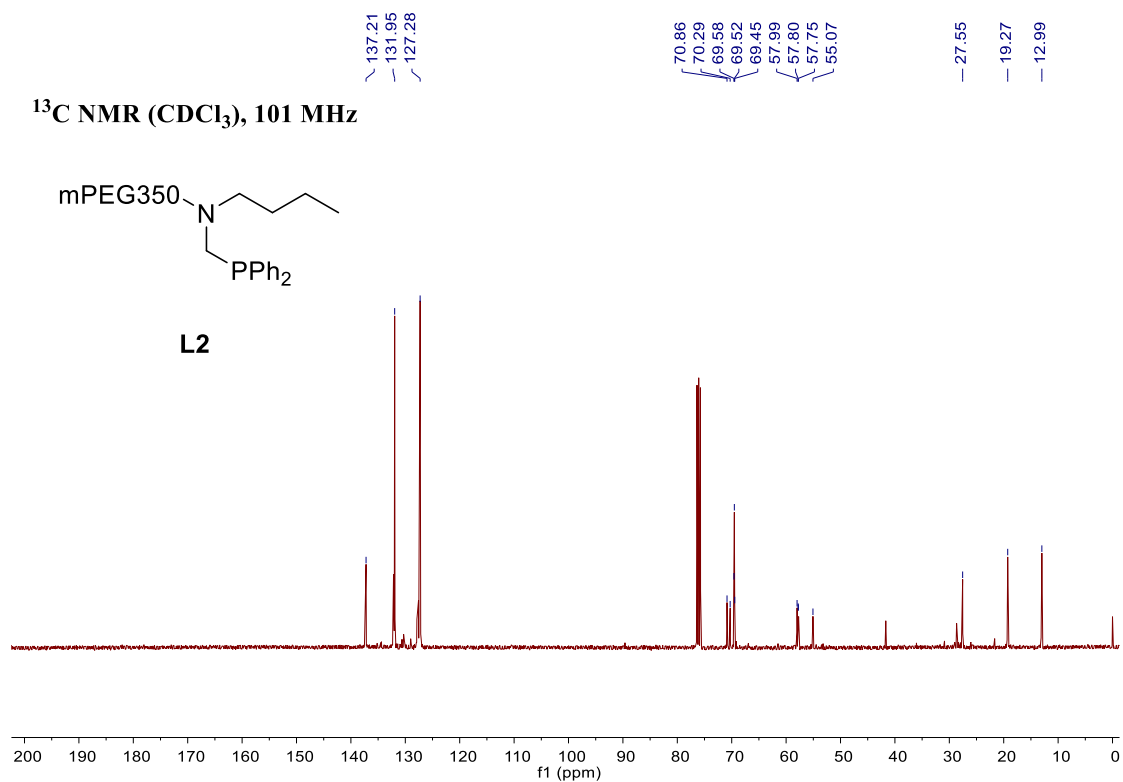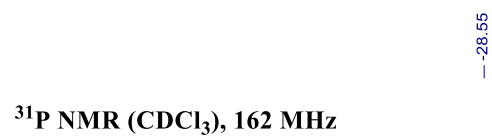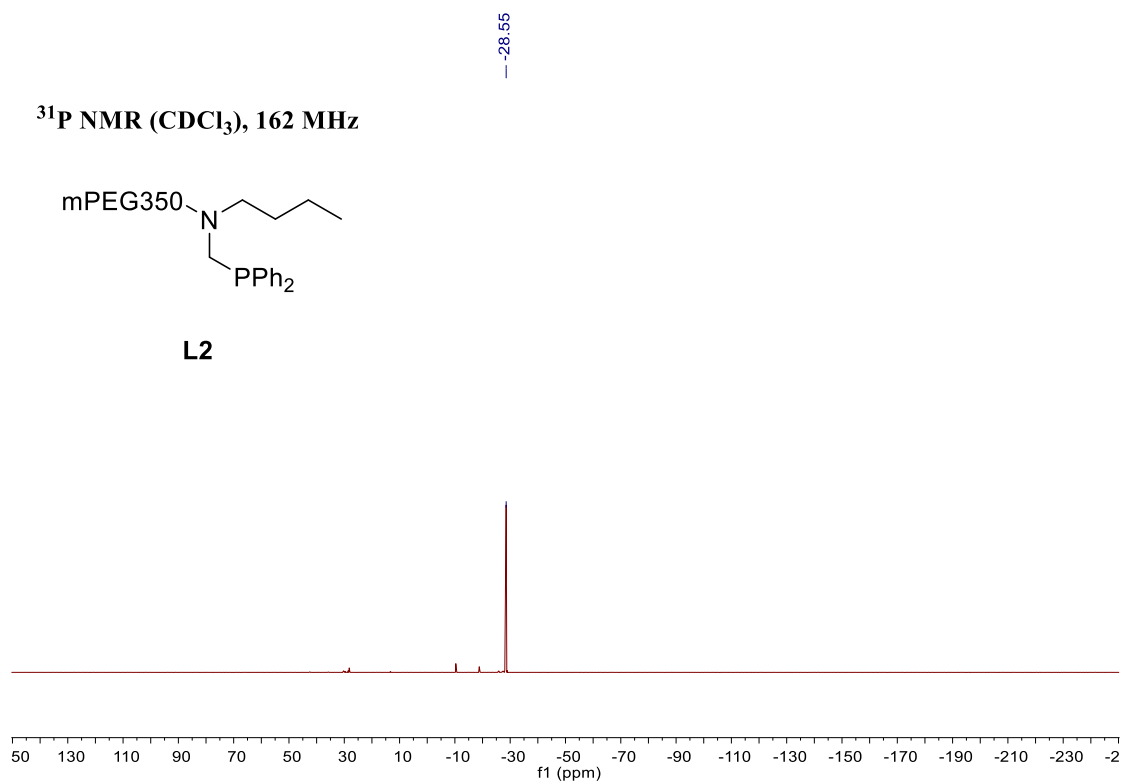



**$^{31}\text{P}$  NMR ( $\text{CDCl}_3$ ), 162 MHz**

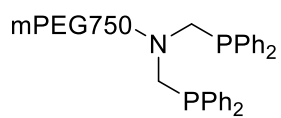

**L3**

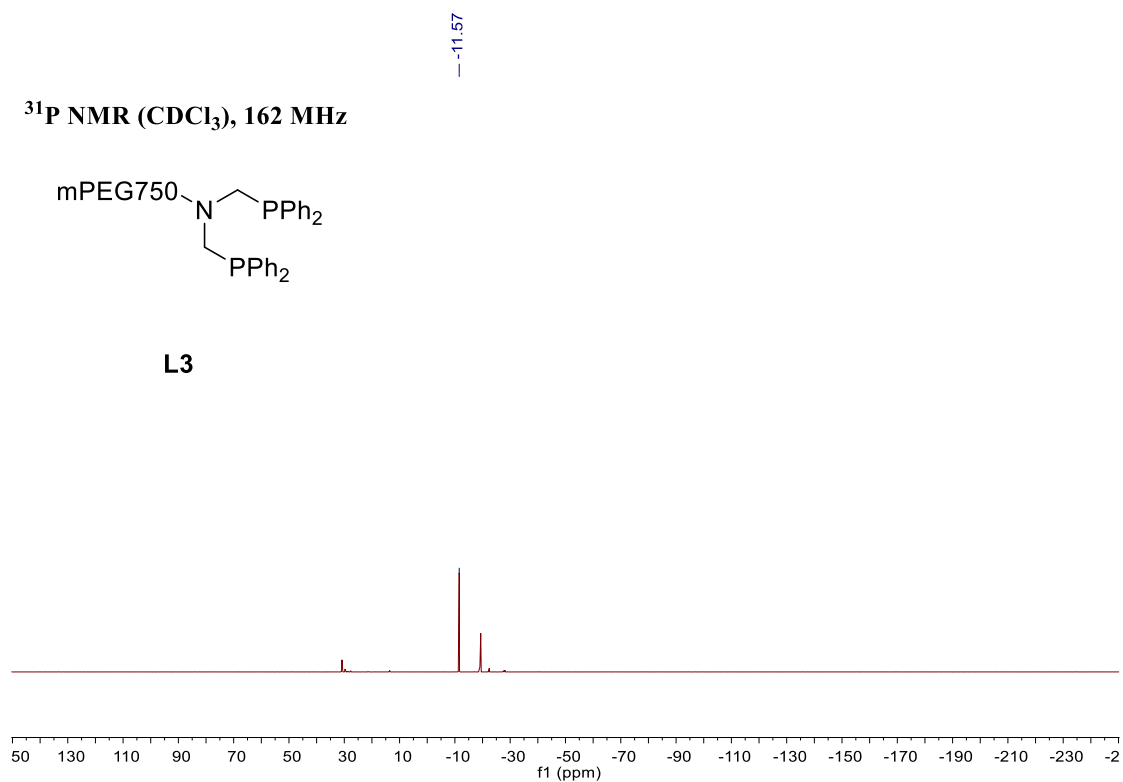

**$^1\text{H}$  NMR ( $\text{CDCl}_3$ ), 400 MHz**

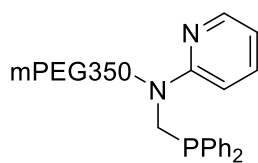

**L4**

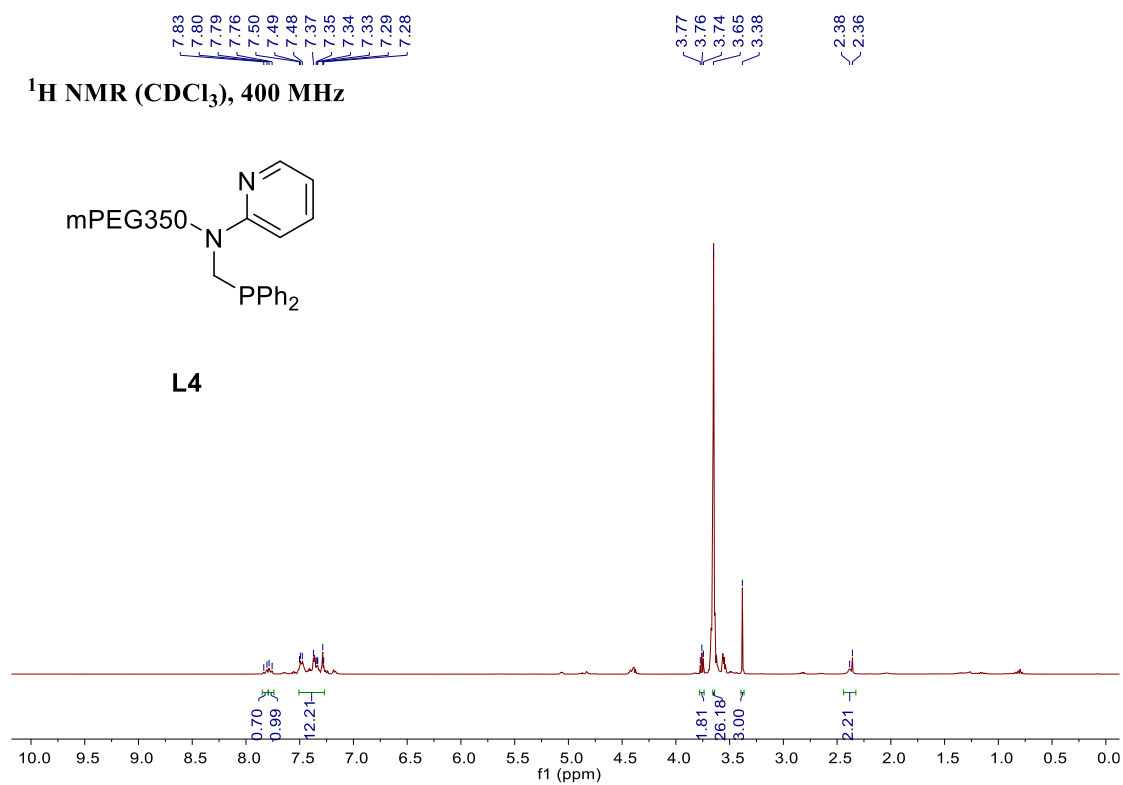

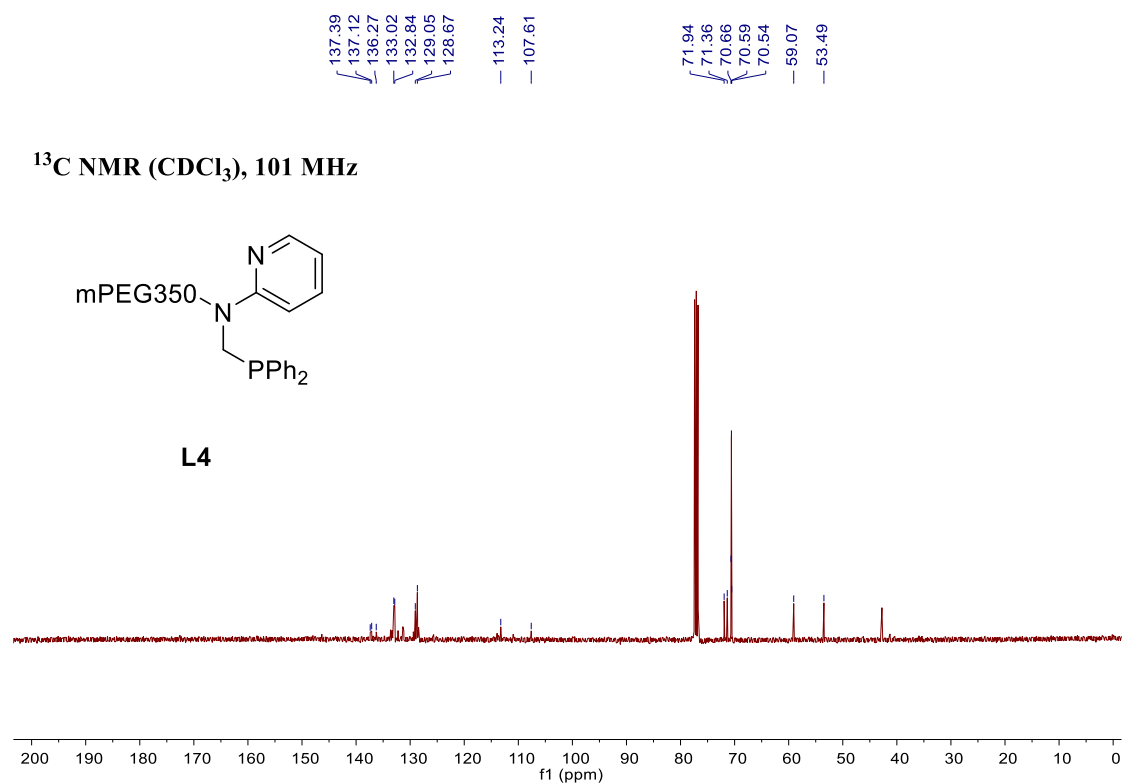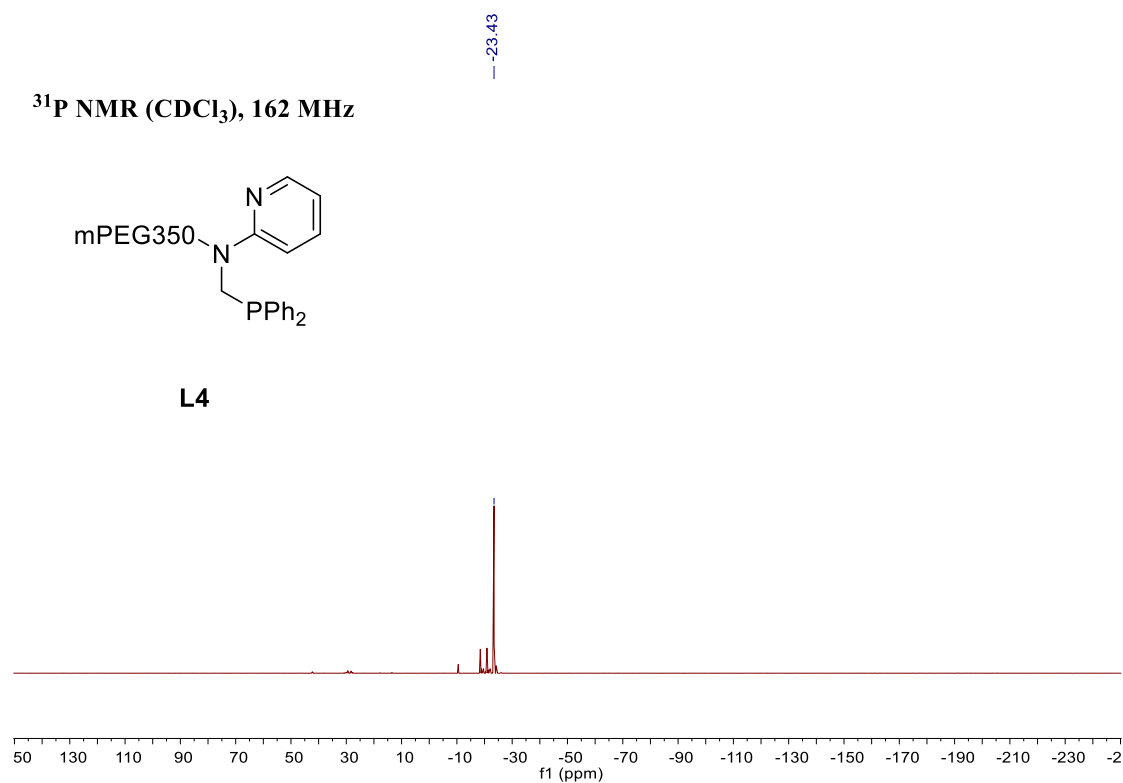

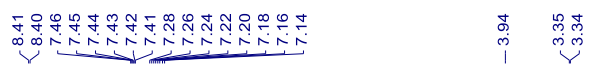

$^1\text{H}$  NMR ( $\text{CDCl}_3$ ), 400 MHz

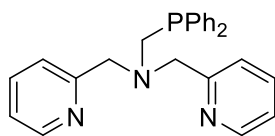

**L5**

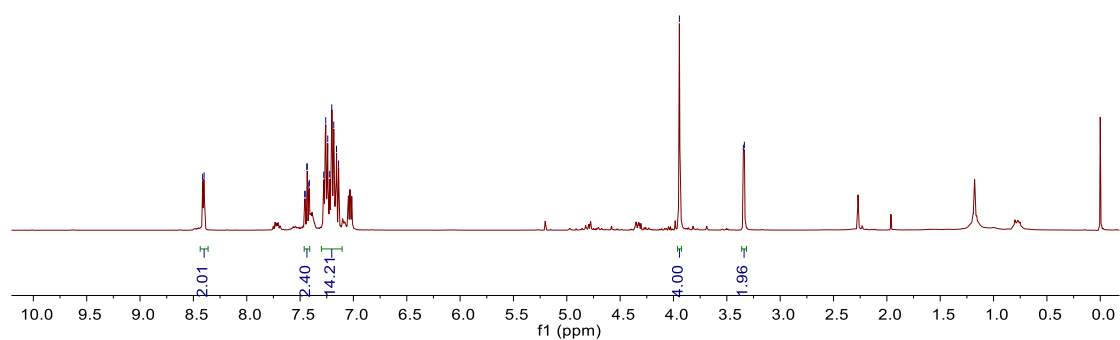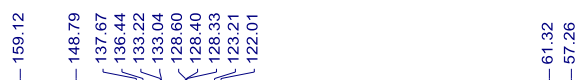

$^{13}\text{C}$  NMR ( $\text{CDCl}_3$ ), 101 MHz

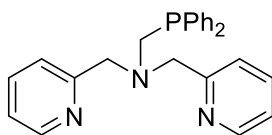

**L5**

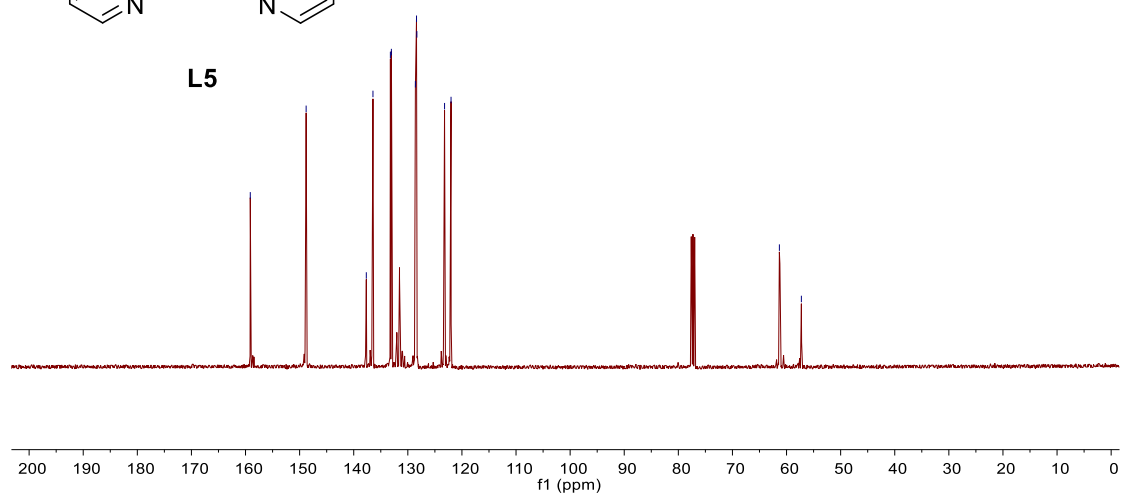

$^{31}\text{P}$  NMR ( $\text{CDCl}_3$ ), 162 MHz

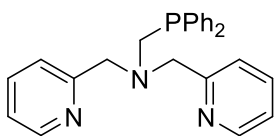

**L5**

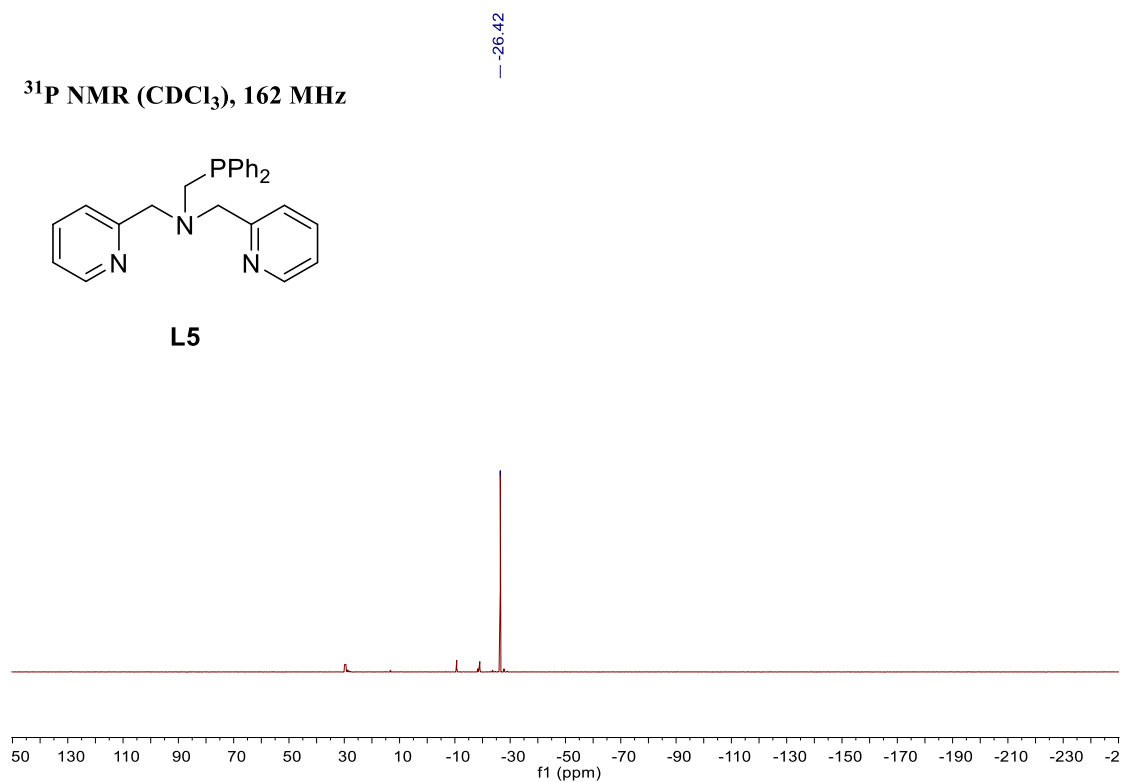

8.07  
8.07  
8.06  
8.05  
7.44  
7.43  
7.42  
7.41  
7.40  
7.32  
7.31  
7.30  
7.29  
7.28  
7.24  
7.22  
7.18  
6.49  
6.47  
6.46  
6.46  
6.44

4.14  
4.13

$^1\text{H}$  NMR ( $\text{CDCl}_3$ ), 400 MHz

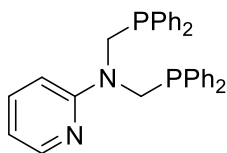

**L6**

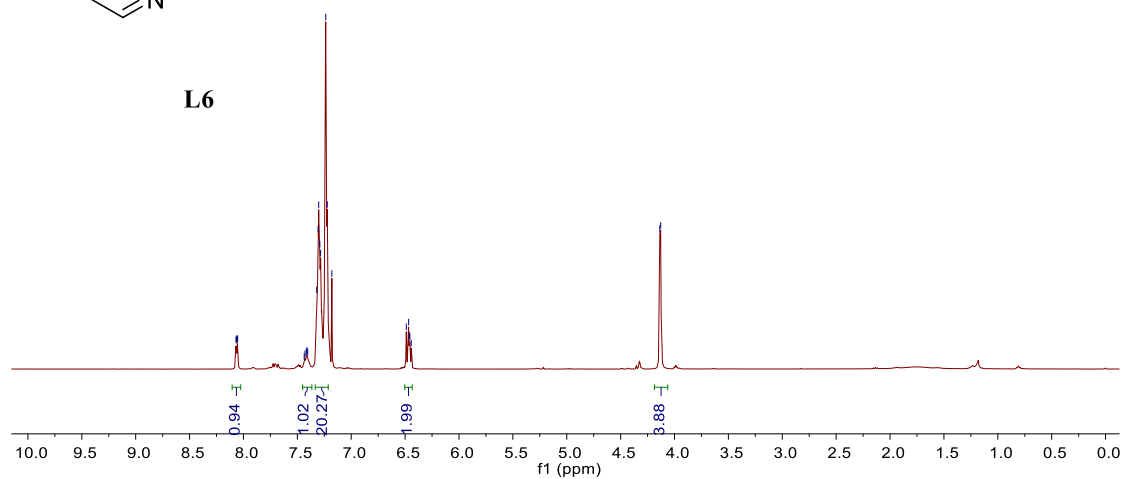

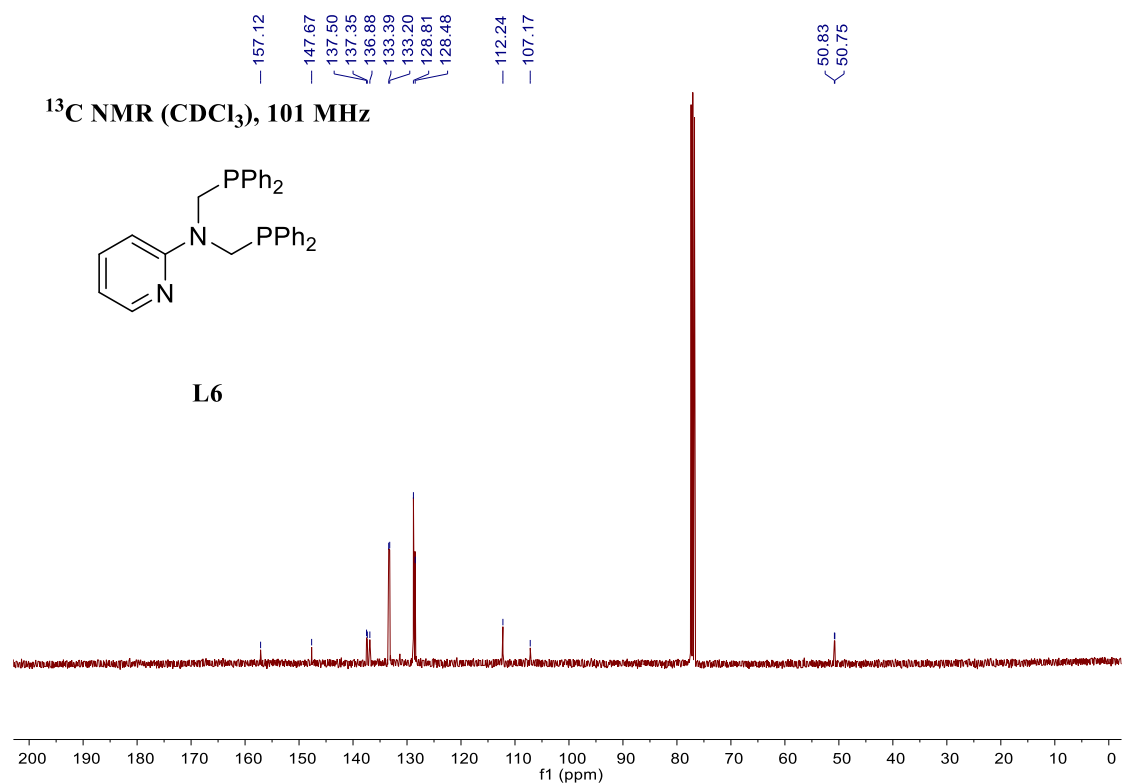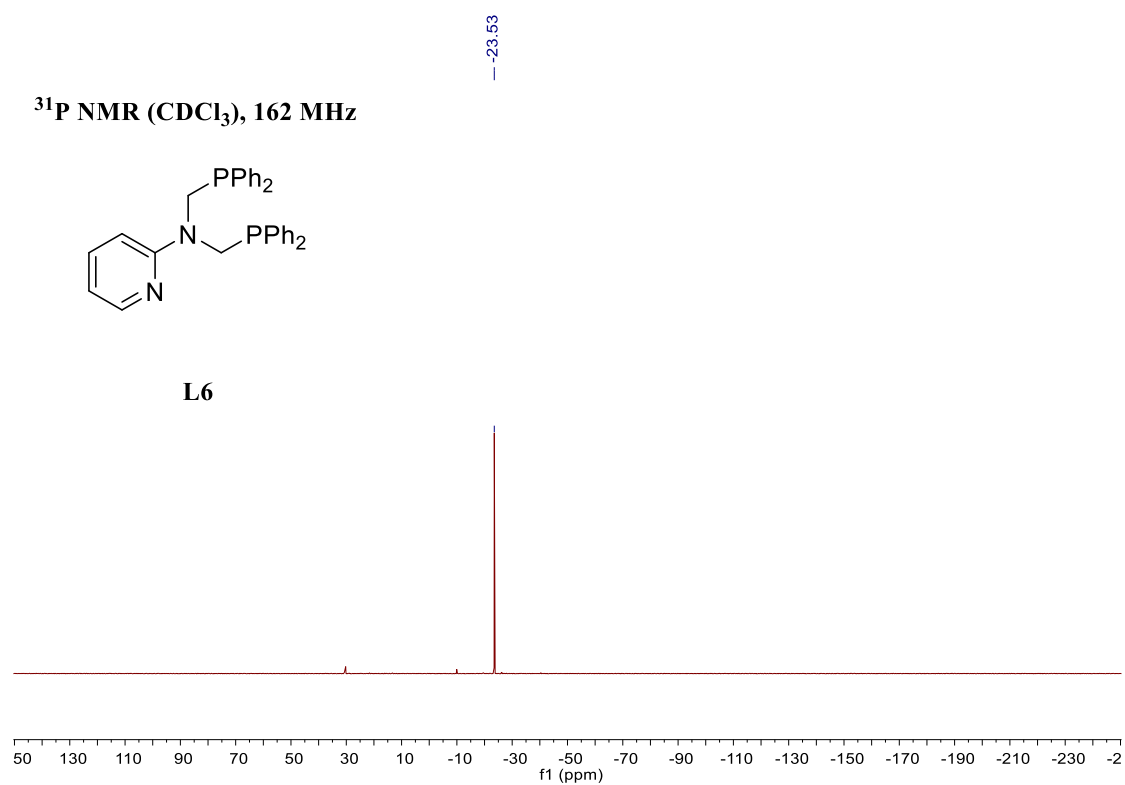





<sup>31</sup>P NMR (CDCl<sub>3</sub>), 162 MHz

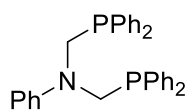

L7

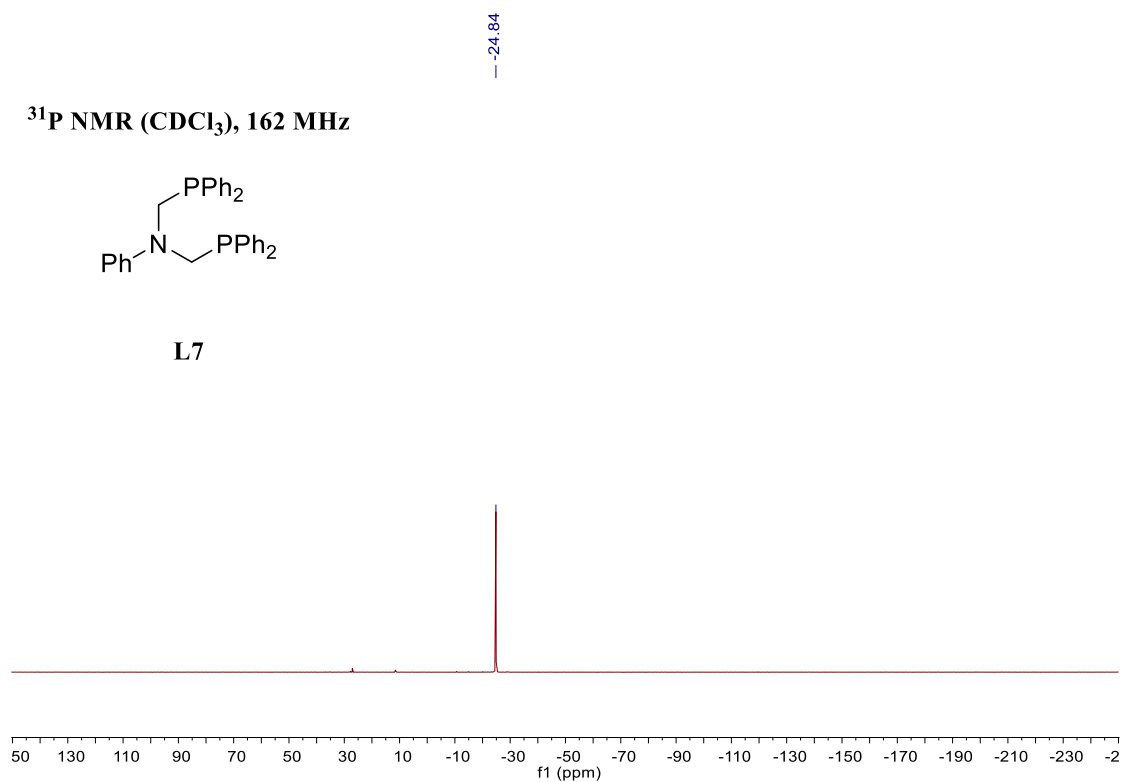

<sup>1</sup>H NMR (CDCl<sub>3</sub>), 400 MHz

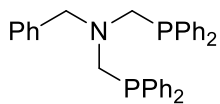

L8

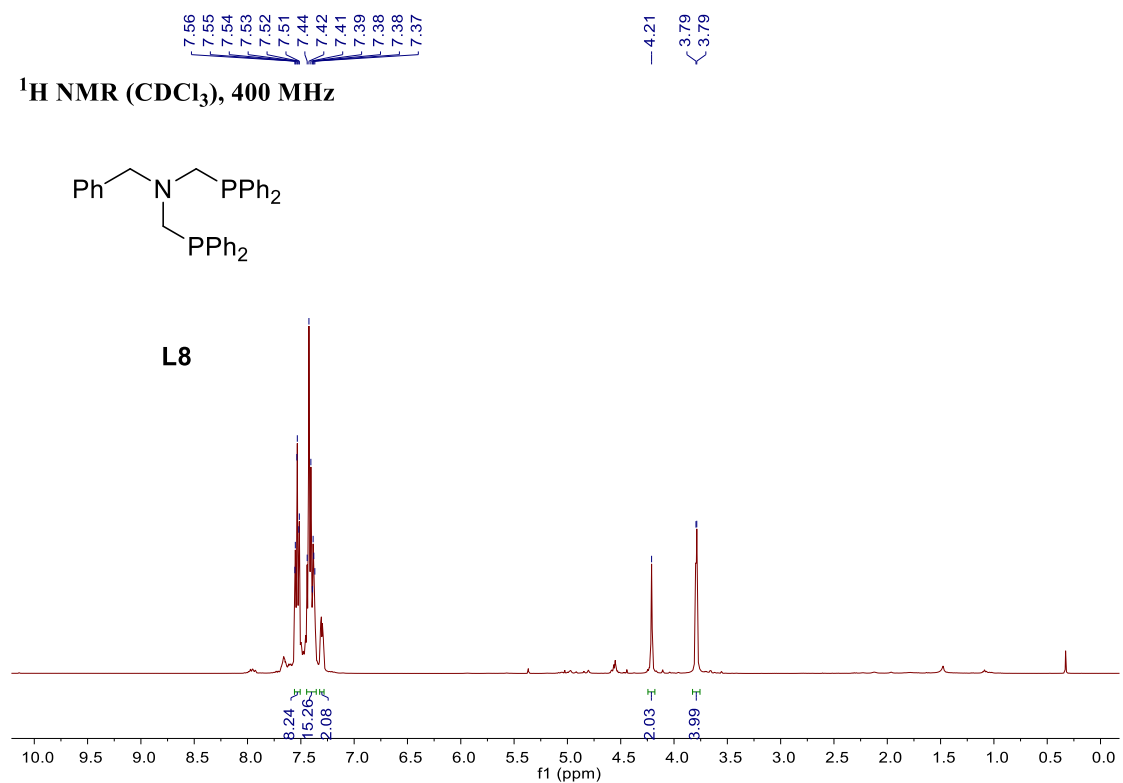

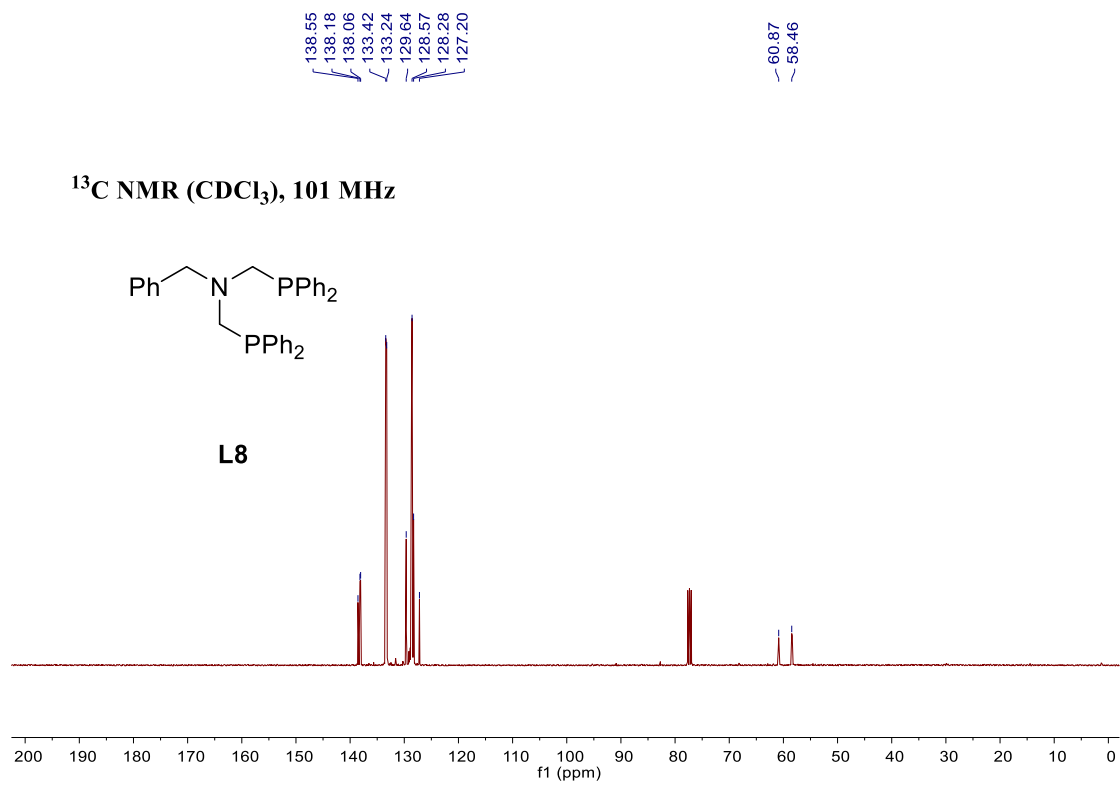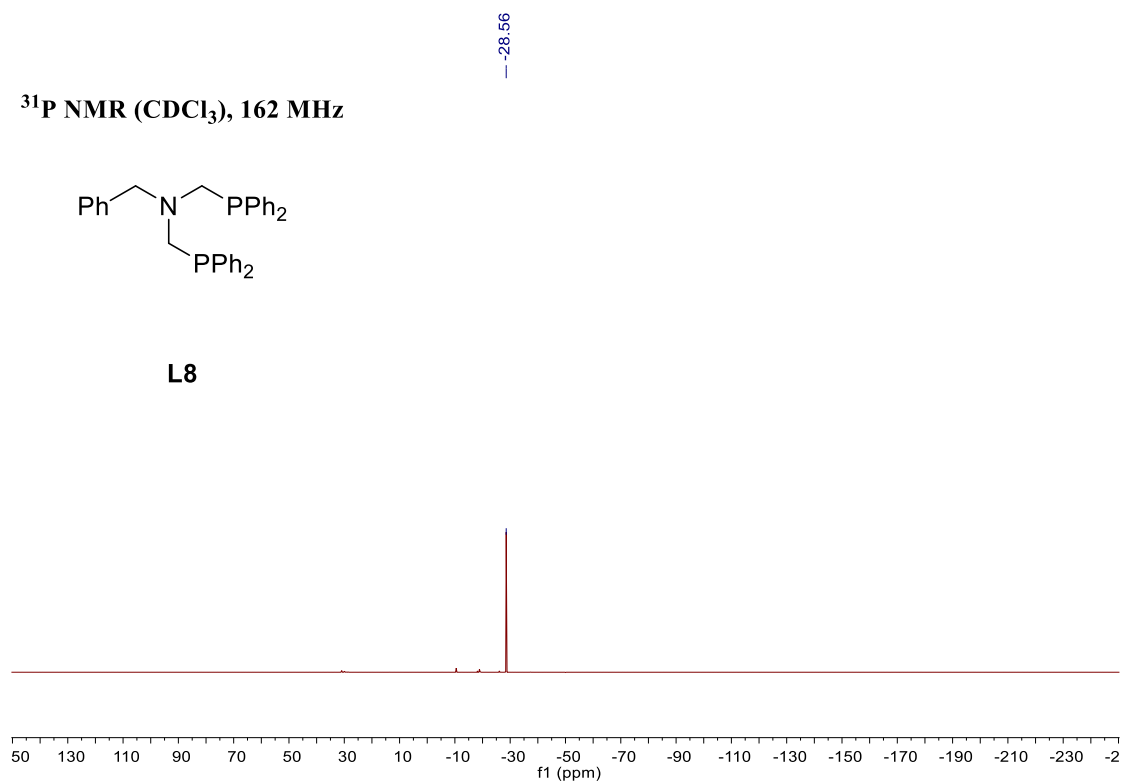

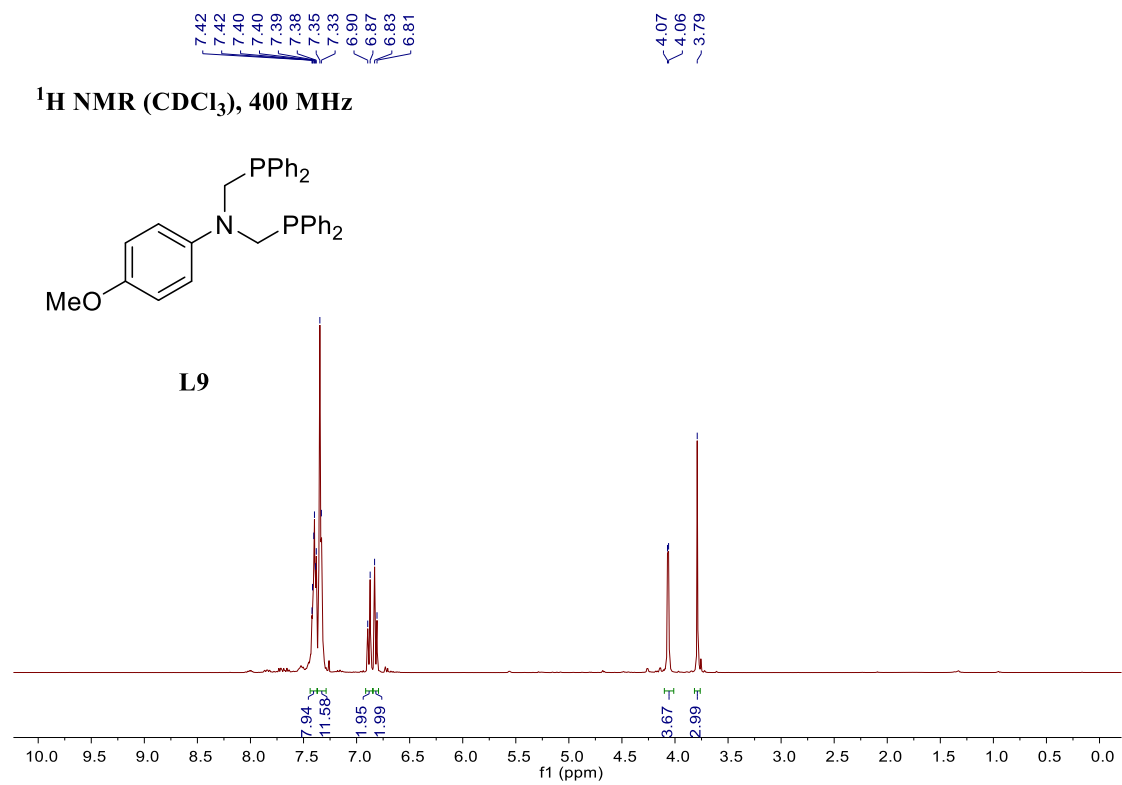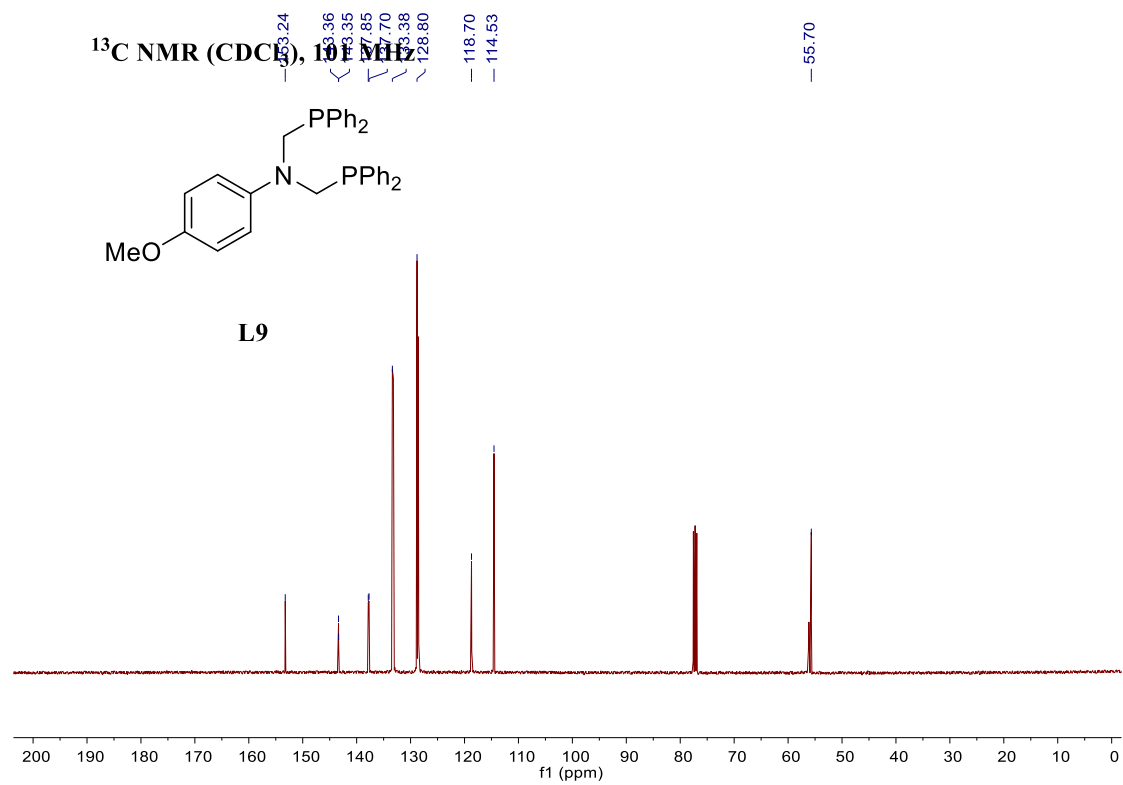

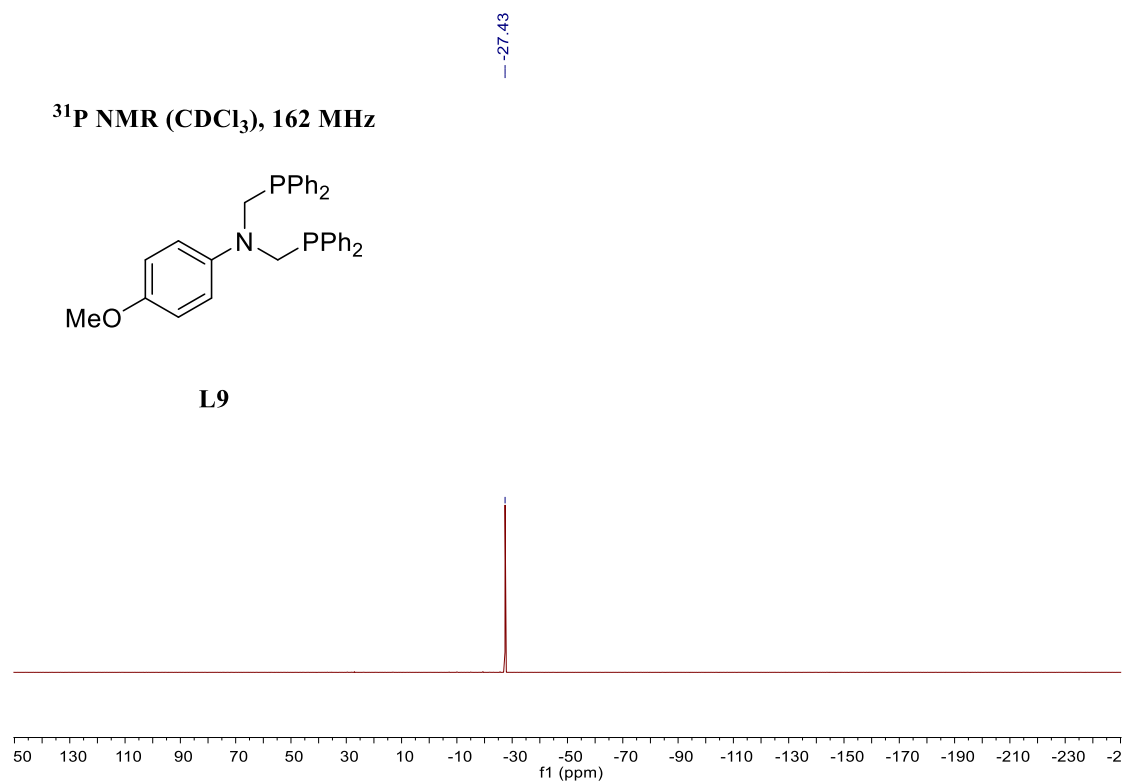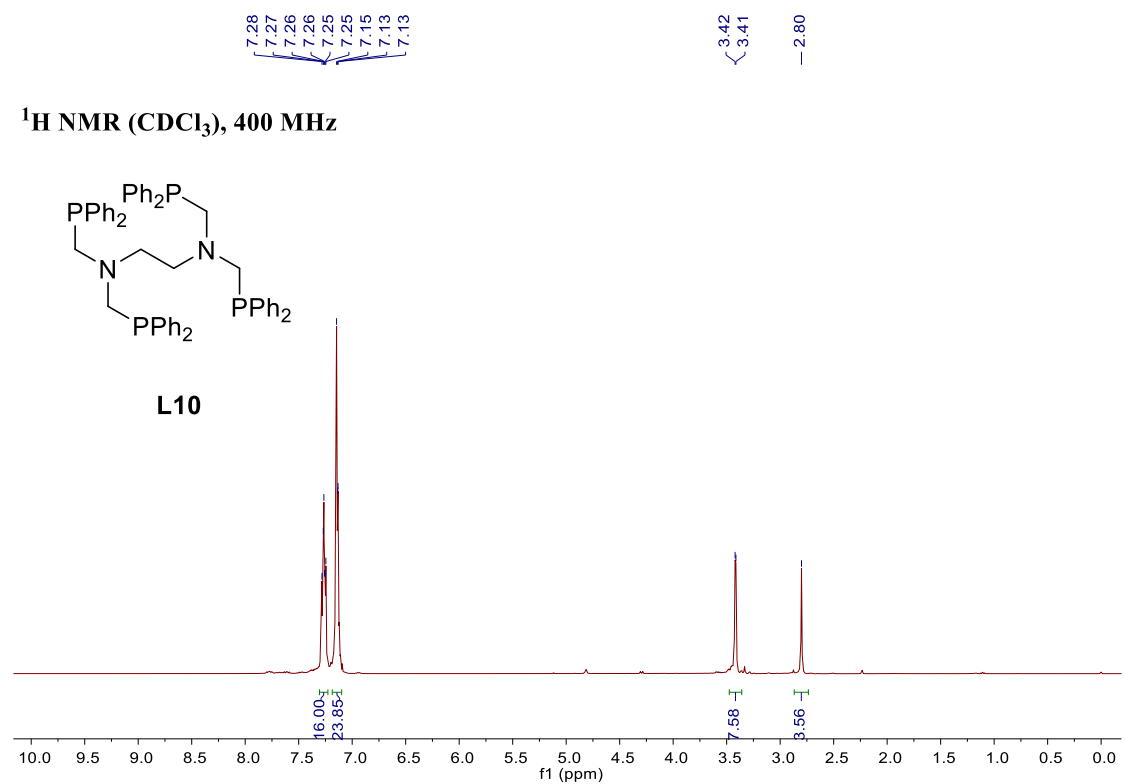

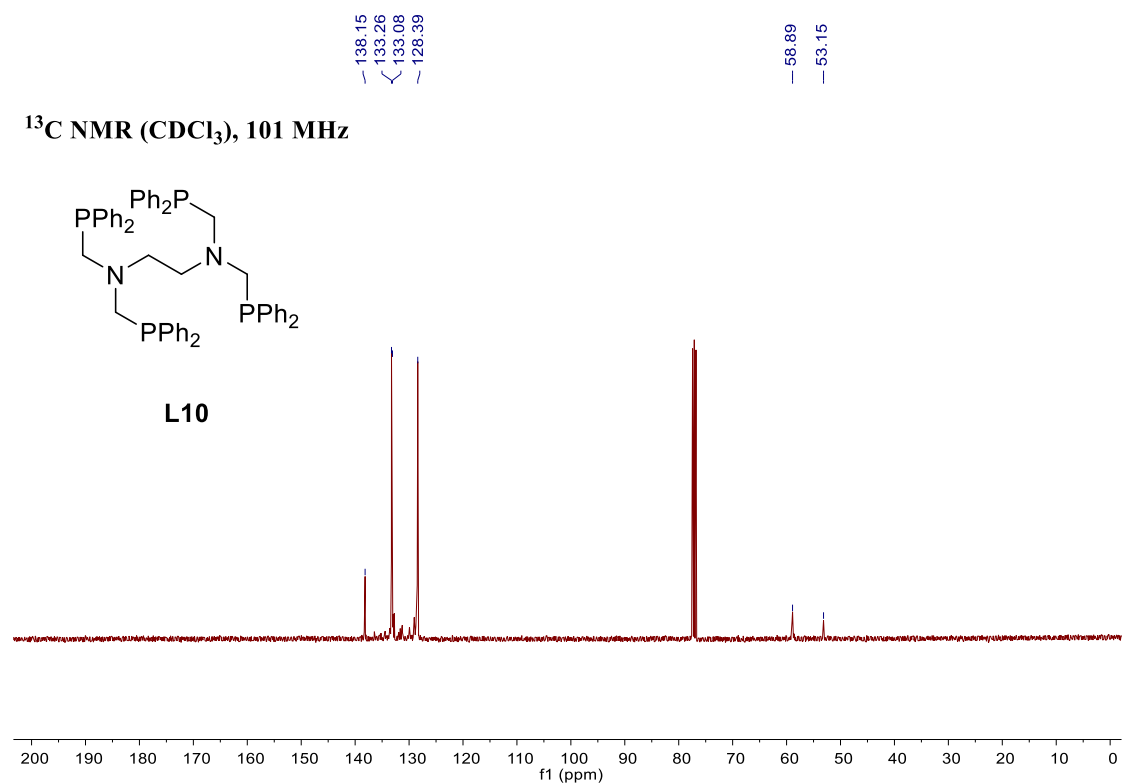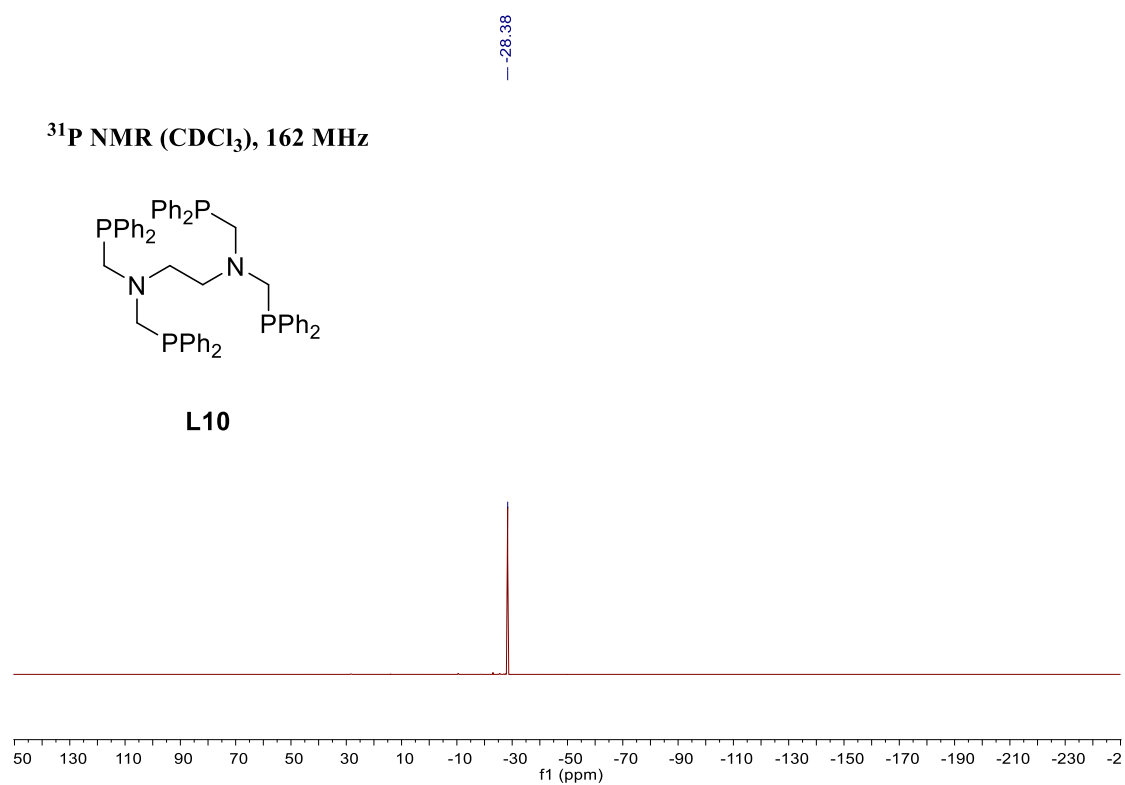

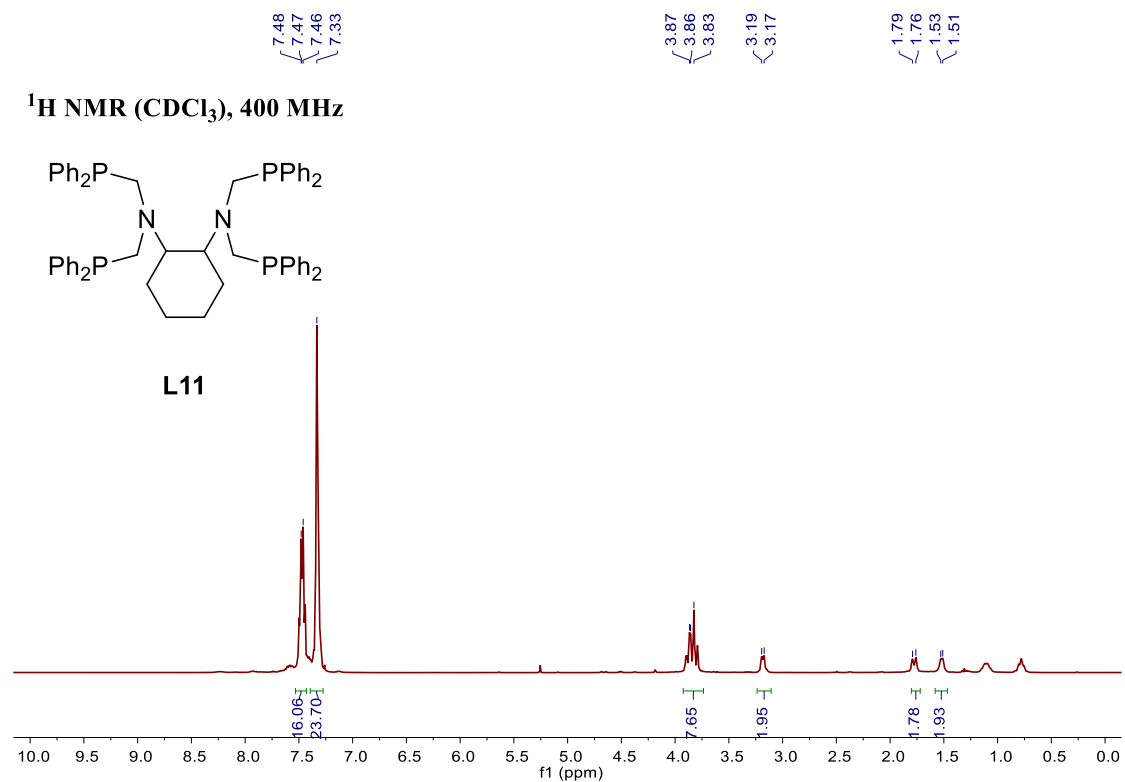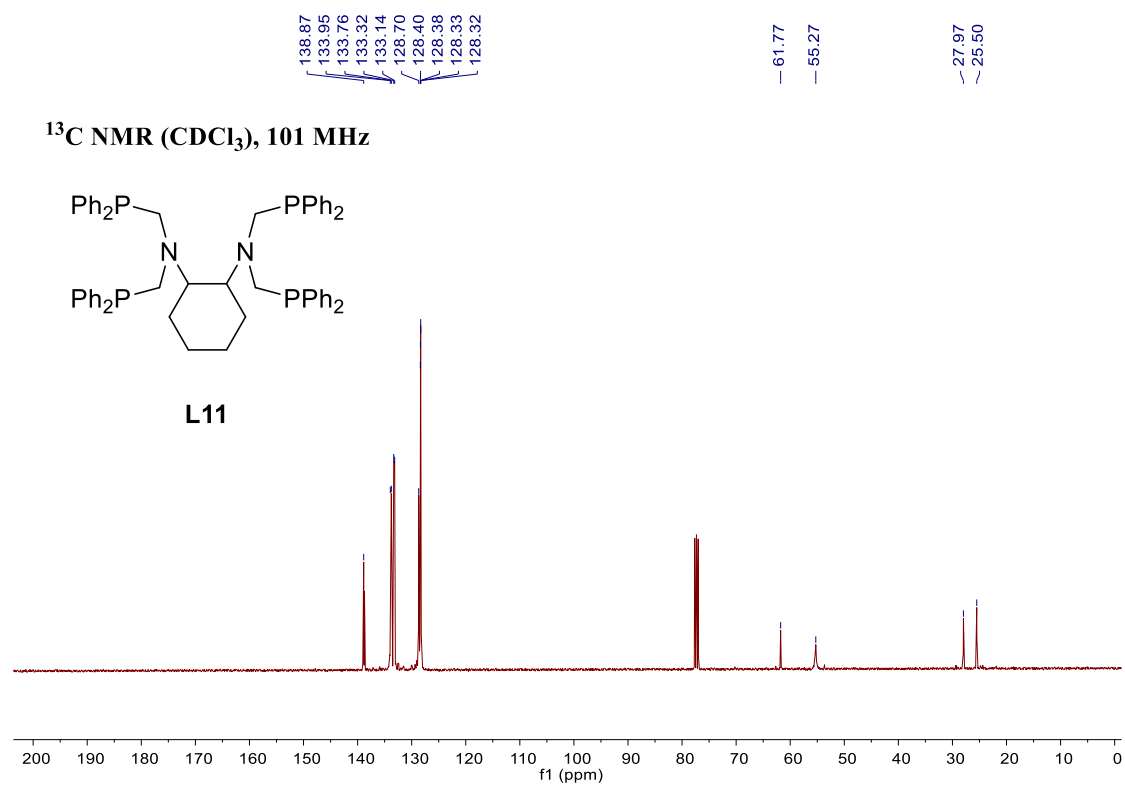

c1ccc(cc1)P(c2ccccc2)CN3C4C(C5C4C(C3)C5)C6C(C2)C(C1)C6

**$^{31}\text{P}$  NMR ( $\text{CDCl}_3$ ), 162 MHz**

**L11**

Chemical structure of L11: c1ccc(cc1)P(c2ccccc2)c3ccccc3N4CCCCC4N(c5ccccc5)P(c6ccccc6)c7ccccc7

Peak list (ppm):

| Peak Label | Chemical Shift (ppm) |
|------------|----------------------|
| 8.50       | 8.50                 |
| 7.46       | 7.46                 |
| 7.44       | 7.44                 |
| 7.42       | 7.42                 |
| 7.21       | 7.21                 |
| 7.20       | 7.20                 |
| 7.19       | 7.19                 |
| -24.84     | -24.84               |
| -3.34      | -3.34                |

CN(C)Cc1ccccc1

**2a**

CNc1ccccc1

0.99  
2.24  
1.28  
2.07  
3.12

f1 (ppm)



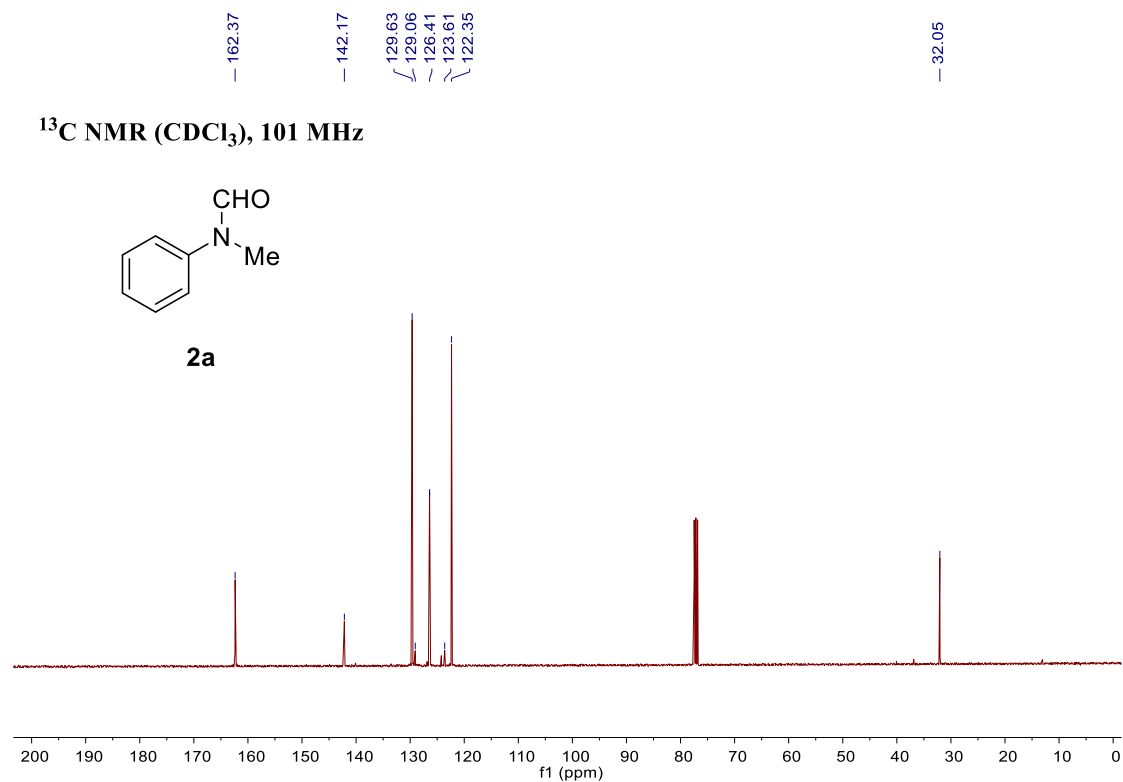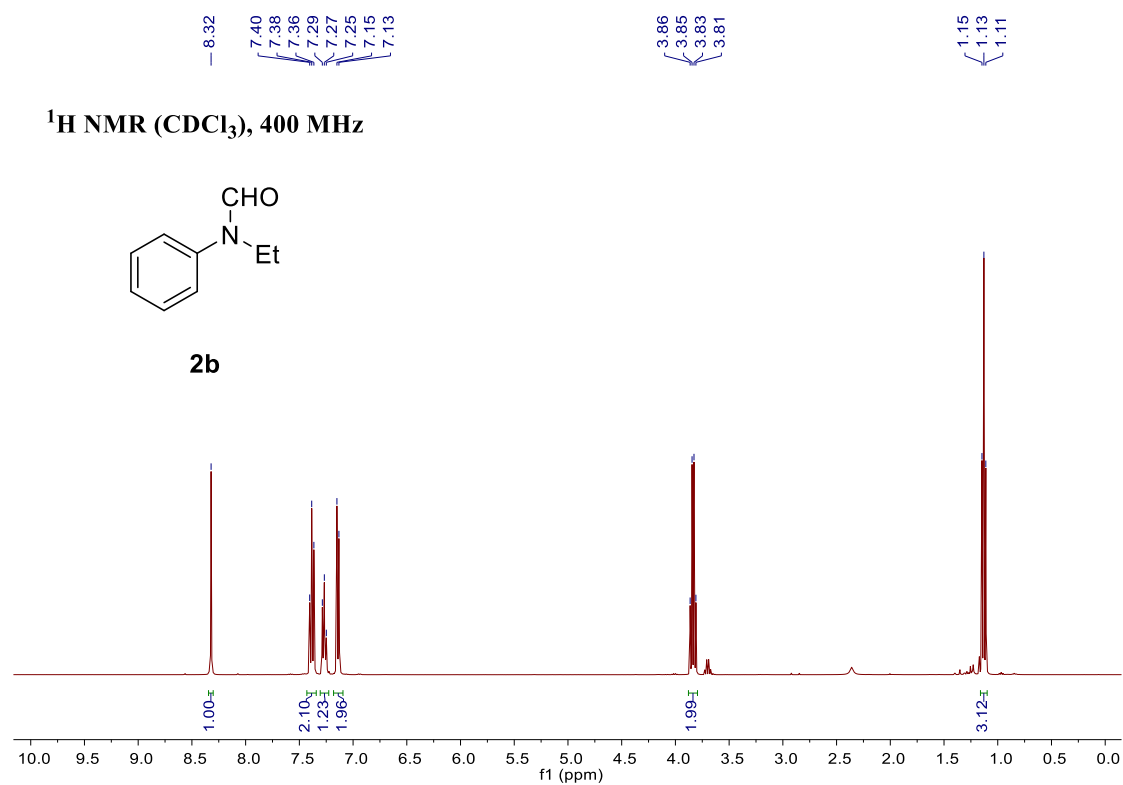

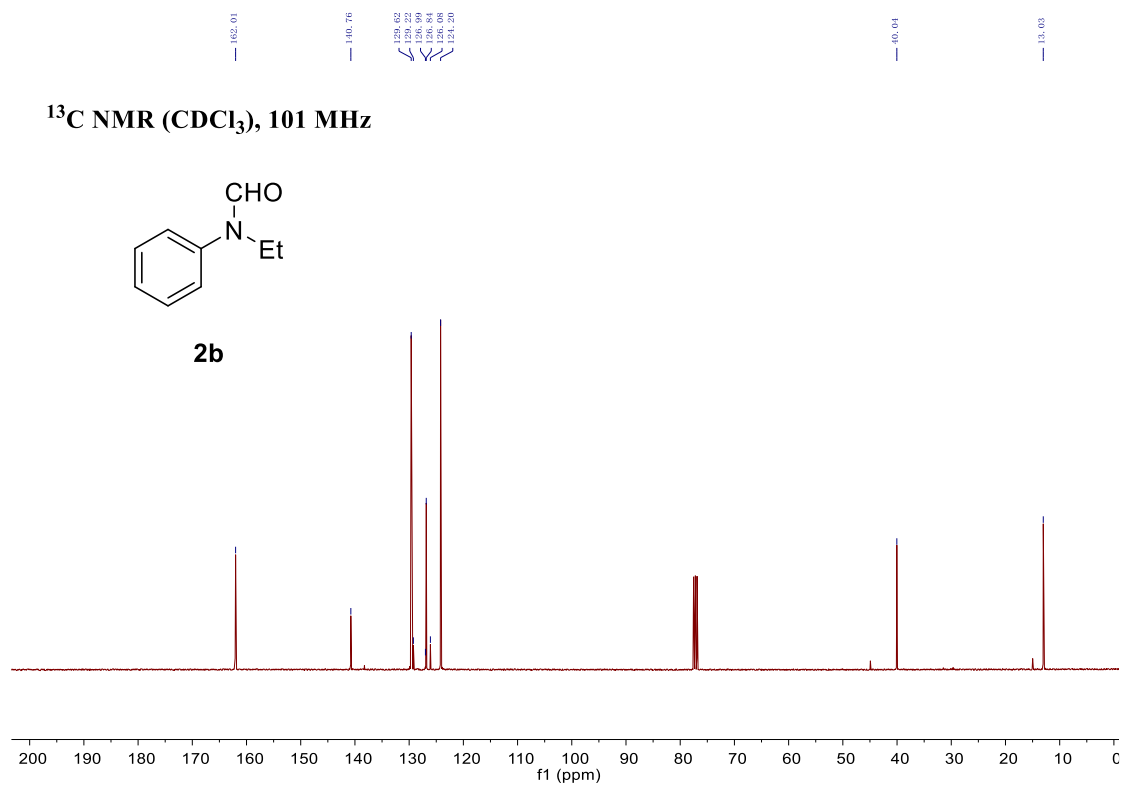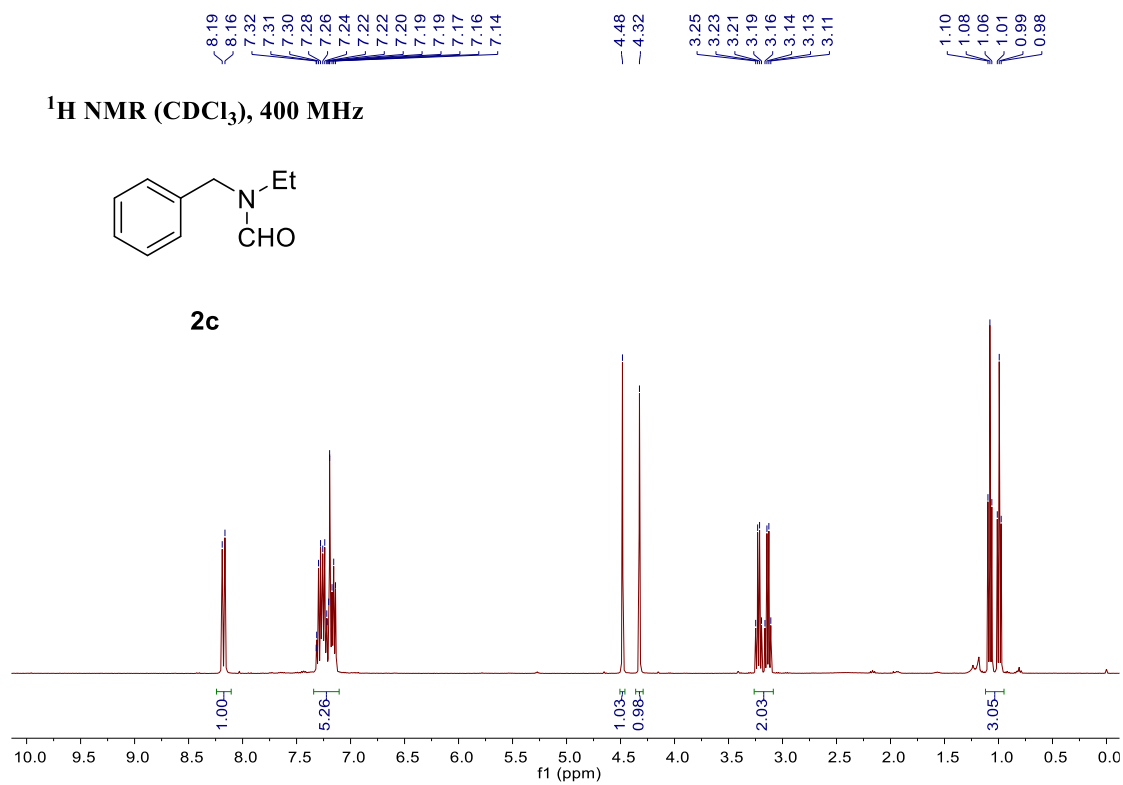

$^{13}\text{C}$  NMR ( $\text{CDCl}_3$ ), 101 MHz

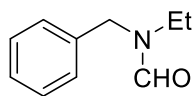

**2c**

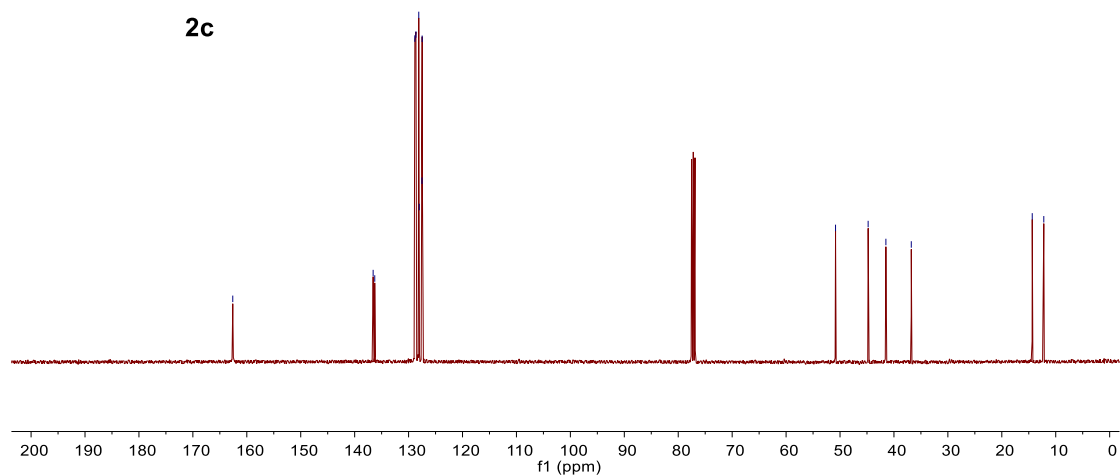

$^1\text{H}$  NMR ( $\text{CDCl}_3$ ), 400 MHz

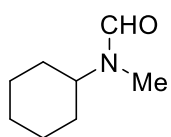

**2d**

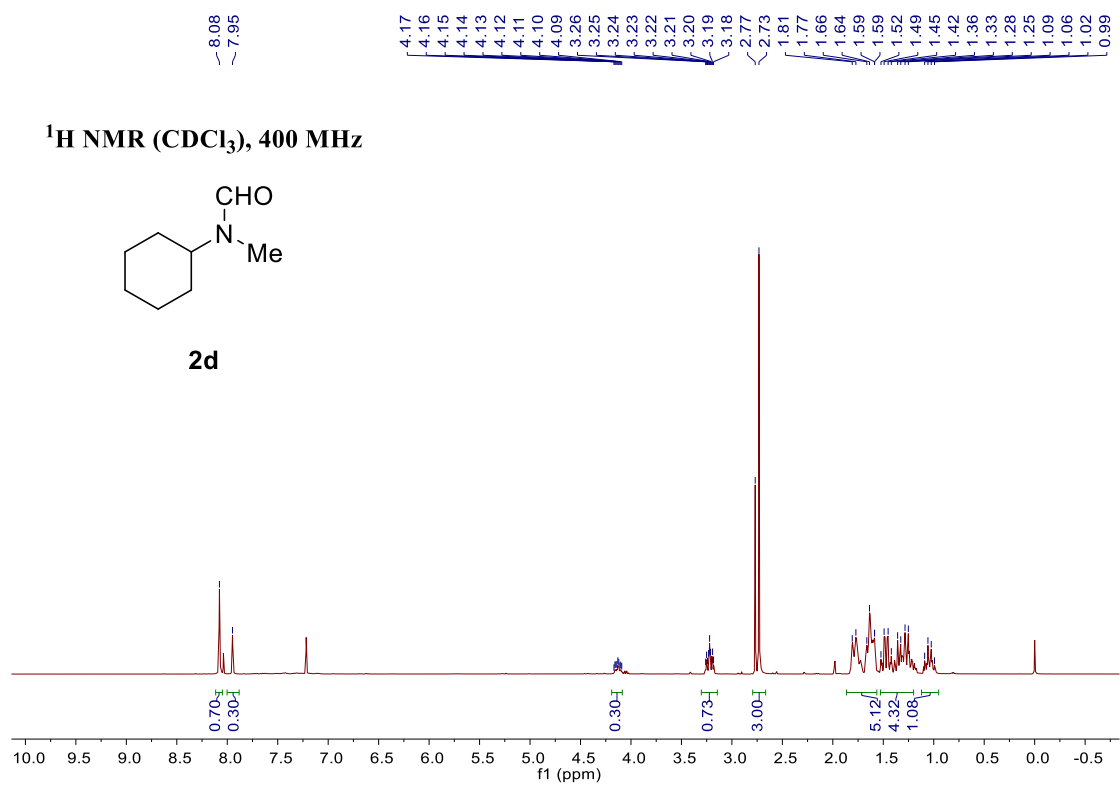

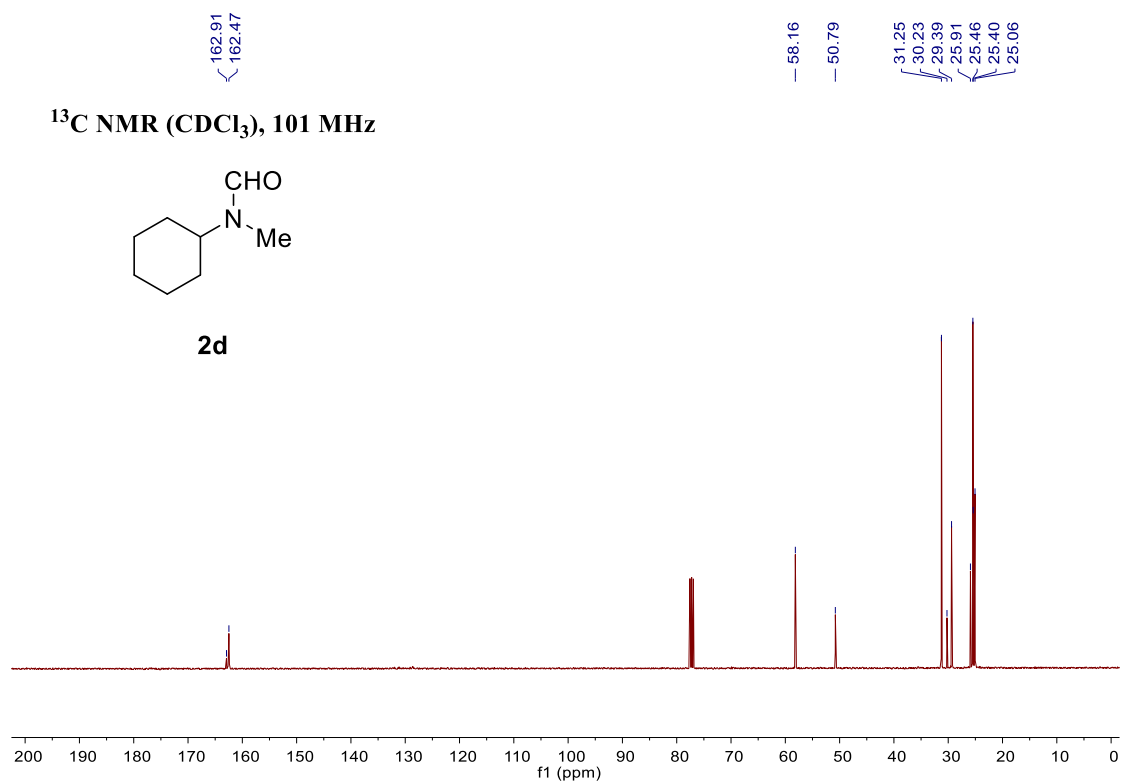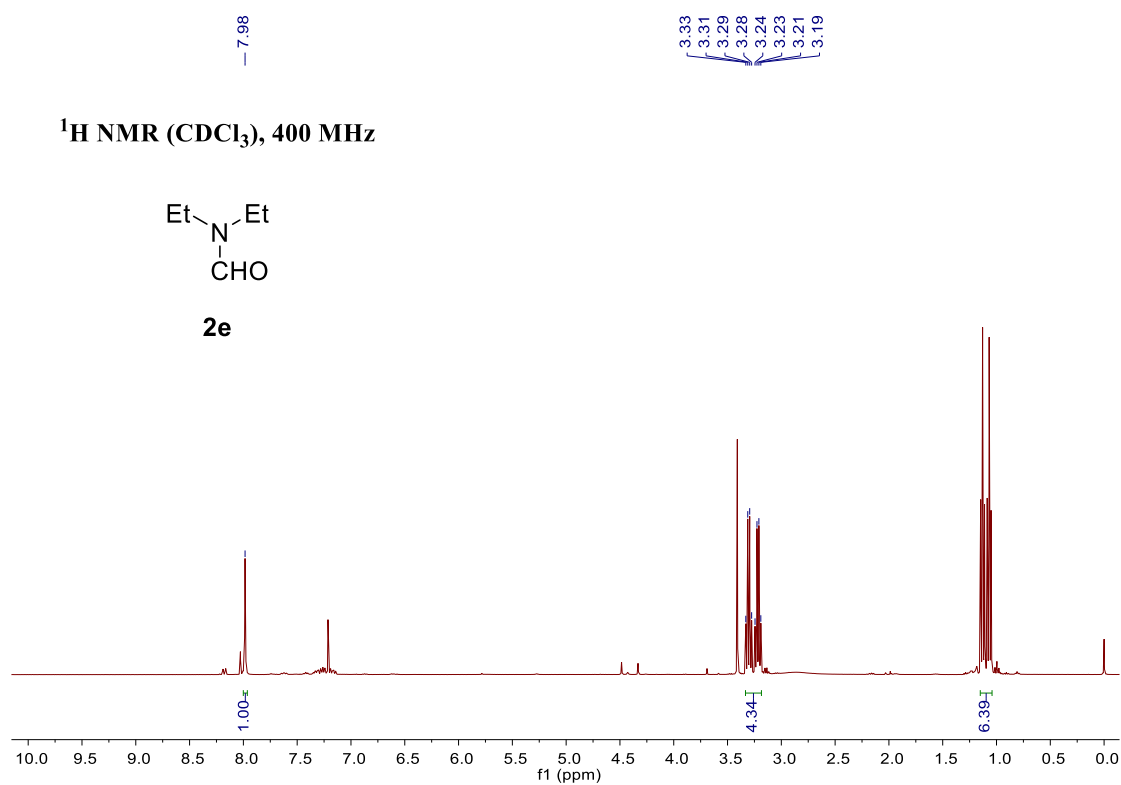

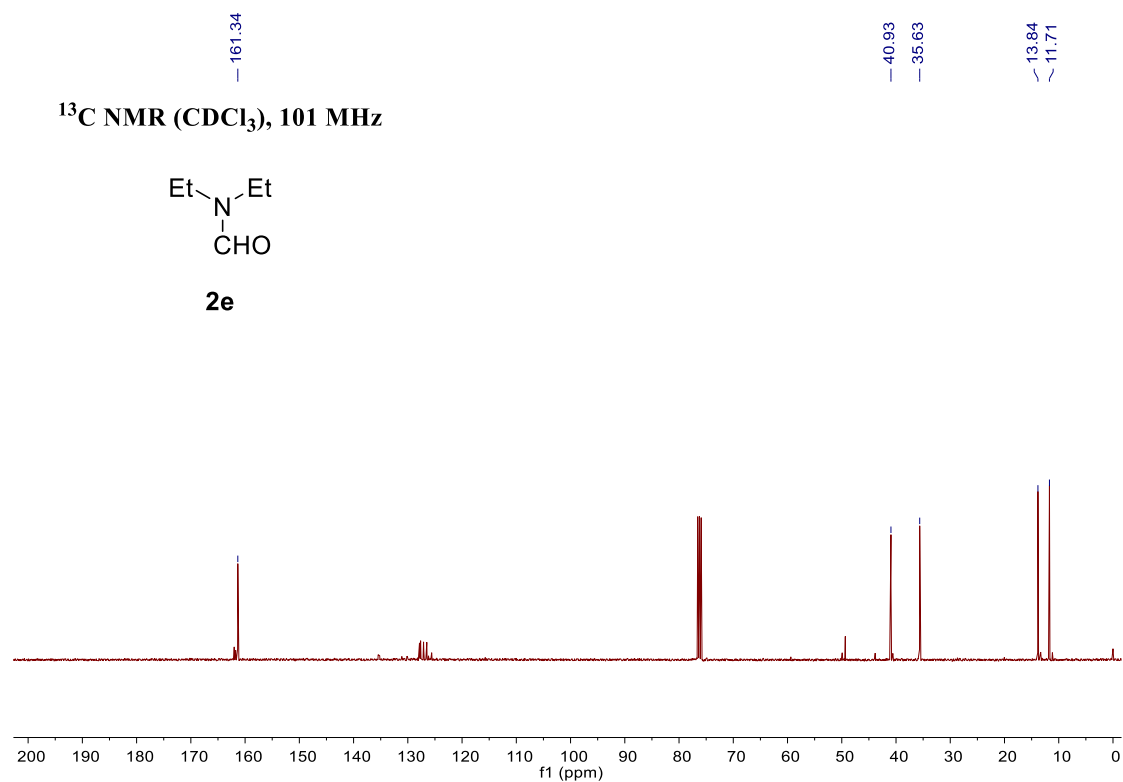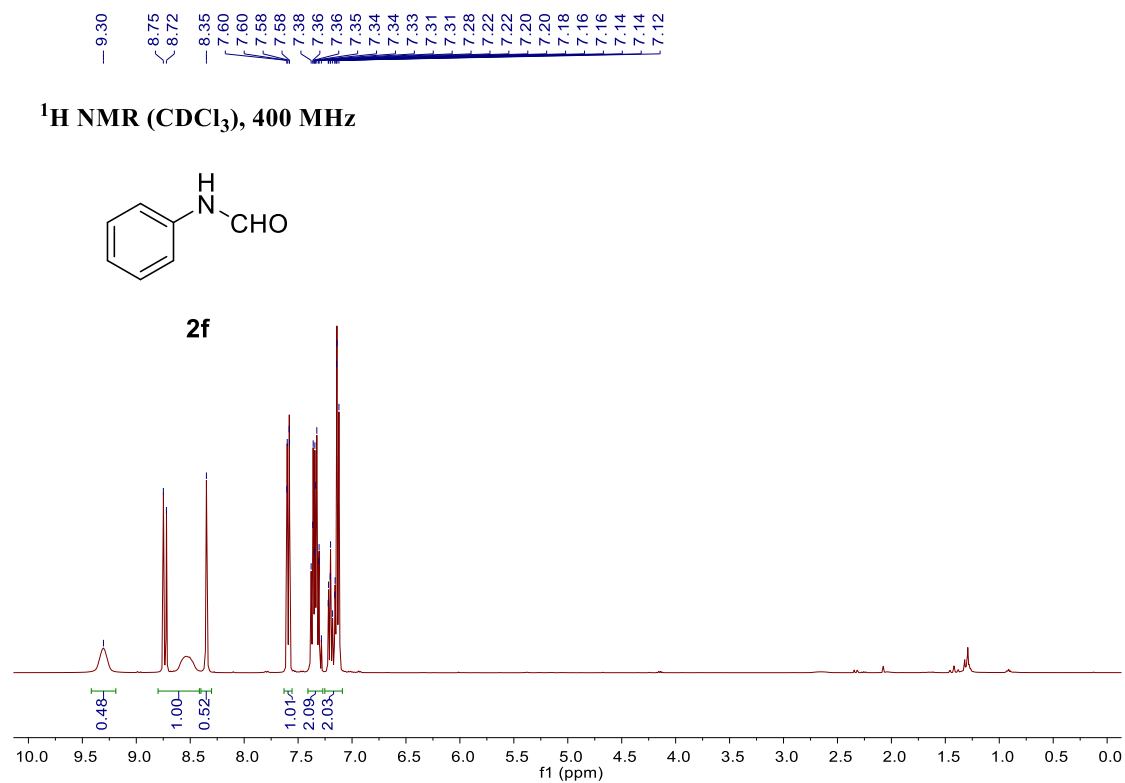

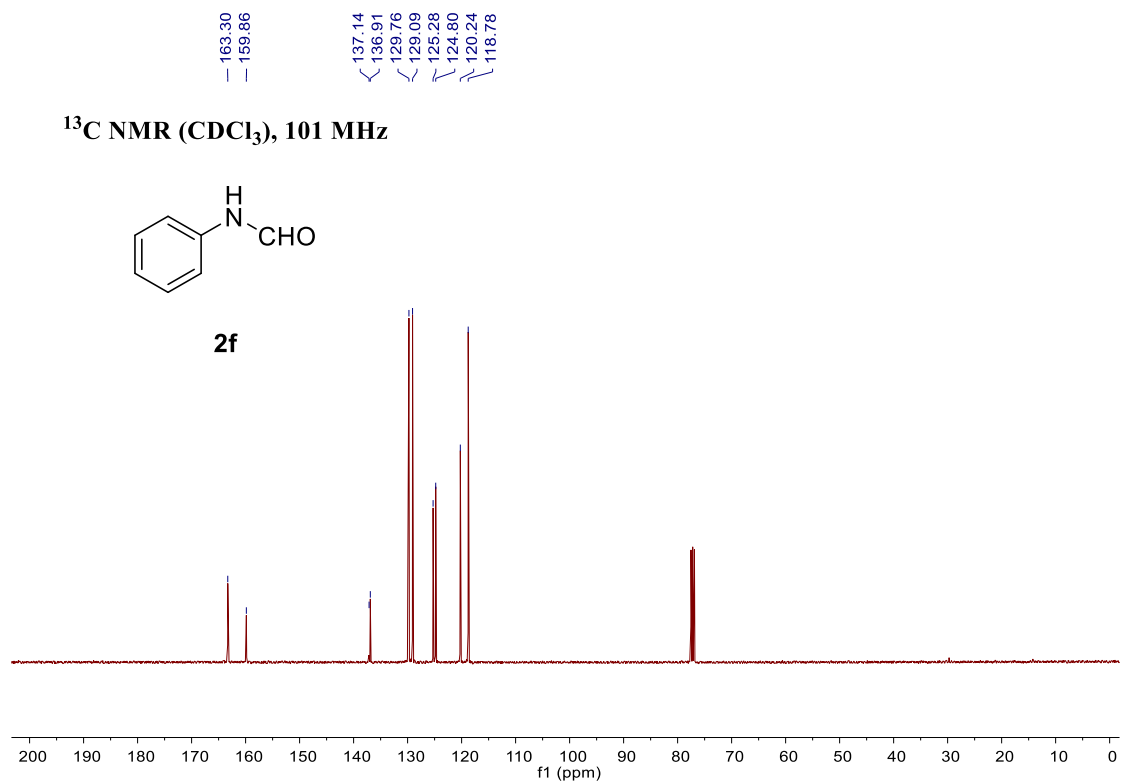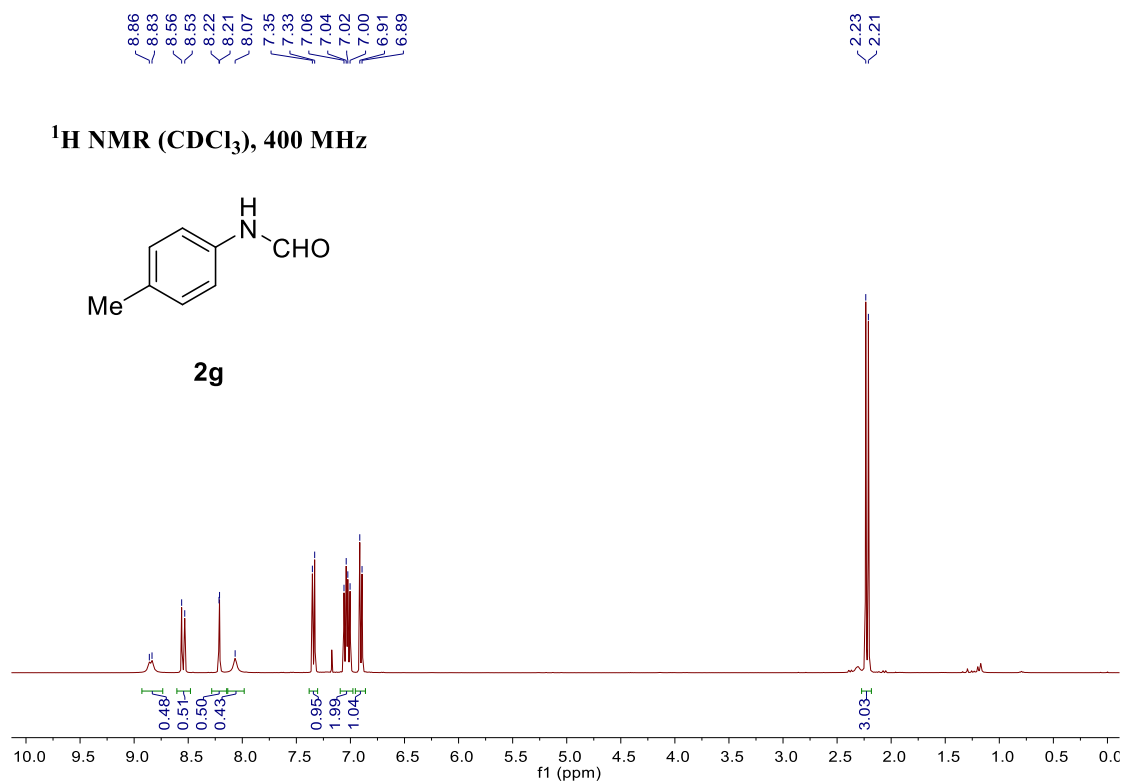

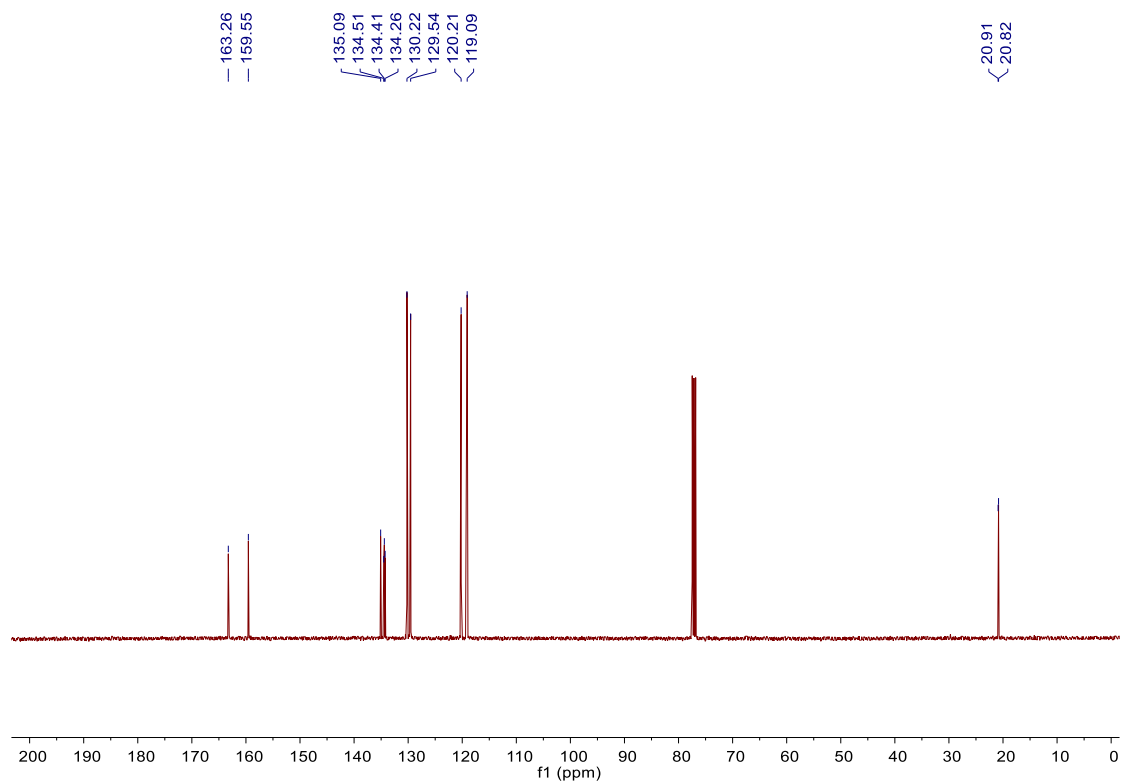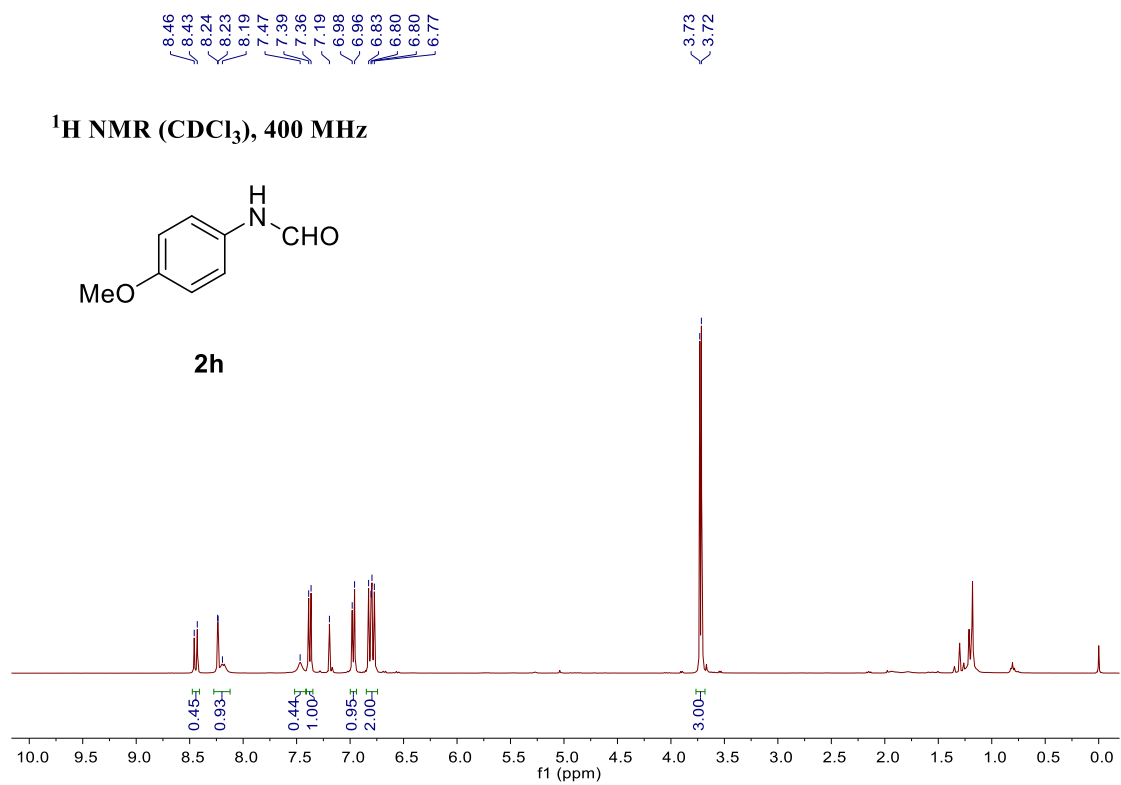

<sup>1</sup>H NMR (CDCl<sub>3</sub>), 400 MHz

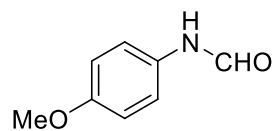

**2h**

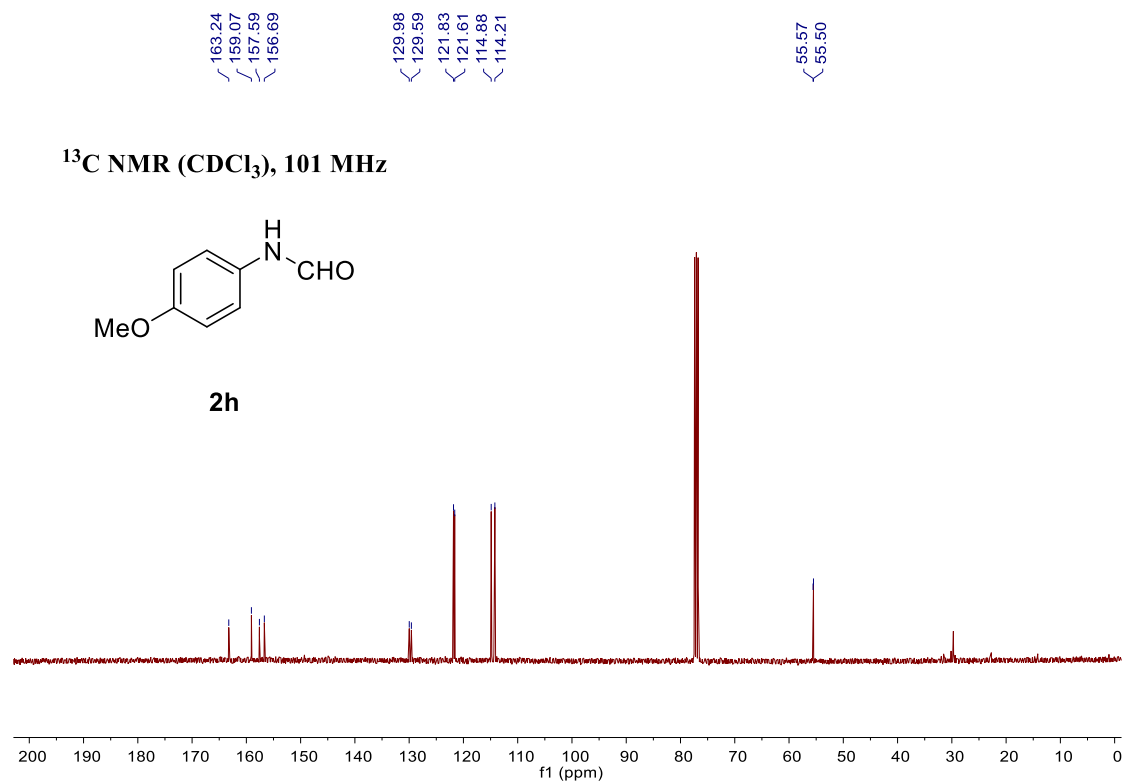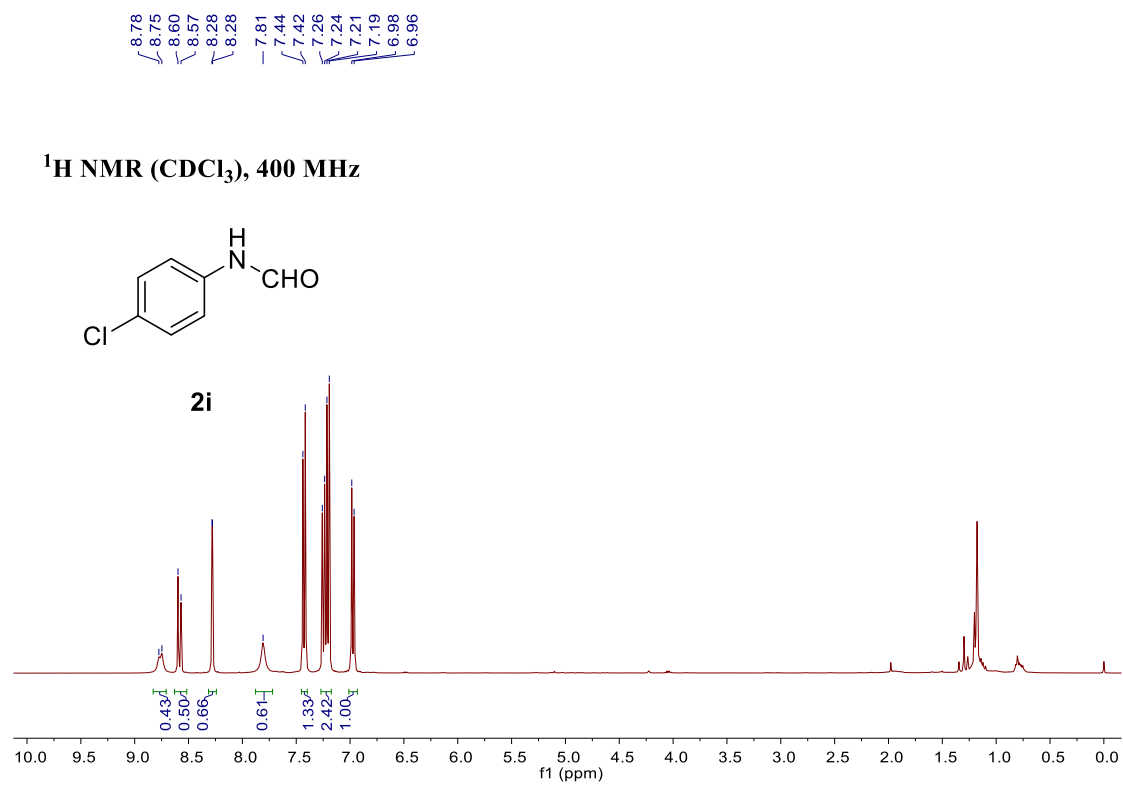



**$^{13}\text{C}$  NMR ( $\text{CDCl}_3$ ), 101 MHz**

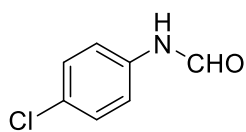

**2i**

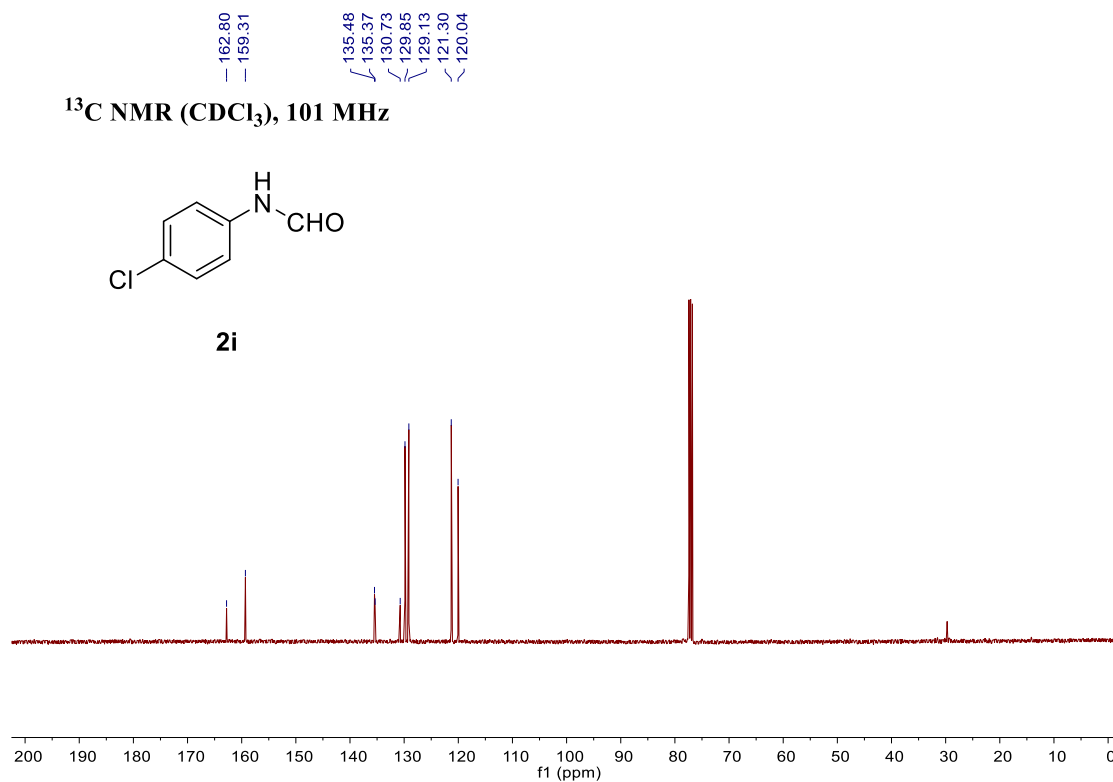

**$^1\text{H}$  NMR ( $\text{CDCl}_3$ ), 400 MHz**

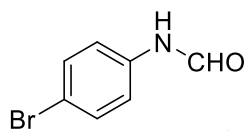

**2j**

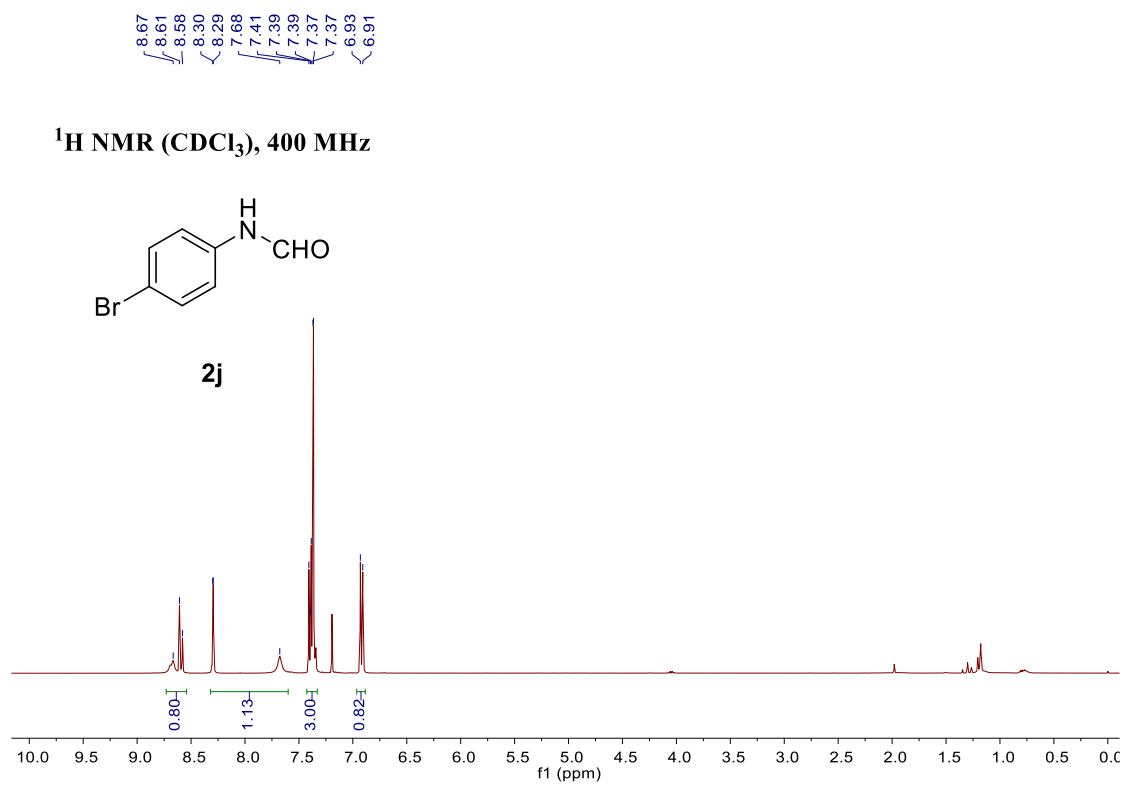

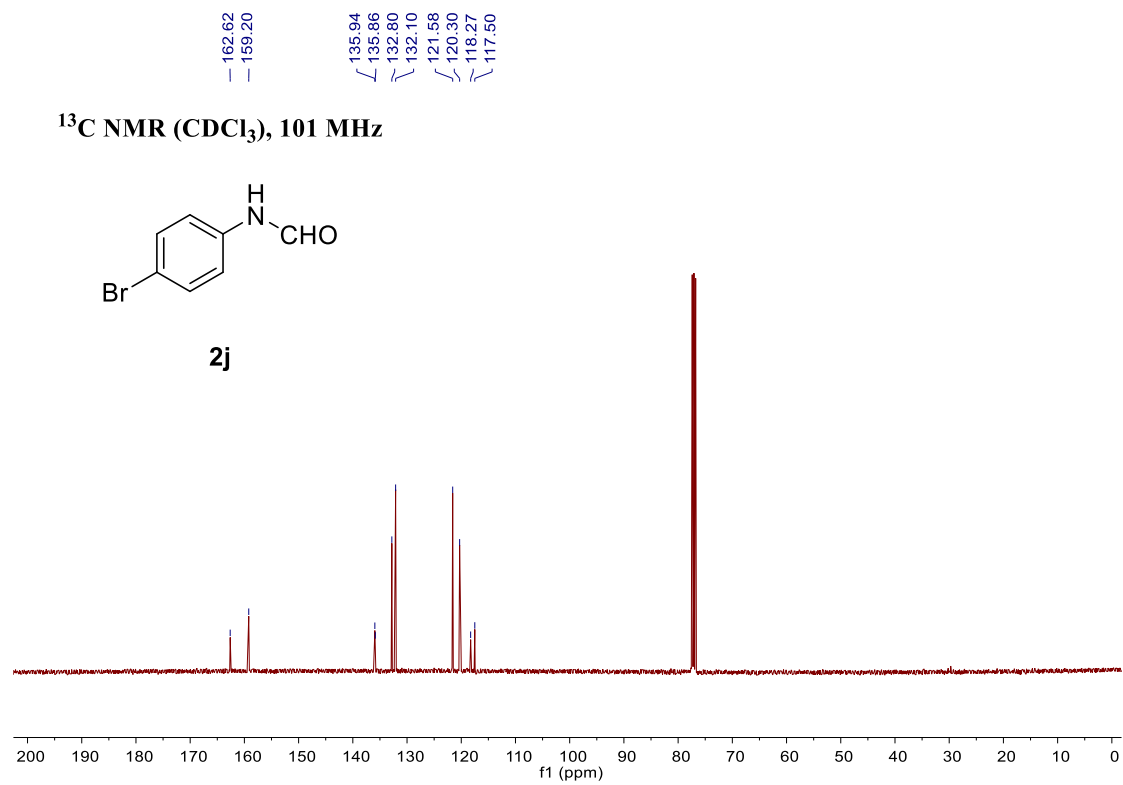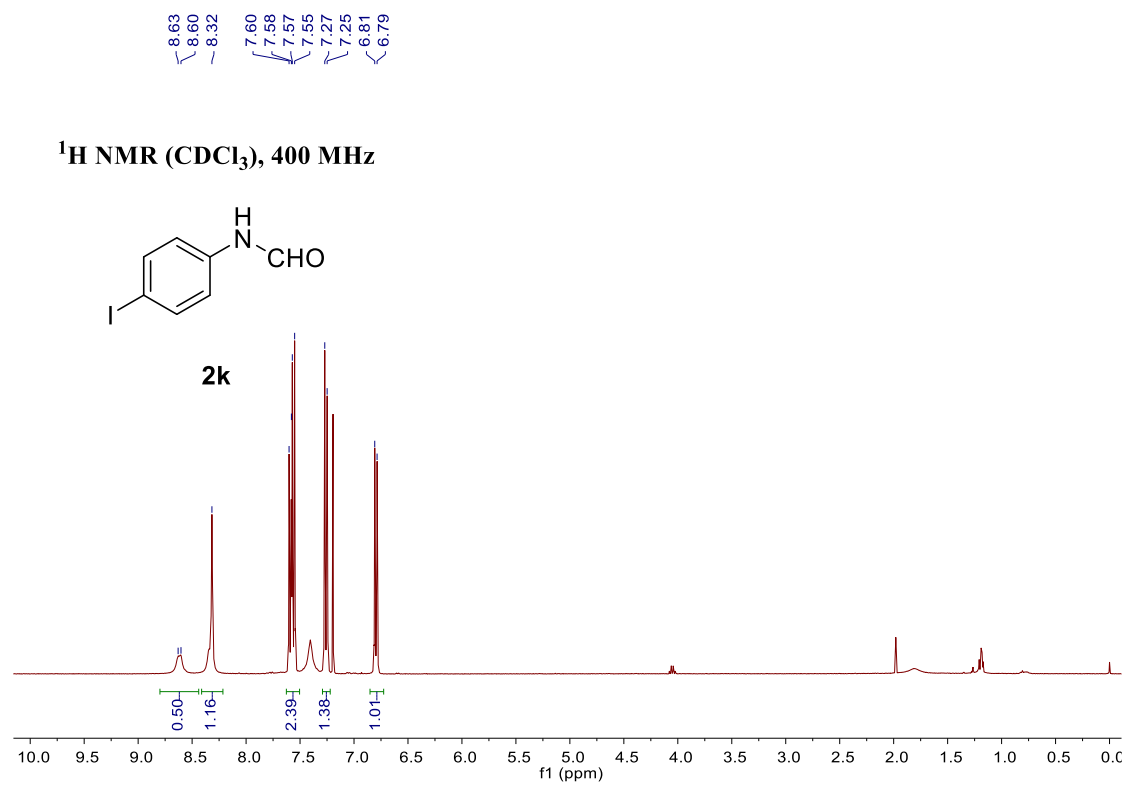

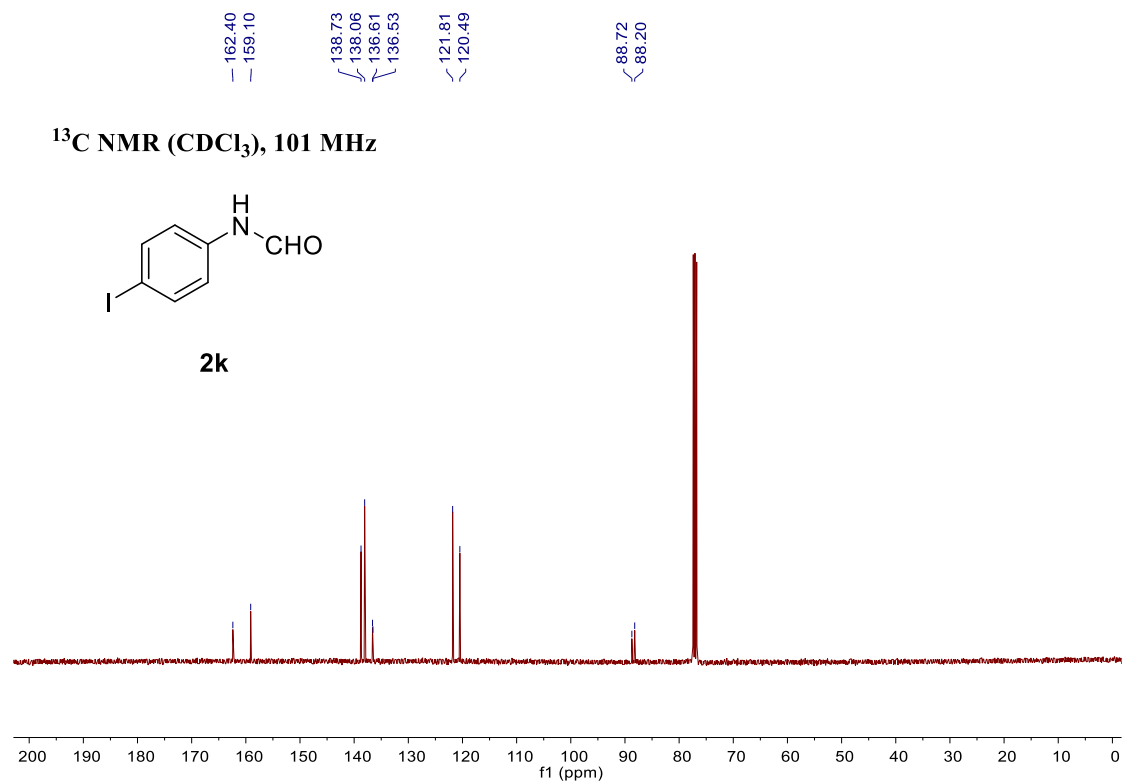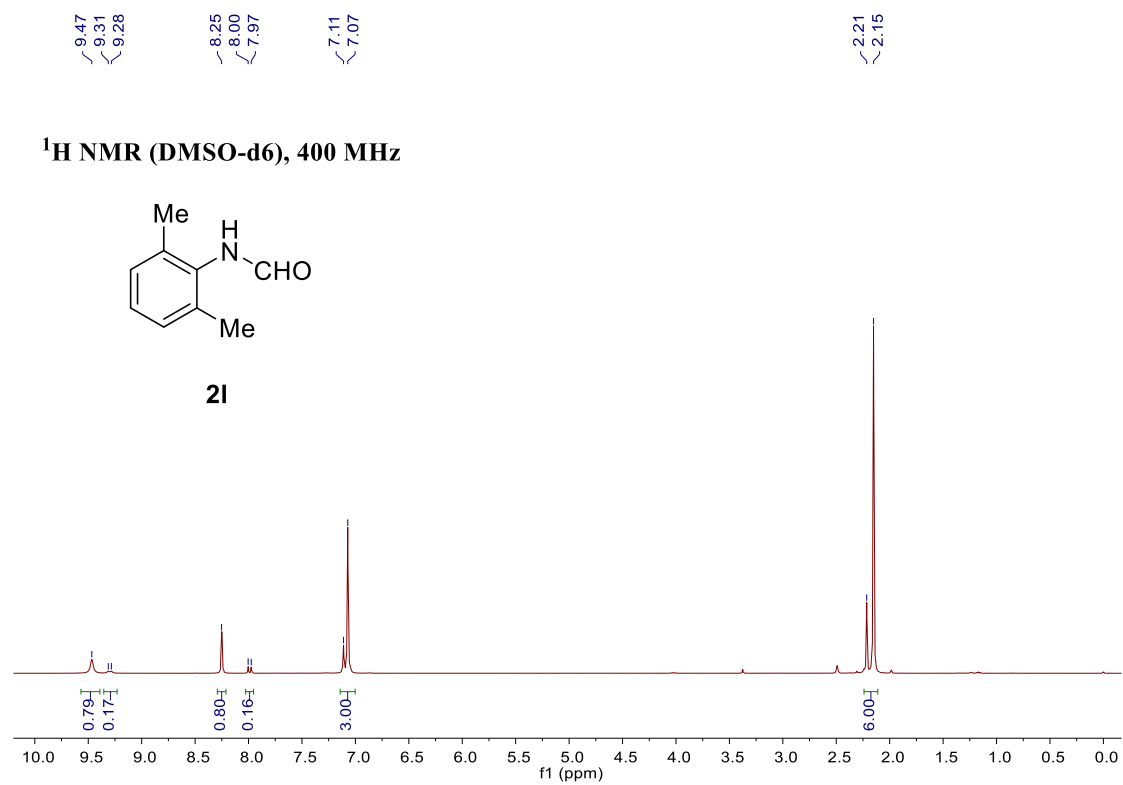

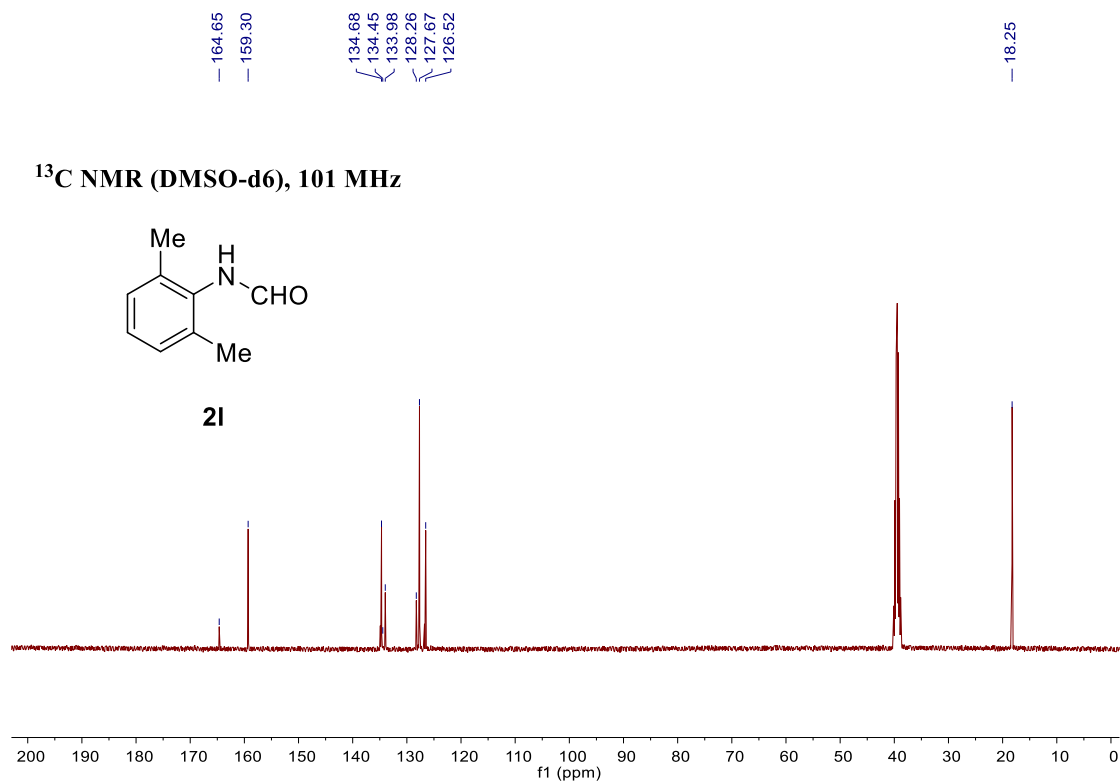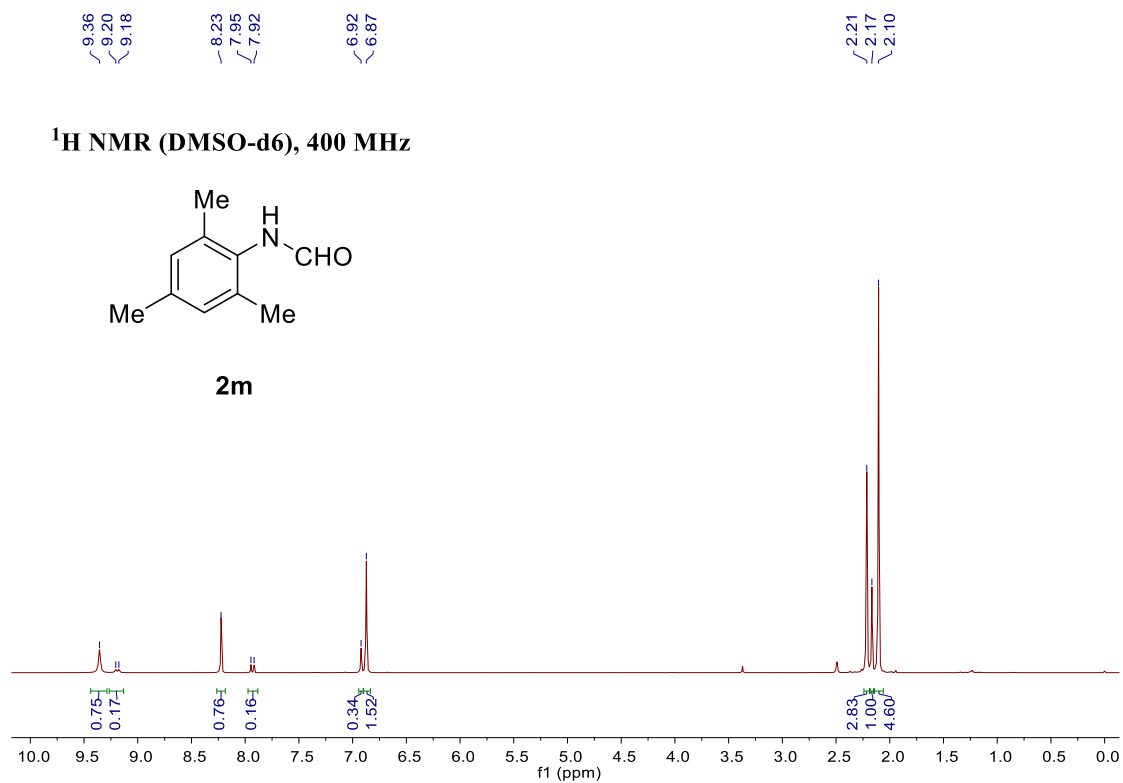

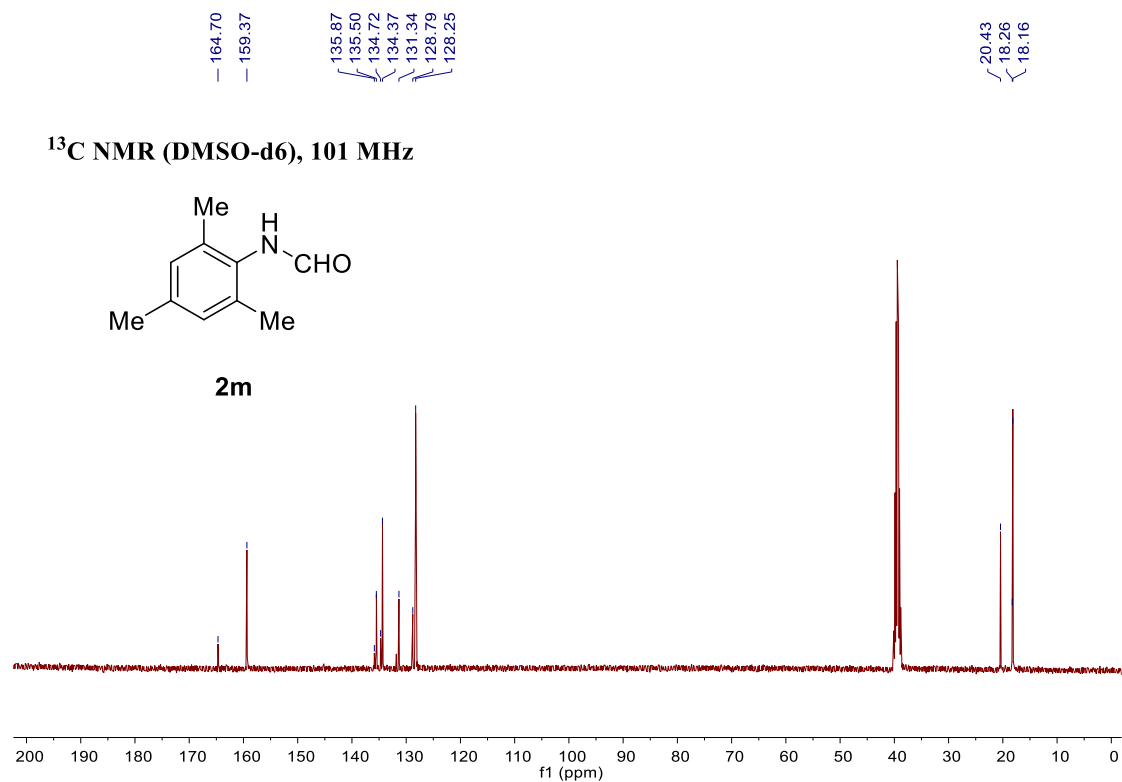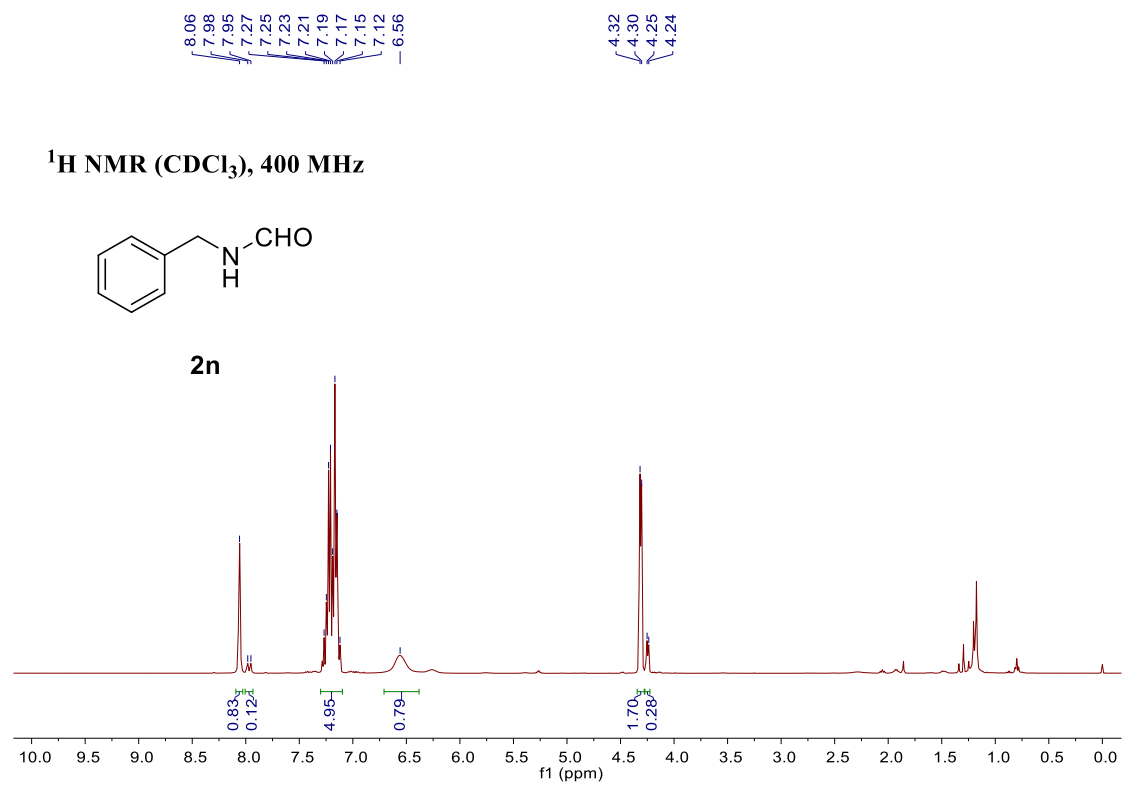

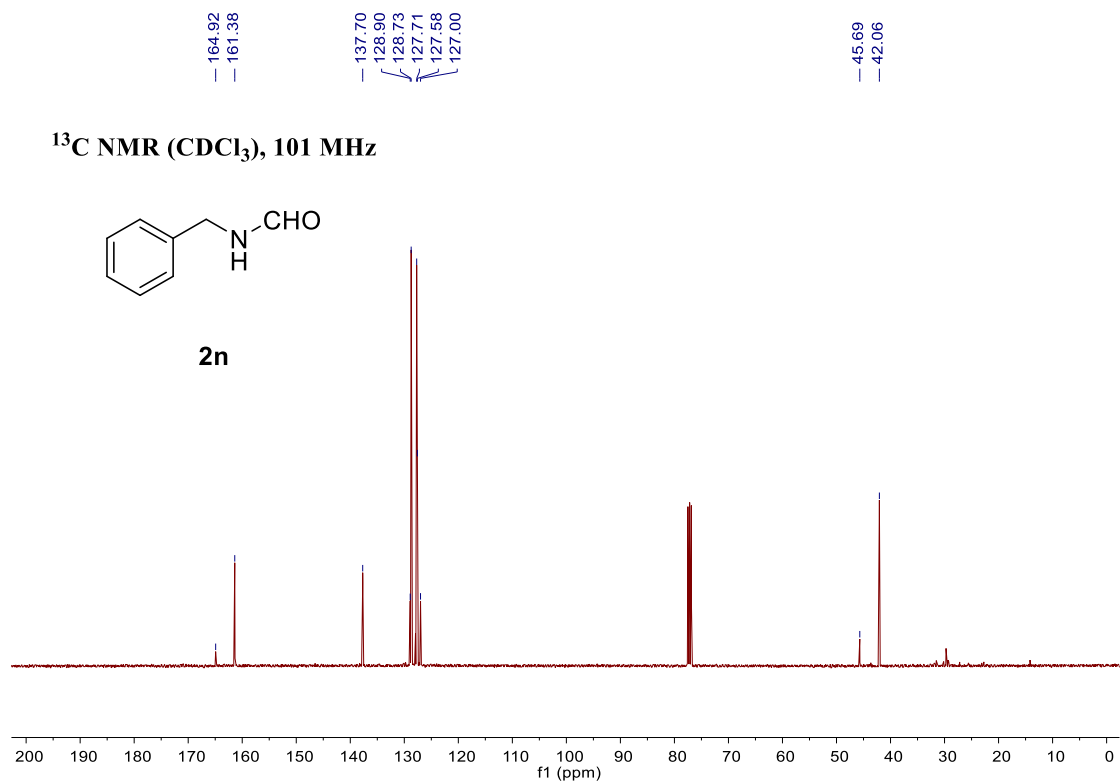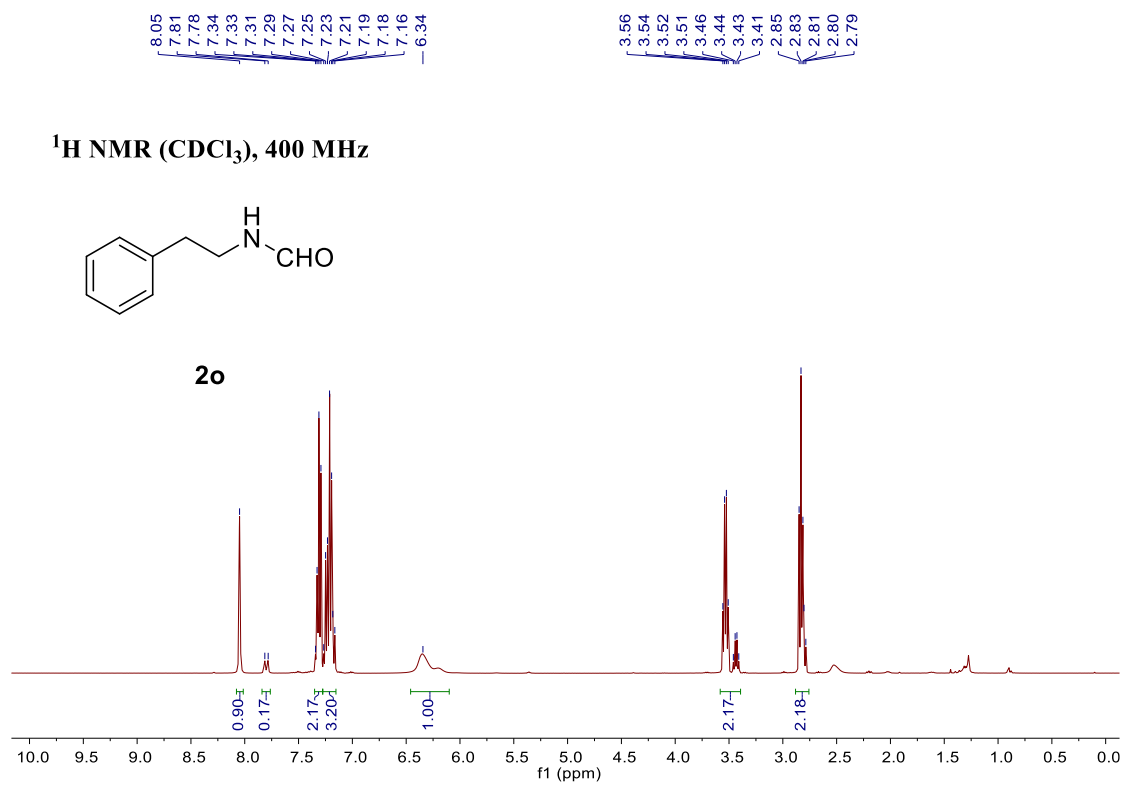

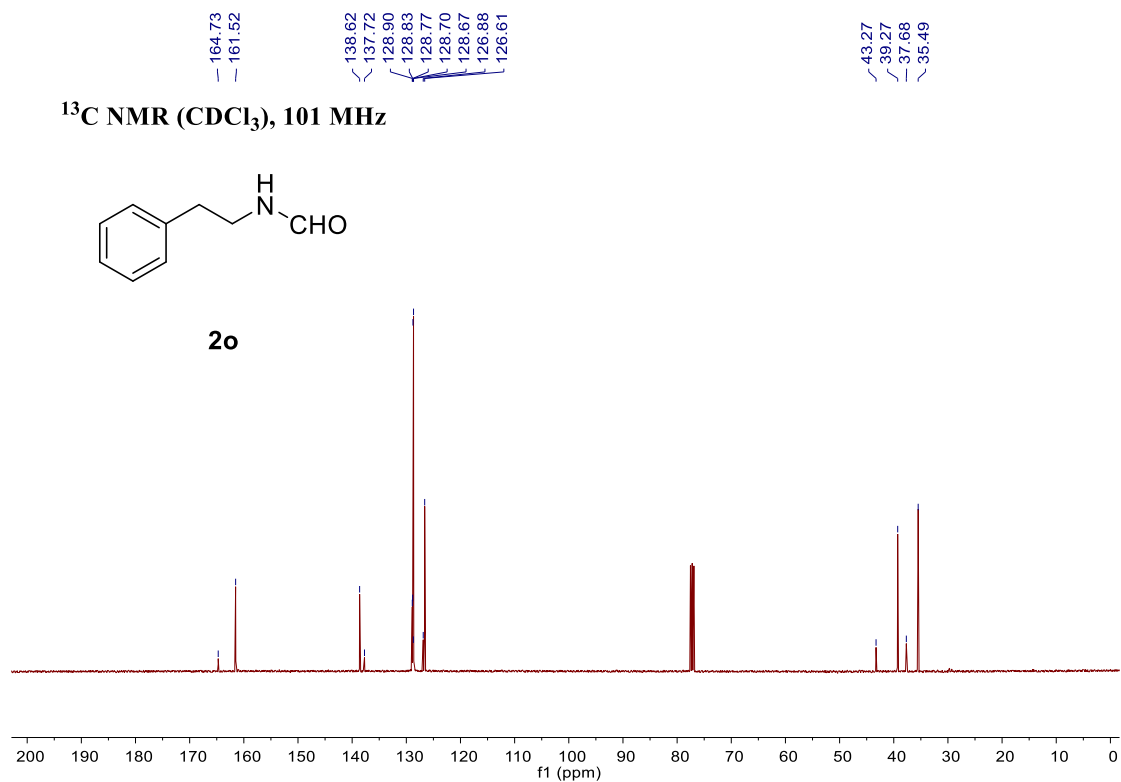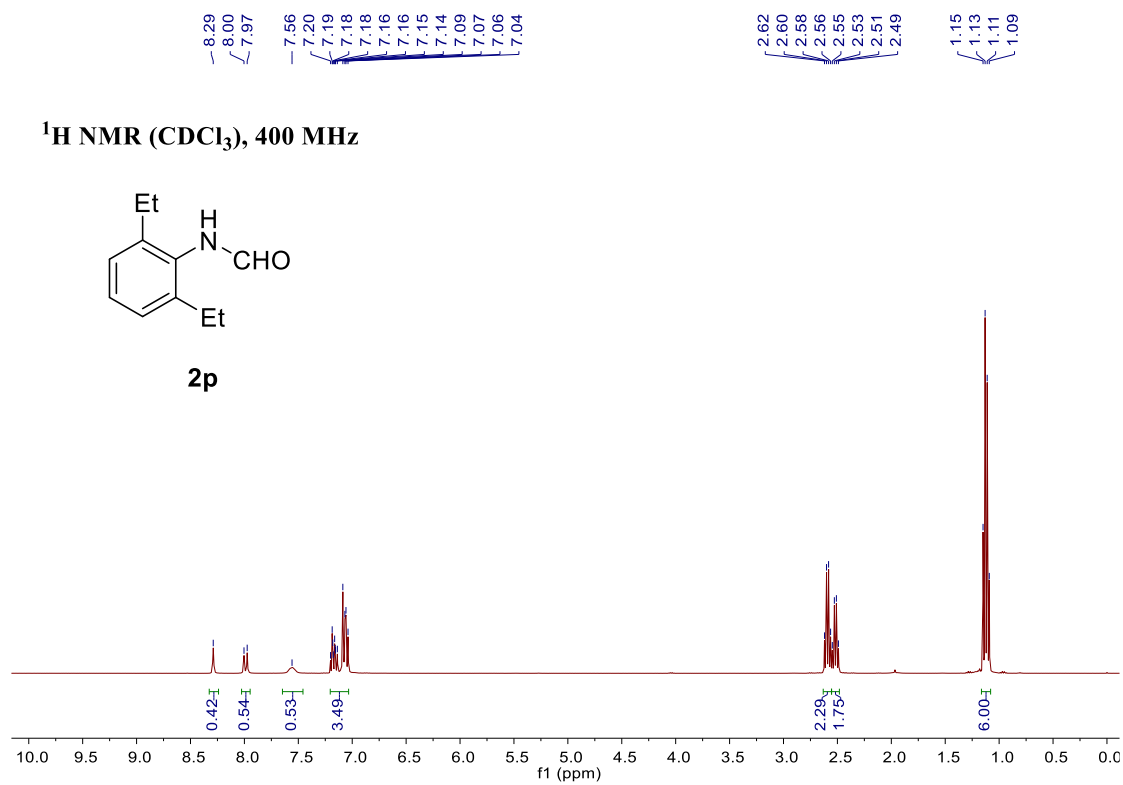

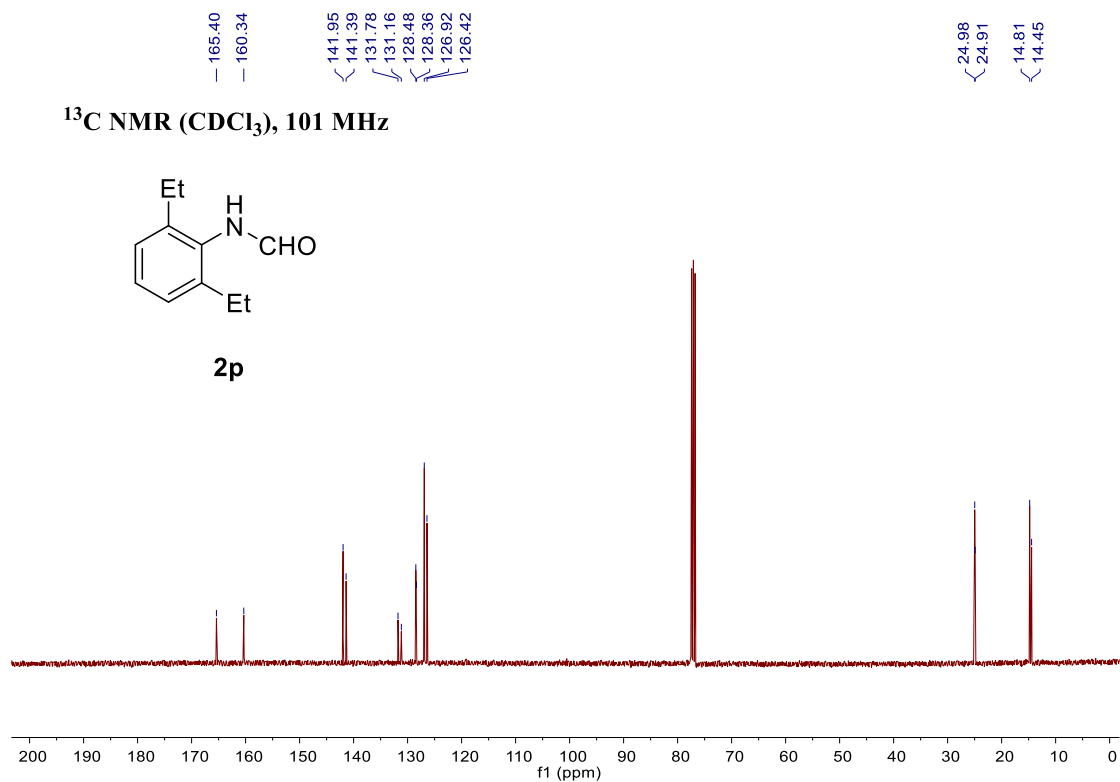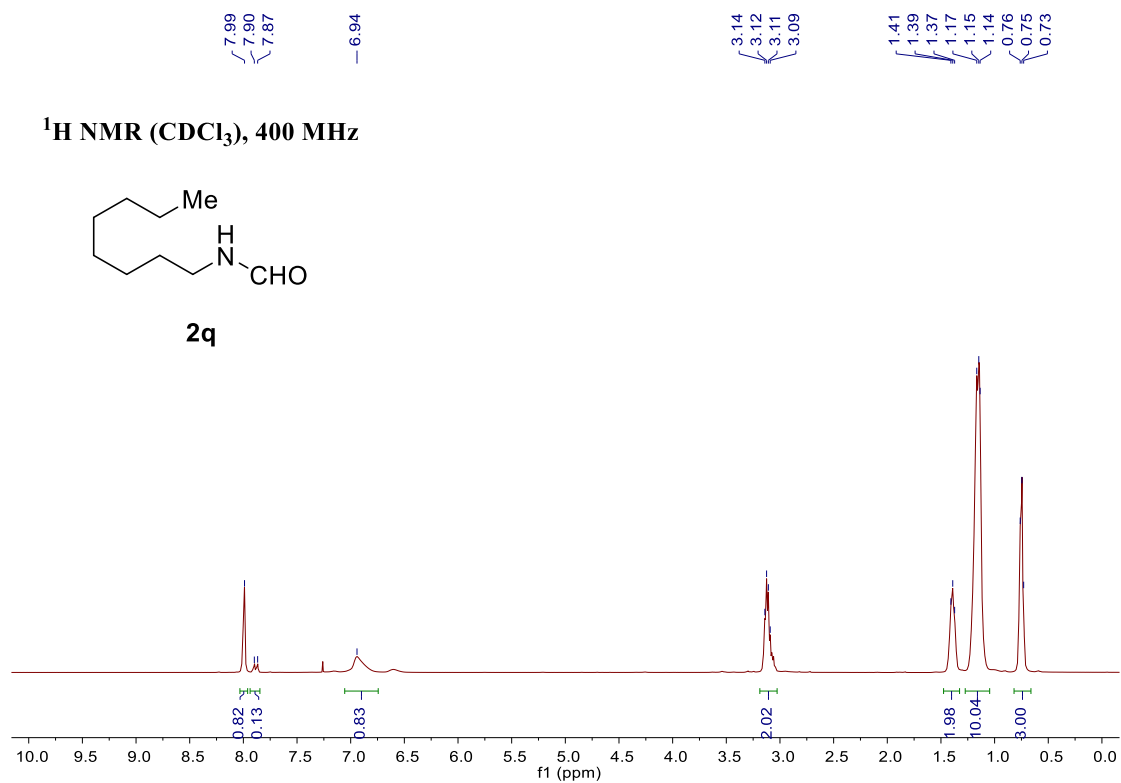



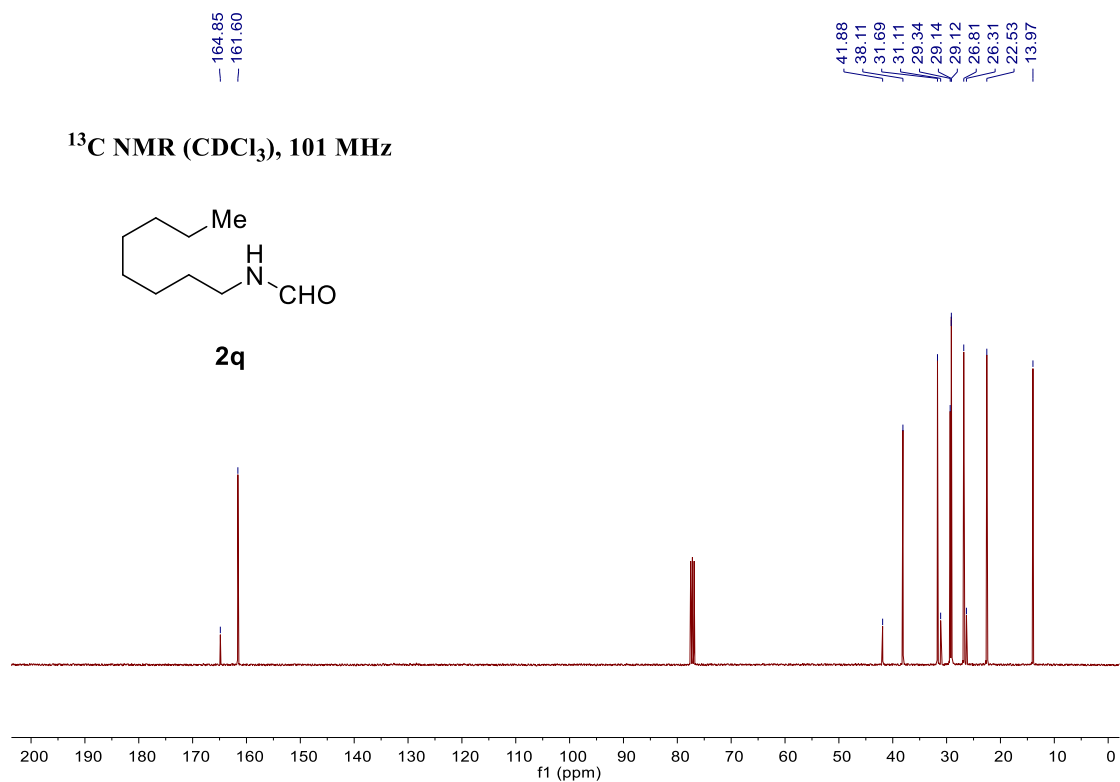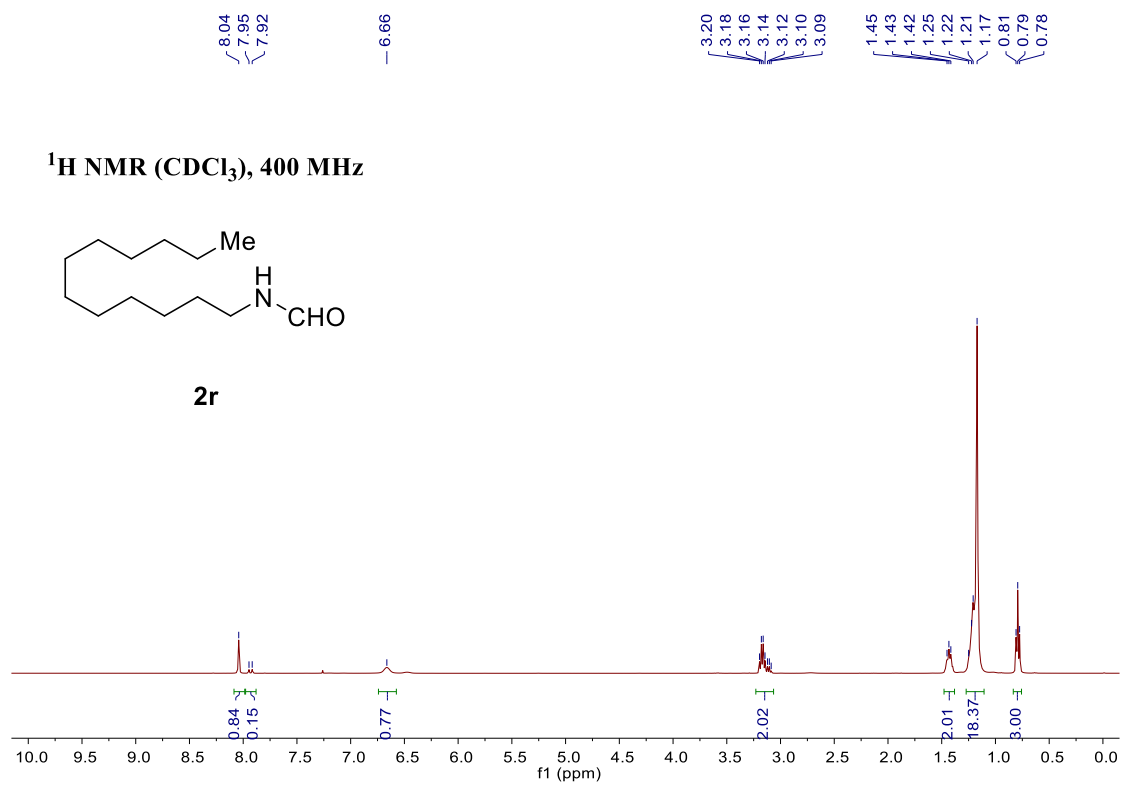

<sup>13</sup>C NMR (CDCl<sub>3</sub>), 101 MHz

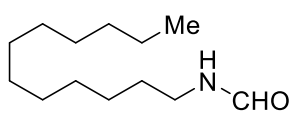

**2r**

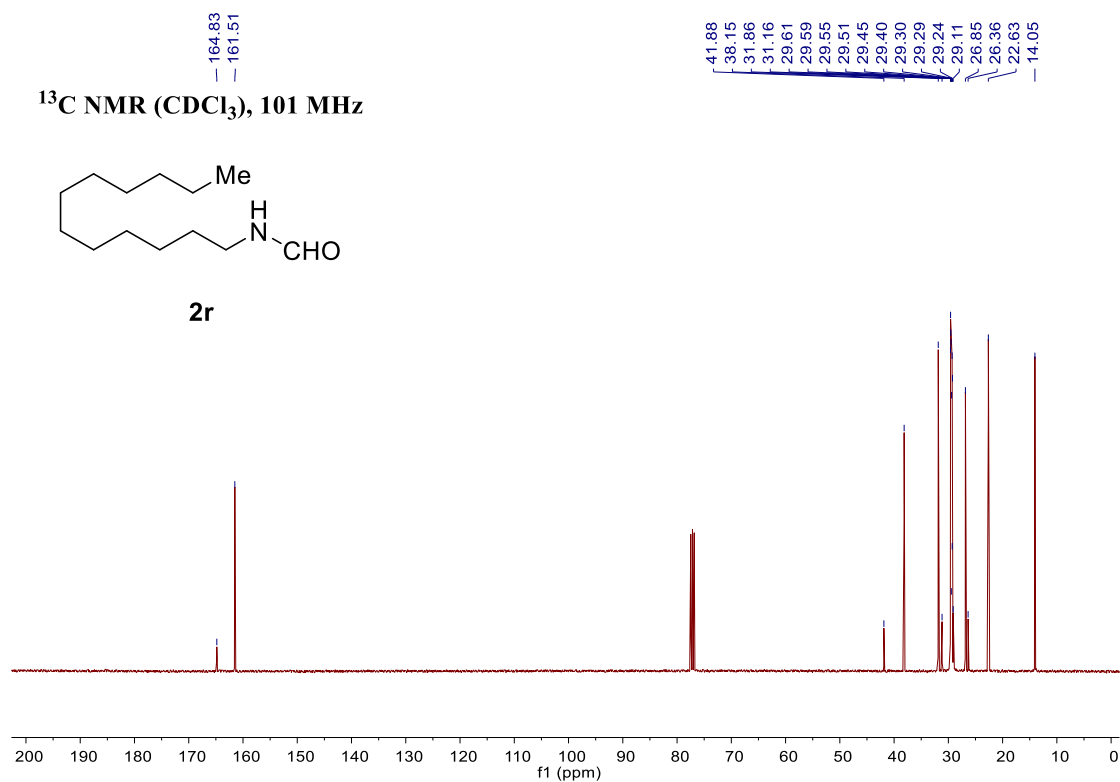

Supplement: d2ob01986h1.pdf [file d2ob01986h1.pdf]
